# Supplementary material
Source: publisher figshare collection journal article supplement (https://acs.figshare.com/ndownloader/files/26843745)
Supplement: Supplementary file 1 [file 26843745]

***Late-Stage Carbon Isotope Exchange of Aryl Nitriles through Ni-  
Catalyzed C–CN Bond Activation***

**Supporting Information**

Sean W. Reilly, Yu-hong Lam, Sumei Ren, Neil A. Strotman

## General Experimental Details

Reagents and common substrates were purchased from commercial suppliers and used as received. Non-commercially available substrates were procured from Merck's building block collection and used as received.  $\text{Zn}(^{14}\text{CN})_2$  was purchased from ViTrax. NMR chemical shifts are reported in ppm and referenced to residual solvent peaks. Coupling constants are reported in hertz (Hz).

HPLC MS analyses were performed on an Agilent 1100 HPLC-MSD instrument in API-ES positive ionization mode using an Ascentis® Express C18 column. Isotope incorporation was determined based on the mass distribution using Isopat. software.<sup>1</sup> Carbon-14 reagents and compounds were handled by experimentalist uniquely trained in working with radioactive materials and operating in specialized laboratories. C-14 radioactivity was measured in PerkinElmer Ultra Gold liquid scintillation cocktail with either a PerkinElmer 3110TR liquid scintillation analyzer. RadioHPLC and HPLC-UV comparison was conducted with an Agilent 1100 series HPLC connected in series to a PerkinElmer Radiomatic 625TR Flow Scintillation Analyzer.

**Representative Reaction Procedure:** The following setup was conducted in a glovebox under a  $\text{N}_2$  atmosphere: To an 8 mL screw-cap vial with a stir bar was added NiCOD(DQ) (0.1 mmol), 1 mL of NMP, and phosphine ligand (0.2 mmol). The solution was then allowed to stir for ~5 minutes at room temperature. Next, aryl nitrile (0.5 mmol),  $\text{BPh}_3$  (0.4 mmol), and  $\text{Zn}(^{13}\text{CN})_2$  (0.6 mmol) were added directly to the stirring solution, followed by an additional 1 mL of NMP. For  $^{14}\text{C}$  labeling reactions,  $\text{Zn}(^{13}\text{CN})_2$  was replaced with  $\text{Zn}(^{14}\text{CN})_2$ , and all other conditions were kept the same.

The reaction vial was then sealed, taken out of the glovebox, to be placed in an oil bath and heated at 80 °C for 18 hours. After which, the reaction vial was taken out of the oil bath, and then allowed to cool to room temp. Then ~5 mL of MeOH was slowly added to the crude reaction mixture, and followed by filtration of the solution on a disposable 20 mL medium frit filter funnel. The frit was washed with an additional 20 mL of MeOH, and then the solvent from the collected filtered reaction mixture was removed under reduced pressure. The crude product was then purified by silica gel chromatography.

**NOTES:** Although an air-stable Ni(COD)(DQ) complex is employed, reactions were generally set up in a glovebox due to the use of moderately air-sensitive phosphine ligand solutions and moisture-sensitive  $\text{BPh}_3$ . The use of Ni(COD)(DQ) was preferred over  $\text{Ni(COD)}_2$  due to the known thermal stability issues of  $\text{Ni(COD)}_2$ , even under an  $\text{N}_2$  atmosphere.

In several cases, mostly with method **A**, moderate yields were obtained due to methyl cross-coupling, homocoupling, protodecyanation of the ArCN substrates, and other unidentified decomposition pathways. At extended reaction times or higher temperatures, greater decomposition of the substrate was observed.

**Mass Spectral Data and IsoPat Analysis:** Percent  $^{13}\text{C}$  and  $^{14}\text{C}$  incorporation was determined by comparison of the mass spectral patterns of the labeled product versus authentic starting material using the IsoPat2 spreadsheet.<sup>1</sup> The mass spectra were tabulated for abundance vs.  $m/z$ , and these data were inputted to the IsoPat2 spreadsheet (included below), which uses its programmed algorithm to determine the relative percentage of each labeled species differentiated in the number of incorporated isotopes. Sum of these percentages give rise to the overall isotope enrichment. For the  $^{14}\text{C}$  labeled compound, specific activity (SA) is the radioactivity per quantity of a radionuclide, expressed as Ci/mmol in this work.  $^{14}\text{C}$  has a

maximum theoretical SA of 62.4 mCi per mmol, which refers to 100% of the molecules contain one  $^{14}\text{C}$  label.

### Initial Optimization Studies

**Solvent and Lewis Acid Screen:** As shown in Table S1, polar solvents were found to be most optimal, with the highest  $^{13}\text{C}$  enrichment achieved in NMP (entry 10). No CIE was observed when replacing  $\text{Zn}(^{13}\text{CN})_2$  with  $\text{Cu}^{13}\text{CN}$  or  $\text{K}^{13}\text{CN}$ .

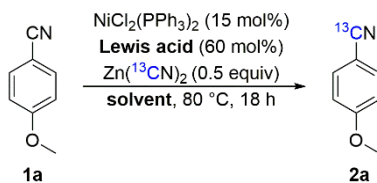

**Table S1**

| Reaction | Solvent            | Lewis acid                                           | LCMS Yield (%) | % $^{13}\text{C}$ Enrichment |
|----------|--------------------|------------------------------------------------------|----------------|------------------------------|
| 1        | toluene            | $\text{AlMe}_3$                                      | <10            | 12                           |
| 2        | trifluorotoluene   | $\text{AlMe}_3$                                      | <10            | 9                            |
| 3        | 1,2-dichloroethane | $\text{AlMe}_3$                                      | <10            | <1                           |
| 4        | MTBE               | $\text{AlMe}_3$                                      | <10            | 27                           |
| 5        | DMAC               | $\text{AlMe}_3$                                      | 85             | 45                           |
| 6        | dioxane            | $\text{AlMe}_3$                                      | 31             | 30                           |
| 7        | DME                | $\text{AlMe}_3$                                      | <10            | 28                           |
| 8        | DMAC               | $\text{AlMe}_3$                                      | 89             | 42                           |
| 9        | DMF                | $\text{AlMe}_3$                                      | 64             | 50                           |
| 11       | DMAC               | $\text{AlMe}_3$                                      | 94             | 4                            |
| 10       | NMP                | $\text{AlMe}_3$                                      | 80             | 53                           |
| 13       | NMP                | $\text{Al}(\text{CH}_3)_2\text{Cl}$                  | 42             | 37                           |
| 14       | NMP                | $\text{AlEt}_3$                                      | 9              | 45                           |
| 15       | NMP                | $\text{Al}(\text{Et}_2)\text{Cl}$                    | 56             | 34                           |
| 16       | NMP                | $\text{AlCl}_3$                                      | >95            | <3                           |
| 17       | NMP                | $\text{Al}^i\text{Bu}_3$                             | >95            | 31                           |
| 18       | NMP                | $\text{B}(\text{Ph})_3$                              | >95            | <3                           |
| 19       | NMP                | $\text{BEt}_3$                                       | 89             | <3                           |
| 20       | NMP                | $\text{BF}_3 \cdot \text{O}(\text{C}_2\text{H}_5)_2$ | 50             | <3                           |
| 21       | NMP                | $\text{Ho}(\text{OTf})_3$                            | >95            | <3                           |
| 22       | NMP                | $\text{Zn}(\text{OTf})_2$                            | 78             | <3                           |
| 23       | NMP                | TMSOTf                                               | 86             | <3                           |
| 24       | NMP                | TFAA                                                 | 62             | <3                           |

**Ni Complex Screen:** Using the optimized conditions from Table S1 (entry 10), we then examined an array of Ni complexes to determine which complex provided the highest amount of  $^{13}\text{C}$  enrichment (Table S2). Although  $\text{NiCl}_2(\text{PMe}_3)_2$  was found to be the most optimal Ni complex in this screen (entry 28), comparable  $^{13}\text{C}$  enrichment values were also observed with other alkyl phosphine (entry 29 and 31) and NNN pincer (entry 35) Ni (II) systems.

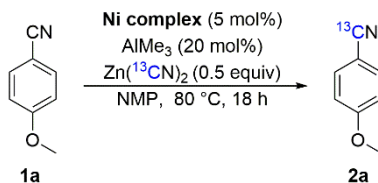

**Table S2**

| Reaction | Ni Complex                                                                                                  | LCMS Yield (%) | % $^{13}\text{C}$ Enrichment |
|----------|-------------------------------------------------------------------------------------------------------------|----------------|------------------------------|
| 25       | $\text{NiCl}_2(\text{PPh}_3)_2$                                                                             | 96             | 37                           |
| 26       | $\text{NiCl}_2$ glyme                                                                                       | >97            | 12                           |
| 27       | $\text{NiCl}_2(\text{dppp})$                                                                                | 95             | 27                           |
| 28       | $\text{NiCl}_2(\text{PMe}_3)_2$                                                                             | 82             | 50                           |
| 29       | $\text{NiCl}_2(\text{P}^i\text{Bu}_3)_2$                                                                    | 92             | 48                           |
| 30       | $\text{NiCl}_2(\text{dppe})$                                                                                | 93             | 37                           |
| 31       | <i>trans</i> -( $\text{PCy}_2\text{Ph}$ ) $_2\text{Ni(o-tolyl)Cl}$                                          | 92             | 45                           |
| 32       | $\text{NiCl}_2(\text{PCy}_3)_2$                                                                             | 91             | 36                           |
| 36       | $\text{NiCl}_2(\text{dppf})$                                                                                | 92             | 22                           |
| 33       | <i>bis</i> (methyl methacrylate)[1,3-bis(2,4,6-trimethylphenyl)imidazol-2-ylidene]nickel                    | 93             | 32                           |
| 34       | <i>Chloro</i> (4-cyanophenyl)[(R)-1-[(S)-2-(dicyclohexylphosphino)ferrocenyl]ethyl]diphenylphosphine]nickel | 95             | 25                           |
| 35       | <i>bis</i> [(2-dimethylamino)phenyl]amine nickel chloride                                                   | 92             | 45                           |

**Loading Optimization for  $\text{Zn}(^{13}\text{C})_2$ ,  $\text{NiCl}_2(\text{PMe}_3)_2$ , and Lewis Acid:** Optimal loading ratios for  $\text{Zn}(^{13}\text{C})_2$ ,  $\text{NiCl}_2(\text{PMe}_3)_2$ , and  $\text{AlMe}_3$  were identified through systematic reaction studies (Table S3). Maximum  $^{13}\text{C}$  enrichment for **2a** was obtained using the conditions shown in entry 39. It should be noted that no appreciable increase in  $^{13}\text{C}$  enrichment for **2a** was observed when running entry 39 conditions at 100 °C. Decreasing the reaction temperature to 60 °C, using the conditions from entry 39, led to a reduction in **2a** enrichment.

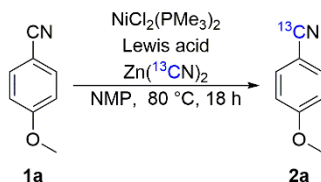

**Table S3**

| Reaction | $\text{Zn}(^{13}\text{C})_2$ (equiv) | $\text{NiCl}_2(\text{PMe}_3)_2$ (mol%) | Lewis acid (mol%)                                                                         | LCMS Yield (%) | % $^{13}\text{C}$ Enrichment |
|----------|--------------------------------------|----------------------------------------|-------------------------------------------------------------------------------------------|----------------|------------------------------|
| 37       | 2.0                                  | 20                                     | $\text{AlMe}_3$ (80 mol%)                                                                 | 66             | 77                           |
| 38       | 1.5                                  | 20                                     | $\text{AlMe}_3$ (80 mol%)                                                                 | 66             | 73                           |
| 39       | 1.2                                  | 20                                     | $\text{AlMe}_3$ (80 mol%)                                                                 | 60             | 73                           |
| 40       | 1.2                                  | 20                                     | DABAL- $\text{Me}_3$ (40 mol%)<br>[2 $\text{AlMe}_3$ molecules per DABAL- $\text{Me}_3$ ] | 77             | 54                           |
| 41       | 1.1                                  | 20                                     | $\text{AlMe}_3$ (80 mol%)                                                                 | 61             | 72                           |
| 42       | 1.1                                  | 15                                     | $\text{AlMe}_3$ (80 mol%)                                                                 | 83             | 57                           |
| 43       | 1.1                                  | 10                                     | $\text{AlMe}_3$ (80 mol%)                                                                 | 87             | 50                           |
| 44       | 0.6                                  | 20                                     | $\text{AlMe}_3$ (80 mol%)                                                                 | 63             | 52                           |
| 45       | 0.3                                  | 20                                     | $\text{AlMe}_3$ (80 mol%)                                                                 | 47             | 39                           |
| 46       | 1.1                                  | 20                                     | $\text{AlMe}_3$ (60 mol%)                                                                 | 80             | 64                           |
| 47       | 1.1                                  | 20                                     | $\text{AlMe}_3$ (40 mol%)                                                                 | 88             | 54                           |
| 48       | 1.1                                  | 20                                     | $\text{AlMe}_3$ (20 mol%)                                                                 | 91             | 11                           |

## Computational Methods, Cartesian Coordinates, and Energies

The quantum chemical calculations were performed using the Gaussian 16 electronic structure program.<sup>2</sup> Geometry optimization and frequency calculations were performed at the B3LYP-D3/basis-I level of theory,<sup>3-7</sup> where basis-I stands for the 6-31+G\* basis set for the non-metal atoms and the LANL2DZ<sup>8</sup> basis set and effective core potential for Ni. Pure d-type angular momentum functions were used for all systems. An “ultrafine” integration grid and a two-electron integral accuracy of  $10^{-14}$  (int=(Acc2E=14,ultrafine)) were used. The natures of all stationary points were verified by calculating vibrational frequencies at the same level of theory. The thermal corrections for Gibbs energies were calculated for 298.15 K and 1 atm using the quasi-harmonic approximation proposed by Cramer and Truhlar<sup>9</sup>, in which all of the real vibrational frequencies lower than  $100\text{ cm}^{-1}$  were set to  $100\text{ cm}^{-1}$  before their contributions to the vibrational entropy were computed with the usual harmonic oscillator model. For a best estimate of Gibbs energies, single-point electronic energies were computed for the B3LYP-D3/basis-I geometries using the M06<sup>10</sup> density functional and the def2-TZVPD<sup>11</sup> basis for all atoms. The def2-TZVPD basis set specifications were obtained from the EMSL Basis Set Exchange website.<sup>12</sup> Solvation corrections were computed for all optimized structures using the PCM solvation model<sup>13</sup> with the dielectric constant of NMP,  $\epsilon = 32.0$ .

### Structure: 5

```
Charge = 0, Multiplicity = 1
SCF Energy: -1416.111318 hartree
SCF Energy + ZPVE: -1415.780853 hartree
Enthalpy: -1415.756214 hartree
Free Energy: -1415.835640 hartree
Free Energy with quasiharmonic correction: -1415.829944 hartree
SCF Energy (SP): -2754.81488208 hartree
DeltaG (solv) (kcal/mol) = -7.27
Ni 0.61575 -0.19761 0.02743
P 2.66402 -1.08200 0.04492
C 4.26866 -0.15052 0.07539
H 5.13110 -0.82908 0.07845
H 4.33578 0.50301 -0.80093
H 4.31305 0.47837 0.97159
C 2.88165 -2.23444 1.47427
H 3.81251 -2.81080 1.40039
H 2.88361 -1.66570 2.41038
H 2.02384 -2.91383 1.48965
C 2.92887 -2.22384 -1.38542
H 3.85792 -2.79925 -1.28570
H 2.07415 -2.90577 -1.43260
H 2.95985 -1.64923 -2.31744
P 0.58697 1.97689 -0.08634
C 2.17354 2.84792 -0.49859
H 2.04134 3.93598 -0.55048
H 2.92719 2.61466 0.26035
H 2.54440 2.48817 -1.46438
```

|   |          |          |          |
|---|----------|----------|----------|
| C | -0.53458 | 2.72635  | -1.35823 |
| H | -0.49712 | 3.82294  | -1.33859 |
| H | -0.23109 | 2.37596  | -2.35058 |
| H | -1.56254 | 2.39344  | -1.18818 |
| C | 0.09573  | 2.90706  | 1.44216  |
| H | 0.10503  | 3.99168  | 1.27575  |
| H | -0.90523 | 2.60128  | 1.76136  |
| H | 0.79286  | 2.66331  | 2.25090  |
| C | -1.10977 | -0.97311 | 0.05410  |
| N | -0.30769 | -1.90564 | 0.04795  |
| C | -2.56052 | -0.78000 | 0.04597  |
| C | -3.12086 | 0.44911  | 0.42274  |
| C | -4.50539 | 0.63088  | 0.41909  |
| C | -5.34647 | -0.41541 | 0.02631  |
| C | -4.79553 | -1.64624 | -0.35286 |
| C | -3.41312 | -1.83184 | -0.33773 |
| H | -2.45841 | 1.25231  | 0.72822  |
| H | -4.92764 | 1.58652  | 0.72021  |
| H | -5.44653 | -2.46269 | -0.65607 |
| H | -2.97480 | -2.78342 | -0.62393 |
| H | -6.42436 | -0.27432 | 0.01591  |

**Structure: TS6**

Charge = 0, Multiplicity = 1

SCF Energy: -1416.077911 hartree

SCF Energy + ZPVE: -1415.749787 hartree

Enthalpy: -1415.725337 hartree

Free Energy: -1415.802854 hartree

Free Energy with quasiharmonic correction: -1415.798475 hartree

SCF Energy (SP): -2754.77894931 hartree

DeltaG (solv) (kcal/mol) = -9.84

|    |          |          |          |
|----|----------|----------|----------|
| C  | -4.15440 | -0.99072 | 0.34521  |
| C  | -3.28896 | -1.24256 | 1.41678  |
| C  | -1.91667 | -1.36627 | 1.19992  |
| C  | -1.37850 | -1.22300 | -0.09813 |
| C  | -2.26421 | -0.99457 | -1.17578 |
| C  | -3.63351 | -0.87305 | -0.95230 |
| Ni | 0.37094  | -0.15724 | -0.02292 |
| P  | -0.43060 | 1.94566  | -0.02690 |
| C  | -0.99536 | 2.49058  | -1.70532 |
| C  | 0.04774  | -1.96219 | -0.39986 |
| N  | 0.40364  | -3.04379 | -0.74689 |
| P  | 2.56335  | -0.37376 | 0.11806  |
| C  | 3.11126  | -1.62899 | 1.35872  |
| C  | 3.30846  | -1.04109 | -1.43428 |
| C  | 3.67996  | 1.05630  | 0.50036  |
| C  | 0.62114  | 3.38619  | 0.48018  |
| C  | -1.95983 | 2.23536  | 0.97263  |
| H  | -1.85984 | -0.92197 | -2.18131 |
| H  | -1.24577 | -1.58024 | 2.02715  |
| H  | -4.30178 | -0.68842 | -1.79051 |
| H  | -5.22429 | -0.90240 | 0.51458  |

|   |          |          |          |
|---|----------|----------|----------|
| H | -3.68668 | -1.34762 | 2.42360  |
| H | -2.72295 | 1.51175  | 0.67124  |
| H | -1.74324 | 2.07146  | 2.03348  |
| H | -2.34465 | 3.25373  | 0.83695  |
| H | -1.43559 | 3.49505  | -1.67789 |
| H | -0.14888 | 2.48815  | -2.40017 |
| H | -1.74337 | 1.78122  | -2.07340 |
| H | 0.94396  | 3.25663  | 1.51891  |
| H | 0.08131  | 4.33731  | 0.39139  |
| H | 4.73305  | 0.75048  | 0.53492  |
| H | 3.56165  | 1.82950  | -0.26648 |
| H | 2.83488  | -1.30210 | 2.36684  |
| H | 2.59013  | -2.56649 | 1.14085  |
| H | 4.19530  | -1.79222 | 1.31763  |
| H | 4.37734  | -1.25369 | -1.31022 |
| H | 3.17624  | -0.32128 | -2.24916 |
| H | 2.77557  | -1.96171 | -1.69275 |
| H | 3.40480  | 1.49224  | 1.46683  |
| H | 1.51688  | 3.42547  | -0.14860 |

#### Structure: 7

Charge = 0, Multiplicity = 1

SCF Energy: -1416.101669 hartree

SCF Energy + ZPVE: -1415.771577 hartree

Enthalpy: -1415.746791 hartree

Free Energy: -1415.825129 hartree

Free Energy with quasiharmonic correction: -1415.820468 hartree

SCF Energy (SP): -2754.80235905 hartree

DeltaG (solv) (kcal/mol) = -15.28

|    |          |          |          |
|----|----------|----------|----------|
| C  | 4.45944  | -0.96425 | -0.00082 |
| C  | 3.74091  | -1.02108 | -1.20092 |
| C  | 2.35036  | -0.86651 | -1.19777 |
| C  | 1.64927  | -0.64145 | -0.00228 |
| C  | 2.37674  | -0.62307 | 1.19735  |
| C  | 3.76991  | -0.77468 | 1.20092  |
| Ni | -0.25779 | -0.33592 | -0.02714 |
| P  | 0.24214  | 1.86698  | -0.04392 |
| C  | 0.61515  | 2.47569  | 1.65859  |
| C  | -0.37745 | -2.20463 | 0.04973  |
| N  | -0.54138 | -3.36400 | 0.09174  |
| P  | -2.56752 | -0.40871 | -0.00867 |
| C  | -3.21736 | -1.39143 | -1.42753 |
| C  | -3.20041 | -1.32540 | 1.46145  |
| C  | -3.70227 | 1.05710  | -0.02989 |
| C  | -0.98240 | 3.12862  | -0.62836 |
| C  | 1.74514  | 2.38415  | -0.97892 |
| H  | 1.85419  | -0.50269 | 2.14452  |
| H  | 1.80614  | -0.92401 | -2.13822 |
| H  | 4.31377  | -0.75450 | 2.14352  |
| H  | 5.54008  | -1.08478 | -0.00115 |
| H  | 4.26398  | -1.19232 | -2.13988 |
| H  | 2.62126  | 1.86565  | -0.58354 |

|   |          |          |          |
|---|----------|----------|----------|
| H | 1.64021  | 2.10805  | -2.03282 |
| H | 1.88474  | 3.46838  | -0.89916 |
| H | 0.87818  | 3.53978  | 1.64556  |
| H | -0.25466 | 2.32698  | 2.30677  |
| H | 1.45336  | 1.90208  | 2.06336  |
| H | -1.30771 | 2.89286  | -1.64701 |
| H | -0.53447 | 4.12906  | -0.62361 |
| H | -4.74753 | 0.72618  | -0.01361 |
| H | -3.52538 | 1.68807  | 0.84747  |
| H | -2.98924 | -0.87777 | -2.36759 |
| H | -2.71879 | -2.36420 | -1.43109 |
| H | -4.30206 | -1.52806 | -1.34571 |
| H | -4.28686 | -1.45883 | 1.40022  |
| H | -2.95723 | -0.77134 | 2.37448  |
| H | -2.70665 | -2.29948 | 1.50296  |
| H | -3.53888 | 1.65631  | -0.93046 |
| H | -1.85995 | 3.13603  | 0.02221  |

### Structure: 8

Charge = 0, Multiplicity = 1

SCF Energy: -2136.030664 hartree

SCF Energy + ZPVE: -2135.418898 hartree

Enthalpy: -2135.378838 hartree

Free Energy: -2135.491089 hartree

Free Energy with quasiharmonic correction: -2135.481998 hartree

SCF Energy (SP): -3474.35132546 hartree

DeltaG (solv) (kcal/mol) = -10.80

|    |         |          |          |
|----|---------|----------|----------|
| Ni | 1.57470 | 0.38402  | -0.15342 |
| P  | 2.59536 | -1.63590 | 0.06550  |
| C  | 3.48752 | -2.20744 | -1.45294 |
| H  | 4.04415 | -3.13234 | -1.26001 |
| H  | 2.74793 | -2.39902 | -2.23725 |
| H  | 4.18002 | -1.43954 | -1.80857 |
| C  | 3.92900 | -1.64937 | 1.35196  |
| H  | 4.44076 | -2.61864 | 1.38511  |
| H  | 4.66703 | -0.86444 | 1.16005  |
| H  | 3.47085 | -1.45952 | 2.32858  |
| C  | 1.67543 | -3.16317 | 0.52465  |
| H  | 2.34973 | -4.02746 | 0.48129  |
| H  | 1.27150 | -3.06547 | 1.53455  |
| H  | 0.83921 | -3.31437 | -0.16106 |
| P  | 3.21706 | 1.83631  | -0.35278 |
| C  | 4.80387 | 1.30936  | -1.15145 |
| H  | 5.51628 | 2.14197  | -1.19117 |
| H  | 5.25939 | 0.48251  | -0.59904 |
| H  | 4.60178 | 0.97028  | -2.17275 |
| C  | 2.83164 | 3.33706  | -1.35833 |
| H  | 3.68376 | 4.02678  | -1.38771 |
| H  | 2.58608 | 3.02621  | -2.37931 |
| H  | 1.95934 | 3.85033  | -0.94629 |
| C  | 3.83696 | 2.55875  | 1.23400  |
| H  | 4.63072 | 3.29412  | 1.05594  |



|   |          |          |          |
|---|----------|----------|----------|
| H | 3.01263  | 3.04324  | 1.76583  |
| H | 4.22513  | 1.75780  | 1.87169  |
| C | -0.01726 | 1.37063  | -0.17397 |
| N | -0.32463 | 0.17407  | -0.16630 |
| C | -0.67610 | 2.67262  | -0.15886 |
| C | -0.16129 | 3.69227  | 0.65797  |
| C | -0.79443 | 4.93383  | 0.71903  |
| C | -1.93216 | 5.17502  | -0.05949 |
| C | -2.43966 | 4.16601  | -0.88541 |
| C | -1.82190 | 2.91666  | -0.93373 |
| H | 0.71961  | 3.49116  | 1.26135  |
| H | -0.40230 | 5.71106  | 1.37002  |
| H | -3.33290 | 4.34214  | -1.47828 |
| H | -2.23506 | 2.12187  | -1.54365 |
| B | -1.45330 | -0.92368 | 0.03276  |
| C | -0.47754 | -2.86329 | 3.98017  |
| C | -1.25881 | -3.52992 | 3.03038  |
| C | -1.55896 | -2.91989 | 1.80840  |
| C | -1.09786 | -1.63236 | 1.47470  |
| C | -0.33022 | -0.98048 | 2.46083  |
| C | -0.01851 | -1.57571 | 3.68870  |
| H | -0.23684 | -3.33609 | 4.92966  |
| H | -1.62946 | -4.53195 | 3.23777  |
| H | -2.14828 | -3.48036 | 1.08984  |
| H | 0.05506  | 0.01759  | 2.26532  |
| H | 0.58180  | -1.03207 | 4.41668  |
| C | -1.23320 | -3.80400 | -3.40695 |
| C | -0.26641 | -2.80497 | -3.26794 |
| C | -0.33839 | -1.89904 | -2.20311 |
| C | -1.35999 | -1.94865 | -1.23545 |
| C | -2.33872 | -2.94669 | -1.42655 |
| C | -2.27956 | -3.86358 | -2.48008 |
| H | -1.18325 | -4.51257 | -4.23059 |
| H | 0.54154  | -2.72472 | -3.99399 |
| H | 0.42154  | -1.12437 | -2.13054 |
| H | -3.18704 | -2.99148 | -0.74704 |
| H | -3.05655 | -4.61849 | -2.58384 |
| C | -5.22985 | 1.48991  | 0.18512  |
| C | -4.90253 | 0.77543  | -0.97105 |
| C | -3.74231 | -0.00764 | -1.00843 |
| C | -2.87520 | -0.11168 | 0.09611  |
| C | -3.23895 | 0.61002  | 1.24960  |
| C | -4.38982 | 1.40131  | 1.30035  |
| H | -6.12897 | 2.10146  | 0.21968  |
| H | -5.54878 | 0.82771  | -1.84563 |
| H | -3.50458 | -0.54497 | -1.92342 |
| H | -2.60359 | 0.55394  | 2.13098  |
| H | -4.63155 | 1.94953  | 2.20900  |
| H | -2.42443 | 6.14323  | -0.01728 |

**Structure: TS9**

Charge = 0, Multiplicity = 1

SCF Energy: -2135.988802 hartree  
 SCF Energy + ZPVE: -2135.380954 hartree  
 Enthalpy: -2135.340221 hartree  
 Free Energy: -2135.457086 hartree  
 Free Energy with quasiharmonic correction: -2135.444347 hartree  
 SCF Energy (SP): -3474.31241521 hartree

| DeltaG (solv) |          | (kcal/mol) = | -12.67   |
|---------------|----------|--------------|----------|
| C             | 1.72027  | -4.16422     | -0.79773 |
| C             | 1.79063  | -3.37962     | -1.95510 |
| C             | 1.53766  | -2.00893     | -1.88583 |
| C             | 1.23368  | -1.40579     | -0.65003 |
| C             | 1.14603  | -2.20408     | 0.50948  |
| C             | 1.38996  | -3.57366     | 0.42994  |
| Ni            | 2.06203  | 0.48764      | -0.56053 |
| P             | 4.11972  | -0.04566     | 0.22363  |
| C             | 4.03965  | -0.36551     | 2.04318  |
| C             | 0.32793  | -0.01332     | -0.67044 |
| N             | -0.83151 | 0.17514      | -0.48133 |
| P             | 1.65740  | 2.65228      | -0.75562 |
| C             | 0.73650  | 3.11750      | -2.28386 |
| C             | 0.53890  | 3.26077      | 0.57624  |
| C             | 3.04074  | 3.88058      | -0.72500 |
| C             | 5.56793  | 1.09994      | 0.09995  |
| C             | 4.82179  | -1.63091     | -0.41233 |
| H             | 0.85128  | -1.75211     | 1.45123  |
| H             | 1.56029  | -1.39831     | -2.78454 |
| H             | 1.30659  | -4.18353     | 1.32568  |
| H             | 1.90112  | -5.23441     | -0.85516 |
| H             | 2.02804  | -3.83834     | -2.91176 |
| H             | 4.07993  | -2.42503     | -0.28608 |
| H             | 5.03643  | -1.53715     | -1.48192 |
| H             | 5.74294  | -1.90214     | 0.11722  |
| H             | 5.00374  | -0.71381     | 2.43268  |
| H             | 3.74939  | 0.55084      | 2.56754  |
| H             | 3.27578  | -1.12444     | 2.23845  |
| H             | 5.78821  | 1.30431      | -0.95328 |
| H             | 6.46033  | 0.67313      | 0.57344  |
| H             | 2.66682  | 4.90393      | -0.84913 |
| H             | 3.56989  | 3.81294      | 0.23138  |
| H             | 1.34537  | 2.90591      | -3.16892 |
| H             | -0.17416 | 2.51375      | -2.33072 |
| H             | 0.46325  | 4.17910      | -2.27583 |
| H             | 0.31906  | 4.32697      | 0.44901  |
| H             | 1.00278  | 3.09960      | 1.55479  |
| H             | -0.39964 | 2.70024      | 0.53504  |
| H             | 3.75312  | 3.66107      | -1.52718 |
| H             | 5.32881  | 2.05077      | 0.58703  |
| B             | -2.24926 | -0.03468     | 0.16935  |
| C             | -0.84887 | -1.98604     | 3.95876  |
| C             | -1.65667 | -2.69603     | 3.06676  |
| C             | -2.13876 | -2.07863     | 1.90419  |
| C             | -1.83754 | -0.74194     | 1.59458  |

|   |          |          |          |
|---|----------|----------|----------|
| C | -1.03571 | -0.04445 | 2.52264  |
| C | -0.54332 | -0.64608 | 3.68309  |
| H | -0.47020 | -2.46278 | 4.86043  |
| H | -1.90878 | -3.73511 | 3.27063  |
| H | -2.74957 | -2.65610 | 1.21523  |
| H | -0.78215 | 0.99476  | 2.32084  |
| H | 0.07386  | -0.07446 | 4.37454  |
| C | -4.07371 | 4.04054  | 0.49465  |
| C | -3.48292 | 3.60614  | -0.69885 |
| C | -2.92128 | 2.32930  | -0.77264 |
| C | -2.91670 | 1.44504  | 0.32445  |
| C | -3.52651 | 1.90302  | 1.50438  |
| C | -4.09835 | 3.17956  | 1.59509  |
| H | -4.51467 | 5.03285  | 0.56127  |
| H | -3.46869 | 4.26010  | -1.56930 |
| H | -2.47878 | 1.99872  | -1.71168 |
| H | -3.55144 | 1.25092  | 2.37477  |
| H | -4.56177 | 3.50042  | 2.52626  |
| C | -4.63909 | -2.80264 | -2.40144 |
| C | -5.26684 | -1.77348 | -1.69250 |
| C | -4.50869 | -0.89307 | -0.91197 |
| C | -3.11138 | -1.01064 | -0.80515 |
| C | -2.50529 | -2.05701 | -1.52791 |
| C | -3.24935 | -2.94073 | -2.31623 |
| H | -5.22394 | -3.48694 | -3.01242 |
| H | -6.34701 | -1.65287 | -1.75080 |
| H | -5.01408 | -0.09255 | -0.37572 |
| H | -1.42705 | -2.19186 | -1.46722 |
| H | -2.74604 | -3.73780 | -2.86101 |

### Structure: 10

Charge = 0, Multiplicity = 1

SCF Energy: -2136.010106 hartree

SCF Energy + ZPVE: -2135.400471 hartree

Enthalpy: -2135.359406 hartree

Free Energy: -2135.477745 hartree

Free Energy with quasiharmonic correction: -2135.463743 hartree

SCF Energy (SP): -3474.33353103 hartree

DeltaG (solv) (kcal/mol) = -16.05

|    |          |          |          |
|----|----------|----------|----------|
| Ni | 2.15659  | -0.23154 | 0.03364  |
| P  | 4.40008  | -0.10678 | 0.01673  |
| C  | 5.43502  | -1.62869 | -0.16764 |
| H  | 5.20336  | -2.12801 | -1.11349 |
| H  | 6.49926  | -1.36681 | -0.16010 |
| H  | 5.23793  | -2.32592 | 0.65070  |
| P  | 1.62621  | -2.49683 | 0.03504  |
| C  | 0.46010  | -2.92788 | 1.39672  |
| C  | 0.68944  | -2.94643 | -1.48429 |
| C  | 2.85734  | -3.87262 | 0.15906  |
| H  | 0.93674  | -2.75230 | 2.36685  |
| H  | -0.43419 | -2.30402 | 1.33129  |
| H  | 0.16391  | -3.98031 | 1.32418  |

|   |          |          |          |
|---|----------|----------|----------|
| H | -0.19678 | -2.31284 | -1.57367 |
| H | 1.31901  | -2.79599 | -2.36763 |
| H | 0.36458  | -3.99164 | -1.44442 |
| H | 3.41642  | -3.80217 | 1.09749  |
| H | 2.33705  | -4.83716 | 0.13477  |
| H | 3.56457  | -3.83576 | -0.67397 |
| C | 2.00110  | 3.83636  | -1.15438 |
| C | 2.01627  | 4.53573  | 0.05708  |
| C | 2.08608  | 3.82582  | 1.25987  |
| C | 2.14906  | 2.42653  | 1.24812  |
| C | 2.15873  | 1.71583  | 0.03879  |
| C | 2.06436  | 2.43811  | -1.16041 |
| H | 1.92097  | 4.37693  | -2.09498 |
| H | 2.07419  | 4.35798  | 2.20867  |
| H | 2.17284  | 1.88790  | 2.19355  |
| H | 2.02436  | 1.90806  | -2.10973 |
| C | 0.32509  | 0.02253  | 0.02953  |
| N | -0.83242 | 0.11464  | 0.01803  |
| C | 5.09544  | 0.62836  | 1.55686  |
| C | 5.10714  | 0.96122  | -1.30793 |
| H | 6.18748  | 0.69290  | 1.49192  |
| H | 4.67728  | 1.62794  | 1.69785  |
| H | 4.82271  | 0.01161  | 2.41955  |
| H | 6.20085  | 0.97445  | -1.24080 |
| H | 4.81214  | 0.57719  | -2.29005 |
| H | 4.71703  | 1.97615  | -1.20650 |
| C | -2.89529 | 1.47271  | -0.69764 |
| C | -4.14841 | 1.56220  | -1.33169 |
| C | -2.13356 | 2.65442  | -0.62821 |
| C | -4.62558 | 2.76562  | -1.86142 |
| H | -4.76050 | 0.66700  | -1.42648 |
| C | -2.59587 | 3.86340  | -1.15860 |
| H | -1.15436 | 2.63498  | -0.15341 |
| C | -3.84882 | 3.92597  | -1.77693 |
| H | -5.60034 | 2.79638  | -2.34486 |
| H | -1.97628 | 4.75569  | -1.08791 |
| H | -4.21356 | 4.86384  | -2.19041 |
| C | -2.69714 | -1.25649 | -0.92687 |
| C | -2.93935 | -2.51520 | -0.34657 |
| C | -2.59371 | -1.21666 | -2.33139 |
| C | -3.06799 | -3.67574 | -1.11972 |
| H | -3.03701 | -2.58789 | 0.73447  |
| C | -2.71999 | -2.36720 | -3.11704 |
| H | -2.41205 | -0.26021 | -2.81756 |
| C | -2.95579 | -3.60722 | -2.51186 |
| H | -3.26227 | -4.63131 | -0.63536 |
| H | -2.63875 | -2.29702 | -4.20026 |
| H | -3.06023 | -4.50459 | -3.11809 |
| C | -2.91967 | -0.06188 | 1.51360  |
| C | -4.30238 | -0.18438 | 1.75494  |
| C | -2.08099 | -0.07838 | 2.64117  |
| C | -4.82098 | -0.32187 | 3.04417  |

|   |          |          |          |
|---|----------|----------|----------|
| H | -4.98857 | -0.17184 | 0.91060  |
| C | -2.58631 | -0.21310 | 3.94139  |
| H | -1.00534 | 0.02549  | 2.51144  |
| C | -3.96155 | -0.33815 | 4.14981  |
| H | -5.89572 | -0.41379 | 3.18897  |
| H | -1.90414 | -0.21657 | 4.79011  |
| H | -4.36051 | -0.44263 | 5.15636  |
| B | -2.39404 | 0.08013  | -0.02384 |
| H | 1.95557  | 5.62105  | 0.06411  |

**Structure: BPh<sub>3</sub>**

Charge = 0, Multiplicity = 1

SCF Energy: -719.870417 hartree

SCF Energy + ZPVE: -719.592462 hartree

Enthalpy: -719.576534 hartree

Free Energy: -719.635932 hartree

Free Energy with quasiharmonic correction: -719.633492 hartree

SCF Energy (SP): -719.497004600 hartree

DeltaG (solv) (kcal/mol) = -3.30

|   |          |          |          |
|---|----------|----------|----------|
| B | -0.10300 | 1.16614  | 5.90134  |
| C | 2.52529  | 2.60731  | 2.67584  |
| C | 1.17454  | 2.34906  | 2.41820  |
| C | 0.34811  | 1.87786  | 3.44043  |
| C | 0.83257  | 1.67930  | 4.75298  |
| C | 2.19720  | 1.96333  | 4.98547  |
| C | 3.03780  | 2.40606  | 3.96207  |
| H | 3.17446  | 2.96317  | 1.87923  |
| H | 0.76997  | 2.50806  | 1.42139  |
| H | -0.69711 | 1.67074  | 3.22480  |
| H | 2.60517  | 1.82115  | 5.98308  |
| H | 4.08790  | 2.60097  | 4.16676  |
| C | 0.54511  | 2.52411  | 10.03949 |
| C | 0.07674  | 1.22937  | 9.79073  |
| C | -0.14168 | 0.80795  | 8.47747  |
| C | 0.12759  | 1.64945  | 7.37460  |
| C | 0.61398  | 2.94574  | 7.65744  |
| C | 0.80671  | 3.38572  | 8.96863  |
| H | 0.70524  | 2.85953  | 11.06150 |
| H | -0.12394 | 0.55408  | 10.61915 |
| H | -0.51590 | -0.19683 | 8.29794  |
| H | 0.83116  | 3.62120  | 6.83376  |
| H | 1.16664  | 4.39455  | 9.15648  |
| C | -3.37721 | -1.63277 | 4.98782  |
| C | -3.53009 | -0.68020 | 6.00115  |
| C | -2.48362 | 0.19556  | 6.29759  |
| C | -1.26868 | 0.16975  | 5.57630  |
| C | -1.15019 | -0.79340 | 4.54903  |
| C | -2.18018 | -1.69280 | 4.26595  |
| H | -4.18585 | -2.32401 | 4.76213  |
| H | -4.46001 | -0.62623 | 6.56232  |
| H | -2.61106 | 0.92410  | 7.09437  |
| H | -0.22911 | -0.84340 | 3.97374  |

SCF Energy + ZPVE: -812.519018 hartree

Enthalpy: -812.500493 hartree  
 Free Energy: -812.567093 hartree  
 Free Energy with quasiharmonic correction: -812.561982 hartree  
 SCF Energy (SP): -812.399945622 hartree  
 DeltaG (solv) (kcal/mol) = -42.70

|   |          |          |          |
|---|----------|----------|----------|
| C | 0.00069  | -0.00115 | 3.41139  |
| N | 0.00066  | -0.00016 | 2.23792  |
| B | 0.00082  | 0.00072  | 0.68752  |
| C | 4.07852  | 1.19742  | -0.77445 |
| C | 3.29440  | 0.30816  | -1.51606 |
| C | 2.03662  | -0.08537 | -1.04165 |
| C | 1.51103  | 0.39106  | 0.17445  |
| C | 2.32529  | 1.28176  | 0.90103  |
| C | 3.58505  | 1.68143  | 0.44319  |
| H | 5.05919  | 1.50408  | -1.13525 |
| H | 3.66420  | -0.08610 | -2.46223 |
| H | 1.45111  | -0.78908 | -1.63009 |
| H | 1.96161  | 1.66464  | 1.85241  |
| H | 4.18426  | 2.37060  | 1.03759  |
| C | -1.00033 | -4.12890 | -0.77556 |
| C | -0.32411 | -3.94376 | 0.43649  |
| C | -0.04097 | -2.65294 | 0.89449  |
| C | -0.41604 | -1.50222 | 0.17368  |
| C | -1.10132 | -1.71893 | -1.03683 |
| C | -1.38905 | -3.00508 | -1.51135 |
| H | -1.22470 | -5.13157 | -1.13645 |
| H | -0.01842 | -4.80749 | 1.02627  |
| H | 0.48061  | -2.52940 | 1.84143  |
| H | -1.42624 | -0.85993 | -1.62068 |
| H | -1.92333 | -3.12814 | -2.45307 |
| C | -3.08013 | 2.93019  | -0.76985 |
| C | -1.91005 | 2.71228  | -1.50385 |
| C | -0.93815 | 1.82102  | -1.03123 |
| C | -1.09355 | 1.11298  | 0.17553  |
| C | -2.28020 | 1.35631  | 0.89474  |
| C | -3.25843 | 2.24573  | 0.43863  |
| H | -3.83783 | 3.62489  | -1.12931 |
| H | -1.74897 | 3.24143  | -2.44273 |
| H | -0.03005 | 1.67878  | -1.61379 |
| H | -2.43455 | 0.83786  | 1.83888  |
| H | -4.16124 | 2.40702  | 1.02704  |

**Structure: CN<sup>-</sup>**

Charge = -1, Multiplicity = 1  
 SCF Energy: -92.862909 hartree  
 SCF Energy + ZPVE: -92.858072 hartree  
 Enthalpy: -92.854767 hartree  
 Free Energy: -92.877124 hartree  
 Free Energy with quasiharmonic correction: -92.877124 hartree  
 SCF Energy (SP): -92.8259120404 hartree  
 DeltaG (solv) (kcal/mol) = -64.42  
 N 1.43942 -1.06383 0.00000

C            0.25593            -1.06383            0.00000

**Structure: 11**

Charge = 1, Multiplicity = 1

SCF Energy:            -1649.062553 hartree

SCF Energy + ZPVE:    -1648.598782 hartree

Enthalpy:            -1648.567886 hartree

Free Energy:           -1648.661959 hartree

Free Energy with quasiharmonic correction: -1648.653561 hartree

SCF Energy (SP): -2987.66464099 hartree

DeltaG (solv)                            (kcal/mol) =            -36.92

|    |          |          |          |
|----|----------|----------|----------|
| Ni | 0.26004  | -0.02520 | -0.27353 |
| P  | 0.41805  | -2.27384 | -0.29150 |
| C  | 1.58489  | -2.96183 | -1.53404 |
| C  | 0.95335  | -3.05538 | 1.28519  |
| C  | -1.16530 | -3.13802 | -0.68006 |
| H  | 2.59303  | -2.59469 | -1.32609 |
| H  | 1.29454  | -2.63303 | -2.53705 |
| H  | 1.57934  | -4.05678 | -1.50018 |
| H  | 0.26478  | -2.78098 | 2.09129  |
| H  | 0.97292  | -4.14636 | 1.18795  |
| H  | 1.95129  | -2.69439 | 1.54699  |
| H  | -1.90874 | -2.92593 | 0.09496  |
| H  | -1.01500 | -4.22170 | -0.73584 |
| H  | -1.55459 | -2.77537 | -1.63570 |
| P  | 0.34014  | 2.23057  | -0.33326 |
| C  | -1.31208 | 3.05303  | -0.34980 |
| C  | 1.23731  | 3.10318  | 1.01239  |
| C  | 1.13752  | 2.86426  | -1.86516 |
| H  | -1.84749 | 2.83797  | 0.58109  |
| H  | -1.90335 | 2.66795  | -1.18531 |
| H  | -1.20724 | 4.13880  | -0.45028 |
| H  | 2.28293  | 2.78559  | 1.01818  |
| H  | 1.18234  | 4.18766  | 0.86775  |
| H  | 0.79889  | 2.84794  | 1.98255  |
| H  | 2.17653  | 2.52556  | -1.89602 |
| H  | 1.11387  | 3.95935  | -1.88829 |
| H  | 0.61437  | 2.47483  | -2.74425 |
| C  | -3.86436 | 0.30988  | 2.11428  |
| C  | -2.46397 | -0.07382 | 1.60081  |
| C  | -2.61072 | -0.03646 | 0.09306  |
| N  | -3.91014 | -0.00377 | -0.22887 |
| C  | -4.79743 | -0.06145 | 0.94171  |
| O  | -1.67844 | -0.05668 | -0.74485 |
| H  | -3.91294 | 1.38821  | 2.29787  |
| H  | -4.14032 | -0.20053 | 3.03946  |
| H  | -5.21339 | -1.07371 | 1.03749  |
| H  | -5.62983 | 0.63736  | 0.81468  |
| C  | 4.45231  | 0.12320  | -0.54398 |
| C  | 3.08977  | 0.07064  | -0.86789 |
| C  | 2.11089  | 0.01291  | 0.13665  |
| C  | 2.53155  | 0.00497  | 1.47667  |



|   |          |          |          |
|---|----------|----------|----------|
| C | 3.89167  | 0.05591  | 1.80556  |
| C | 4.85707  | 0.11690  | 0.79452  |
| H | 5.19465  | 0.16763  | -1.33751 |
| H | 2.79312  | 0.06844  | -1.91506 |
| H | 1.79453  | -0.03710 | 2.27705  |
| H | 4.19625  | 0.04964  | 2.84959  |
| H | 5.91289  | 0.15784  | 1.04749  |
| H | -1.65589 | 0.58806  | 1.92596  |
| H | -2.17506 | -1.09441 | 1.88669  |
| C | -4.42385 | -0.07616 | -1.58807 |
| H | -4.96060 | -1.02009 | -1.73950 |
| H | -5.11243 | 0.75532  | -1.77052 |
| H | -3.58658 | -0.01924 | -2.28540 |

**Structure: NMP**

Charge = 0, Multiplicity = 1

SCF Energy: -325.963318 hartree

SCF Energy + ZPVE: -325.823943 hartree

Enthalpy: -325.816072 hartree

Free Energy: -325.854864 hartree

Free Energy with quasiharmonic correction: -325.854864 hartree

SCF Energy (SP): -325.845611481 hartree

DeltaG (solv) (kcal/mol) = -6.21

|   |          |          |          |
|---|----------|----------|----------|
| C | 0.53917  | -1.38114 | 0.13227  |
| N | -0.56078 | -0.44541 | -0.06332 |
| C | -0.17918 | 0.87154  | -0.00666 |
| C | 1.34284  | 0.90421  | 0.13482  |
| C | 1.78807  | -0.53198 | -0.19023 |
| O | -0.93357 | 1.83713  | -0.04067 |
| C | -1.94332 | -0.86913 | -0.01161 |
| H | 0.54954  | -1.75239 | 1.17057  |
| H | 0.43008  | -2.24841 | -0.53018 |
| H | 1.77130  | 1.67091  | -0.51593 |
| H | 1.57415  | 1.18553  | 1.17089  |
| H | 2.66567  | -0.85780 | 0.37553  |
| H | 2.02337  | -0.61943 | -1.25694 |
| H | -2.57622 | 0.00725  | -0.16864 |
| H | -2.14592 | -1.61159 | -0.79328 |
| H | -2.18341 | -1.31430 | 0.96507  |

## Compound Characterization

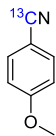

**2a** was purified on silica gel with a gradient of 0-60% EtOAc in hexanes, and obtained as a white solid in 60% yield. **<sup>1</sup>H NMR (500 MHz, DMSO-*d*<sub>6</sub>)** δ 7.75 (m, 2H), 7.09 (d, *J* = 8.8 Hz, 2H), 3.83 (s, 3H). **<sup>13</sup>C NMR (126 MHz, DMSO-*d*<sub>6</sub>)** δ 162.68, 134.13, 119.10, 115.09, 102.80, 55.63. Mass spectral data was obtained under ESI positive ionization mode and the <sup>13</sup>C isotope incorporation was determined to be 72.9%.

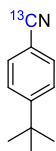

**2b** was purified on silica gel with a gradient of 0-60% EtOAc in hexanes, and obtained as a clear liquid in 42% yield. **<sup>1</sup>H NMR (500 MHz, DMSO-*d*<sub>6</sub>)** δ 7.76 – 7.71 (m, 2H), 7.58 (d, *J* = 8.3 Hz, 2H), 1.28 (s, 9H). **<sup>13</sup>C NMR (126 MHz, DMSO-*d*<sub>6</sub>)** δ 156.36, 131.96, 126.33, 118.91, 108.40, 34.96, 30.53. Mass spectral data was obtained under ESI positive ionization mode and the <sup>13</sup>C isotope incorporation was determined to be 72.1%.

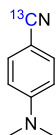

**2c** was purified on silica gel with a gradient of 0-60% EtOAc in hexanes, and obtained as a light white solid in 78% yield. **<sup>1</sup>H NMR (500 MHz, DMSO-*d*<sub>6</sub>)** δ 7.53 – 7.50 (m, 2H), 6.73 (d, *J* = 8.9 Hz, 2H), 2.98 (s, 6H). **<sup>13</sup>C NMR (126 MHz, DMSO-*d*<sub>6</sub>)** δ 152.44, 133.08, 120.47, 111.59, 95.75, 39.41. Mass spectral data was obtained under ESI positive ionization mode and the <sup>13</sup>C isotope incorporation was determined to be 65.5%.

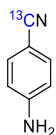

**2d** was purified on silica gel with a gradient of 0-100% EtOAc in hexanes, and obtained as an off-white solid in 90% yield. **<sup>1</sup>H NMR (500 MHz, DMSO-*d*<sub>6</sub>)** δ 7.38 (dq, *J* = 6.7, 2.2 Hz, 2H), 6.61 (d, *J* = 8.6 Hz, 2H), 6.11 (s, 2H). **<sup>13</sup>C NMR (126 MHz, DMSO-*d*<sub>6</sub>)** δ 152.99, 133.42, 120.66, 113.45, 95.56. Mass spectral data was obtained under ESI positive ionization mode and the <sup>13</sup>C isotope incorporation was determined to be 58.2%.

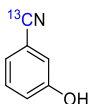

**2e** was purified on silica gel with a gradient of 0-100% EtOAc in hexanes, and obtained as an off-white solid in 77% yield. **<sup>1</sup>H NMR (500 MHz, DMSO-*d*<sub>6</sub>)** δ 10.18 (s, 1H), 7.40 – 7.34 (m, 1H), 7.22 (m, 1H), 7.10 (m, 2H). **<sup>13</sup>C NMR (126 MHz, DMSO)** δ 157.79, 130.86, 122.77, 120.74, 118.80, 118.20, 112.02. Mass spectral data was obtained under ESI positive ionization mode and the <sup>13</sup>C isotope incorporation was determined to be 73.6%.

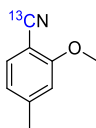

**2f** was purified on silica gel with a gradient of 0-60% EtOAc in hexanes, and obtained as a light-white solid in 81% yield. **<sup>1</sup>H NMR (500 MHz, DMSO-*d*<sub>6</sub>)** δ 7.60 – 7.53 (m, 1H), 7.07 (s, 1H), 6.90 (d, *J* = 7.8 Hz, 1H), 3.89 (s, 3H), 2.37 (s, 3H). **<sup>13</sup>C NMR (126 MHz, DMSO)** δ 160.76, 146.09, 133.22, 121.75, 116.65, 112.72, 97.35, 56.05, 21.68. Mass spectral data was obtained under ESI positive ionization mode and the <sup>13</sup>C isotope incorporation was determined to be 62.7%.

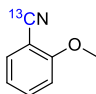

**2g** was purified on silica gel with a gradient of 0-60% EtOAc in hexanes, and obtained as a clear oil in 52% yield. **<sup>1</sup>H NMR (500 MHz, DMSO-*d*<sub>6</sub>)** δ 7.75 – 7.69 (m, 1H), 7.69 – 7.63 (m, 1H), 7.23 (d, *J* = 8.6 Hz, 1H), 7.09 (t, *J* = 7.6 Hz, 1H), 3.91 (s, 3H). **<sup>13</sup>C NMR (126 MHz, DMSO)** δ 160.80, 135.09, 133.60, 120.98, 116.40, 112.17, 100.27, 56.17. Mass spectral data was obtained under ESI positive ionization mode and the <sup>13</sup>C isotope incorporation was determined to be 67.0%.

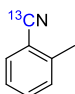

**2h** was purified on silica gel with a gradient of 0-60% EtOAc in hexanes, and obtained as a clear oil in 67% yield. **<sup>1</sup>H NMR (500 MHz, DMSO-*d*<sub>6</sub>)** δ 7.77 – 7.72 (m, 1H), 7.59 (t, *J* = 7.6 Hz, 1H), 7.45 (d, *J* = 7.8 Hz, 1H), 7.36 (t, *J* = 7.6 Hz, 1H), 2.47 (s, 3H). **<sup>13</sup>C NMR (126 MHz, DMSO)** δ 134.32, 134.27, 131.88, 129.34, 129.27, 128.47, 127.99, 127.74, 126.27, 119.14, 108.39. Mass spectral data was obtained under ESI positive ionization mode and the <sup>13</sup>C isotope incorporation was determined to be 83.7%.

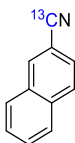

**2i** was purified on silica gel with a gradient of 0-60% EtOAc in hexanes, and obtained as a white solid in 40% yield. **<sup>1</sup>H NMR (500 MHz, DMSO-*d*<sub>6</sub>)** δ 8.60 – 8.56 (m, 1H), 8.11 (d, *J* = 8.5 Hz, 1H), 8.06 (t, *J* = 8.0 Hz, 2H), 7.81 – 7.76 (m, 1H), 7.76 – 7.70 (m, 1H), 7.68 (t, *J* = 7.5 Hz, 1H). **<sup>13</sup>C NMR (126 MHz, DMSO)** δ 141.43, 133.08, 132.43, 130.30, 126.56, 117.90, 111.71, 19.85. Mass spectral data was obtained under ESI positive ionization mode and the <sup>13</sup>C isotope incorporation was determined to be 71.2%.

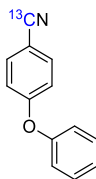

**2j** was purified on silica gel with a gradient of 0-60% EtOAc in hexanes, and obtained as a crystalline semi-solid in 50% yield. **<sup>1</sup>H NMR (500 MHz, DMSO-*d*<sub>6</sub>)** δ 7.83 (dq, *J* = 6.7, 2.2 Hz, 4H), 7.47 (t, *J* = 7.9 Hz, 4H), 7.27 (t, *J* = 7.4 Hz, 2H), 7.14 (d, *J* = 7.8 Hz, 4H), 7.08 (d, *J* = 8.7 Hz, 4H). **<sup>13</sup>C NMR (126 MHz, DMSO)** δ 161.09, 154.40, 134.60, 130.41, 125.14, 120.22, 118.67, 117.98, 105.04. Mass spectral data was obtained under ESI positive ionization mode and the <sup>13</sup>C isotope incorporation was determined to be 68.7%.

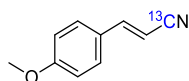

**2k** (isolated as mixture of *cis* and *trans*) was purified on silica gel with a gradient of 0-60% EtOAc in hexanes, and obtained as a clear viscous oil in 54% yield. **<sup>1</sup>H NMR (500 MHz, DMSO-*d*<sub>6</sub>)** δ 7.81 (d, *J* = 8.7 Hz, 1H), 7.60 (d, *J* = 8.7 Hz, 2H), 7.56 (dt, *J* = 16.7, 4.4 Hz, 1H), 7.30 (dt, *J* = 11.9, 8.0 Hz, 1H), 7.06 (d, *J* = 8.8 Hz, 1H), 6.99 (d, *J* = 8.7 Hz, 2H), 6.26 (d, *J* = 16.7 Hz, 1H), 5.67 (d, *J* = 12.1 Hz, 1H), 3.81 (s, 2H), 3.80 (s, 3H). **<sup>13</sup>C NMR (126 MHz, DMSO)** δ 161.54, 161.18, 150.10, 148.21, 130.58, 129.52, 126.49, 120.23, 119.21, 118.30, 114.39, 93.62, 92.15, 55.36. Mass spectral data was obtained under ESI positive ionization mode and the <sup>13</sup>C isotope incorporation was determined to be 45.6%.

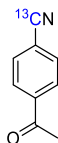

**2l** was purified on silica gel with a gradient of 0-40% EtOAc in hexanes, and obtained as a light white solid in 60% yield. **<sup>1</sup>H NMR (500 MHz, DMSO-*d*<sub>6</sub>)** δ 8.09 (d, *J* = 8.2 Hz, 2H), 8.00 (dq, *J* = 6.2, 2.3 Hz, 2H), 2.63 (s, 3H). **<sup>13</sup>C NMR (126 MHz, DMSO)** δ 197.32, 139.84, 132.74, 128.74, 118.14, 115.13, 26.96. Mass spectral data was obtained under ESI positive ionization mode and the <sup>13</sup>C isotope incorporation was determined to be 60.4%.

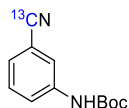

**2m** was purified on silica gel with a gradient of 0-60% EtOAc in hexanes, and obtained as a light-white solid in 46% yield. **<sup>1</sup>H NMR (500 MHz, DMSO-*d*<sub>6</sub>)** δ 9.73 (s, 1H), 7.88 (s, 1H), 7.71 (d, *J* = 8.2 Hz, 1H), 7.46 (t, *J* = 7.9 Hz, 1H), 7.44 – 7.36 (m, 1H), 1.48 (s, 9H). **<sup>13</sup>C NMR (126 MHz, DMSO)** δ 152.61, 140.45, 130.09, 125.49, 122.60, 120.46, 118.77, 111.50, 27.99. Mass spectral data was obtained under ESI positive ionization mode and the <sup>13</sup>C isotope incorporation was determined to be 40.4%.

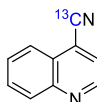

**2o** was purified on silica gel with a gradient of 0-100% EtOAc in hexanes, and obtained as a light tan solid in 71% yield. **<sup>1</sup>H NMR (500 MHz, DMSO-*d*<sub>6</sub>)** δ 9.09 (d, *J* = 3.6 Hz, 1H), 8.16 (d, *J* = 8.4 Hz, 1H), 8.14 – 8.05 (m, 2H), 7.97 – 7.90 (m, 1H), 7.87 – 7.81 (m, 1H). **<sup>13</sup>C NMR (126 MHz, DMSO)** δ 150.22, 147.22, 131.23, 129.91, 129.45, 125.83, 124.80, 124.38, 117.34, 115.53. Mass spectral data was obtained under ESI positive ionization mode and the <sup>13</sup>C isotope incorporation was determined to be 51.0%.

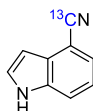

**2p** was purified on silica gel with a gradient of 0-100% EtOAc in hexanes, and obtained as a light tan solid in 58% yield. **<sup>1</sup>H NMR (500 MHz, DMSO-*d*<sub>6</sub>)** δ 11.73 (s, 1H), 7.77 (d, *J* = 8.2 Hz, 1H), 7.65 (t, *J* = 2.7 Hz, 1H), 7.55 – 7.49 (m, 1H), 7.24 (t, *J* = 7.8 Hz, 1H), 6.59 (s, 1H). **<sup>13</sup>C NMR (126 MHz, DMSO)** δ 135.62, 128.87, 128.50, 124.52, 120.94, 118.83, 116.88, 101.07, 99.40. Mass spectral data was obtained under ESI positive ionization mode and the <sup>13</sup>C isotope incorporation was determined to be 53.7%.

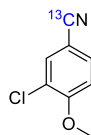

**2q** was purified on silica gel with a gradient of 0-60% EtOAc in hexanes, and obtained as an off-white solid in 47% yield. **<sup>1</sup>H NMR (500 MHz, DMSO-*d*<sub>6</sub>)** δ 8.03 – 7.95 (m, 1H), 7.82 (dd, *J* = 5.8, 2.8 Hz, 1H), 7.31 (d, *J* = 8.6 Hz, 1H), 3.95 (s, 3H). **<sup>13</sup>C NMR (126 MHz, DMSO)** δ 158.23, 133.31, 121.93, 119.10, 117.89, 113.52, 103.68, 56.73. Mass spectral data was obtained under ESI positive ionization mode and the <sup>13</sup>C isotope incorporation was determined to be 59.5%.

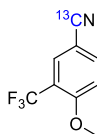

**2r** was purified on silica gel with a gradient of 0-60% EtOAc in hexanes, and obtained as a white solid in 79% yield. **<sup>1</sup>H NMR (500 MHz, DMSO-*d*<sub>6</sub>)** δ 8.16 – 8.09 (m, 2H), 7.45 (d, *J* = 8.6 Hz, 1H), 3.99 (s, 3H). **<sup>13</sup>C NMR (126 MHz, DMSO)** δ 160.28, 138.80, 131.21, 123.69, 119.36, 117.86, 114.17, 102.97, 56.91. Mass spectral data was obtained under ESI positive ionization mode and the <sup>13</sup>C isotope incorporation was determined to be 60.9%.

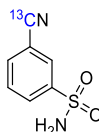

**2s** was purified on silica gel with a gradient of 0-100% EtOAc in hexanes, and obtained as a white solid in 42% yield. **<sup>1</sup>H NMR (500 MHz, DMSO-*d*<sub>6</sub>)** δ 8.22 (s, 1H), 8.14 – 8.07 (m, 2H), 7.81 (t, *J* = 7.9 Hz, 1H), 7.62 (s, 2H). **<sup>13</sup>C NMR (126 MHz, DMSO)** δ 145.24, 135.43, 130.58, 130.14, 129.20, 117.66, 112.10. Mass spectral data was obtained under ESI positive ionization mode and the <sup>13</sup>C isotope incorporation was determined to be 54.5%.

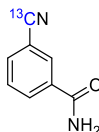

**2t** was purified on silica gel with a gradient of 0-100% EtOAc in hexanes, and obtained as a white solid in 74% yield. **<sup>1</sup>H NMR (500 MHz, DMSO-*d*<sub>6</sub>)** δ 8.28 (s, 1H), 8.17 (d, *J* = 8.1 Hz, 2H), 7.99 (d, *J* = 7.7 Hz, 1H), 7.71 – 7.58 (m, 2H). **<sup>13</sup>C NMR (126 MHz, DMSO)** δ 165.97, 135.30, 134.70, 132.21, 131.06, 129.70, 118.37, 111.45. Mass spectral data was obtained under ESI positive ionization mode and the <sup>13</sup>C isotope incorporation was determined to be 44.4%.

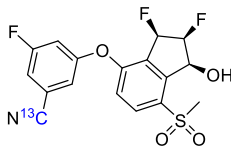

**4a** was purified on silica gel with a gradient of 20-100% EtOAc in hexanes. The obtained solid was washed with CH<sub>2</sub>Cl<sub>2</sub>, and then redissolved in acetone. Solvent was removed under reduced pressure, affording a white solid in 89% yield. **<sup>1</sup>H NMR (500 MHz, DMSO-*d*<sub>6</sub>)** δ 8.03 (d, *J* = 8.6 Hz, 1H), 7.80 (d, *J* = 7.3 Hz, 1H), 7.62 (s, 1H), 7.58 (d, *J* = 9.7 Hz, 1H), 7.25 (d, *J* = 8.7 Hz, 1H), 6.19 (d, *J* = 5.9 Hz, 1H), 5.98 (dd, *J* = 56.2, 4.6 Hz, 1H), 5.60 (s, 1H), 5.20 (ddt, *J* = 47.9, 16.9, 4.9 Hz, 1H), 3.36 (s, 3H). **<sup>13</sup>C NMR (126 MHz, DMSO)** δ 163.56, 161.58, 157.49, 156.42, 144.28, 134.42, 133.33, 128.74, 120.05, 118.56, 116.41, 114.34, 113.45, 89.57, 87.99, 87.10, 85.74, 69.34, 44.98. Mass spectral data was obtained under ESI positive ionization mode and the <sup>13</sup>C isotope incorporation was determined to be 47.1%.

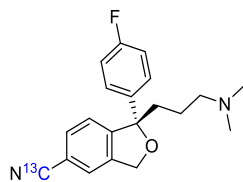

**4b** was purified on a reversed-phase C18 column, eluting with 60% acetonitrile/40% water solution (50 mM TEAA pH 11), and obtained as a clear viscous oil in 41% yield.  $^1\text{H}$  NMR (500 MHz, DMSO- $d_6$ )  $\delta$  7.80 – 7.72 (m, 3H), 7.58 (dd,  $J$  = 8.7, 5.5 Hz, 2H), 7.14 (t,  $J$  = 8.8 Hz, 2H), 5.21 – 5.09 (m, 2H), 2.15 (dt,  $J$  = 14.0, 6.1 Hz, 4H), 2.01 (s, 6H), 1.28 (dq,  $J$  = 11.7, 6.0 Hz, 1H), 1.19 (dq,  $J$  = 13.2, 6.0 Hz, 1H).  $^{13}\text{C}$  NMR (126 MHz, DMSO)  $\delta$  162.18, 149.43, 140.47, 139.86, 131.95, 126.94, 125.60, 123.11, 118.77, 115.11, 110.75, 90.59, 70.98, 58.73, 44.93, 38.22, 21.76. Mass spectral data was obtained under ESI positive ionization mode and the  $^{13}\text{C}$  isotope incorporation was determined to be 56.9%.

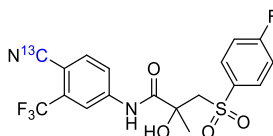

**4c** was purified on silica gel with a gradient of 0-10% MeOH in  $\text{CH}_2\text{Cl}_2$ , and obtained as a white solid in 57% yield.  $^1\text{H}$  NMR (500 MHz, DMSO- $d_6$ )  $\delta$  10.38 (s, 1H), 8.43 (s, 1H), 8.22 (d,  $J$  = 8.6 Hz, 1H), 8.08 (d,  $J$  = 8.6 Hz, 1H), 7.93 (dd,  $J$  = 8.7, 5.2 Hz, 2H), 7.37 (t,  $J$  = 8.8 Hz, 2H), 6.40 (s, 1H), 3.96 (d,  $J$  = 14.8 Hz, 1H), 3.72 (d,  $J$  = 14.9 Hz, 1H), 1.42 (s, 3H).  $^{13}\text{C}$  NMR (126 MHz, DMSO)  $\delta$  173.72, 163.87, 143.16, 137.16, 136.16, 131.34, 123.60, 122.86, 117.55, 116.13, 115.81, 101.97, 73.14, 63.48, 27.16. Mass spectral data was obtained under ESI positive ionization mode and the  $^{13}\text{C}$  isotope incorporation was determined to be 48.7%.

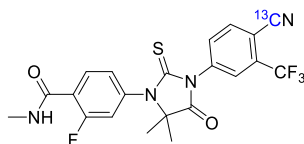

**4d** was purified on a reversed-phase C18 column, eluting with a gradient of 10-80% acetonitrile in water, and obtained as a white solid in 13% yield.  $^1\text{H}$  NMR (500 MHz, DMSO- $d_6$ )  $\delta$  8.43 (d,  $J$  = 4.4 Hz, 1H), 8.40 (d,  $J$  = 8.3 Hz, 1H), 8.30 – 8.28 (m, 1H), 8.08 (dd,  $J$  = 8.2, 1.4 Hz, 1H), 7.79 (t,  $J$  = 8.1 Hz, 1H), 7.43 (dd,  $J$  = 10.7, 1.5 Hz, 1H), 7.33 (dd,  $J$  = 8.2, 1.7 Hz, 1H), 2.80 (d,  $J$  = 4.5 Hz, 3H), 1.54 (s, 6H).  $^{13}\text{C}$  NMR (126 MHz, DMSO)  $\delta$  180.05, 174.70, 163.39, 157.89, 138.21, 137.91, 136.26, 133.94, 130.97, 130.85, 127.96, 126.08, 121.10, 118.10, 117.90, 114.98, 108.70, 66.57, 26.25, 22.93. Mass spectral data was obtained under ESI positive ionization mode and the  $^{13}\text{C}$  isotope incorporation was determined to be 13.5%.

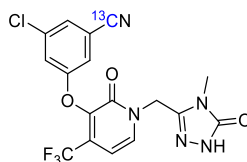

**4e** was purified on a reversed-phase C18 column, eluting with 40% acetonitrile solution (0.1 % (v/v) formic acid)/60% water solution (0.1 % (v/v) formic acid), and obtained as a white solid in 28% yield.  $^1\text{H}$  NMR (500 MHz, DMSO- $d_6$ )  $\delta$  11.73 (s, 1H), 7.88 (d,  $J$  = 7.3 Hz, 1H), 7.76 – 7.72 (m, 1H), 7.63 – 7.59 (m, 1H), 7.53 (d,  $J$  = 1.9 Hz, 1H), 6.66 (d,  $J$  = 7.3 Hz, 1H), 5.17 (s, 2H), 3.11 (s, 3H).  $^{13}\text{C}$  NMR (126 MHz, DMSO)  $\delta$  157.23, 156.04, 155.01, 143.24, 140.09, 137.33, 134.95, 129.97, 126.51, 122.74, 120.56, 118.42, 116.90, 113.64, 100.17, 43.34, 26.70. Mass spectral data was obtained under ESI positive ionization mode and the  $^{13}\text{C}$  isotope incorporation was determined to be 68.0%.

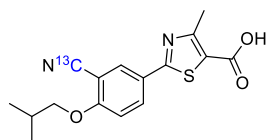

**4f** was purified on silica gel with a gradient of 0-10% MeOH in CH<sub>2</sub>Cl<sub>2</sub>, and obtained as a white solid in 54% yield. **<sup>1</sup>H NMR (500 MHz, DMSO-*d*<sub>6</sub>)** δ 13.37 (s, 1H), 8.23 (t, *J* = 2.6 Hz, 1H), 8.18 (dd, *J* = 8.9, 2.2 Hz, 1H), 7.33 (d, *J* = 9.0 Hz, 1H), 3.98 (d, *J* = 6.5 Hz, 2H), 2.64 (s, 3H), 2.08 (dt, *J* = 13.3, 6.6 Hz, 1H), 1.02 (s, 3H), 1.01 (s, 3H). **<sup>13</sup>C NMR (126 MHz, DMSO)** δ 166.15, 162.78, 162.01, 159.50, 132.98, 131.46, 125.32, 122.84, 115.33, 113.81, 101.52, 75.10, 27.57, 18.68, 17.00. Mass spectral data was obtained under ESI positive ionization mode and the <sup>13</sup>C isotope incorporation was determined to be 45.1%.

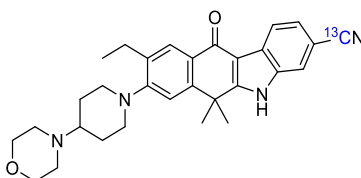

**4g** was purified on a reversed-phase C18 column, eluting with 60% acetonitrile solution (0.1 % (v/v) formic acid)/40% water solution (0.1 % (v/v) formic acid), and obtained as a white solid in 58% yield. **<sup>1</sup>H NMR (500 MHz, DMSO-*d*<sub>6</sub>)** δ 12.68 (s, 1H), 8.32 (d, *J* = 8.1 Hz, 1H), 8.04 (s, 1H), 7.99 (s, 1H), 7.63 – 7.57 (m, 1H), 7.33 (s, 1H), 3.63 – 3.57 (m, 4H), 3.21 (d, *J* = 11.8 Hz, 2H), 2.76 (t, *J* = 11.4 Hz, 2H), 2.70 (q, *J* = 7.5 Hz, 2H), 2.52 (s, 4H), 2.36 – 2.29 (m, 1H), 1.91 (d, *J* = 11.6 Hz, 2H), 1.75 (s, 6H), 1.63 – 1.55 (m, 2H), 1.27 (t, *J* = 7.5 Hz, 3H). **<sup>13</sup>C NMR (126 MHz, DMSO)** δ 179.14, 159.98, 155.46, 146.70, 136.21, 135.61, 127.68, 126.00, 125.83, 124.73, 121.59, 120.06, 116.38, 116.32, 109.35, 104.52, 66.56, 61.10, 51.59, 49.46, 36.40, 30.04, 28.43, 22.59, 14.33. Mass spectral data was obtained under ESI positive ionization mode and the <sup>13</sup>C isotope incorporation was determined to be 55.9%.

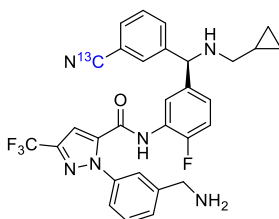

**4h** was purified on silica gel with a gradient of 0-1000% MeOH in CH<sub>2</sub>Cl<sub>2</sub>, and obtained as a white solid in 43% yield. **<sup>1</sup>H NMR (500 MHz, DMSO-*d*<sub>6</sub>)** δ 10.32 (s, 1H), 7.88 (s, 1H), 7.73 (d, *J* = 7.0 Hz, 1H), 7.65 (dt, *J* = 13.6, 7.6 Hz, 2H), 7.58 (d, *J* = 8.5 Hz, 1H), 7.52 (dt, *J* = 15.6, 7.3 Hz, 2H), 7.44 (d, *J* = 6.9 Hz, 2H), 7.38 – 7.32 (m, 2H), 7.22 (t, *J* = 9.3 Hz, 1H), 4.94 (d, *J* = 4.4 Hz, 1H), 3.81 (s, 2H), 2.92 (s, 3H), 2.31 – 2.22 (m, 2H), 0.95 – 0.86 (m, 1H), 0.42 – 0.35 (m, 2H), 0.09 – 0.02 (m, 2H). **<sup>13</sup>C NMR (126 MHz, DMSO)** δ 156.79, 155.15, 153.19, 146.11, 144.87, 140.95, 140.23, 138.97, 138.55, 132.04, 130.62, 130.48, 129.61, 128.60, 127.76, 125.89, 124.58, 124.23, 123.43, 122.80, 122.11, 119.97, 118.86, 115.92, 115.77, 111.29, 107.47, 64.22, 51.94, 44.76, 10.96, 3.34, 3.32. Mass spectral data was obtained under ESI positive ionization mode and the <sup>13</sup>C isotope incorporation was determined to be 67.2%.

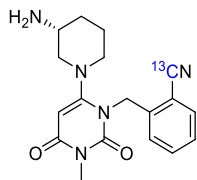

**4i** was purified on a reversed-phase C18 column, eluting with 40% acetonitrile solution (0.1 % (v/v) formic acid)/ 60% water solution (0.1 % (v/v) formic acid). The white solid was redissolved in in  $\text{CH}_2\text{Cl}_2$ , and the solvent was removed under reduced pressure to the title compound in 58% yield.  **$^1\text{H}$  NMR (500 MHz,  $\text{DMSO}-d_6$ )**  $\delta$  7.85 – 7.81 (m, 1H), 7.65 (t,  $J$  = 7.7 Hz, 1H), 7.46 (t,  $J$  = 7.6 Hz, 1H), 7.22 (d,  $J$  = 7.9 Hz, 1H), 5.32 (s, 1H), 5.17 (s, 2H), 3.09 (s, 3H), 3.04 (d,  $J$  = 11.0 Hz, 1H), 2.94 (d,  $J$  = 12.1 Hz, 1H), 2.70 (t,  $J$  = 9.0 Hz, 1H), 2.59 (t,  $J$  = 10.4 Hz, 1H), 2.40 – 2.31 (m, 1H), 1.80 – 1.74 (m, 1H), 1.66 (dd,  $J$  = 9.7, 3.8 Hz, 1H), 1.48 – 1.37 (m, 1H), 1.11 (q,  $J$  = 9.6 Hz, 1H).  **$^{13}\text{C}$  NMR (126 MHz,  $\text{DMSO}$ )**  $\delta$  162.17, 159.75, 151.99, 141.20, 133.53, 133.03, 127.87, 126.91, 117.22, 117.12, 109.92, 58.82, 50.98, 48.56, 47.11, 45.81, 32.59, 27.33, 22.91. Mass spectral data was obtained under ESI positive ionization mode and the  $^{13}\text{C}$  isotope incorporation was determined to be 68.9%.

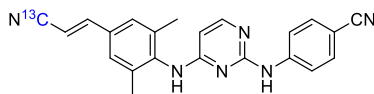

**4j** was purified on silica gel with a gradient of 0-10% MeOH in  $\text{CH}_2\text{Cl}_2$ , and obtained as a white solid in 50% yield.  **$^1\text{H}$  NMR (500 MHz,  $\text{DMSO}-d_6$ )**  $\delta$  9.59 (s, 1H), 8.92 (s, 1H), 8.01 (d,  $J$  = 5.3 Hz, 1H), 7.63 (dq,  $J$  = 12.8, 4.2 Hz, 2H), 7.48 (s, 4H), 6.45 (d,  $J$  = 16.7 Hz, 1H), 6.33 (s, 1H), 2.17 (s, 6H).  **$^{13}\text{C}$  NMR (126 MHz,  $\text{DMSO}$ )**  $\delta$  161.70, 159.19, 155.97, 150.30, 145.50, 139.13, 136.50, 132.50, 131.80, 127.42, 119.68, 118.97, 117.93, 117.86, 101.36, 98.61, 96.13, 18.24. Mass spectral data was obtained under ESI positive ionization mode and the  $^{13}\text{C}$  isotope incorporation was determined to be 53.3%.



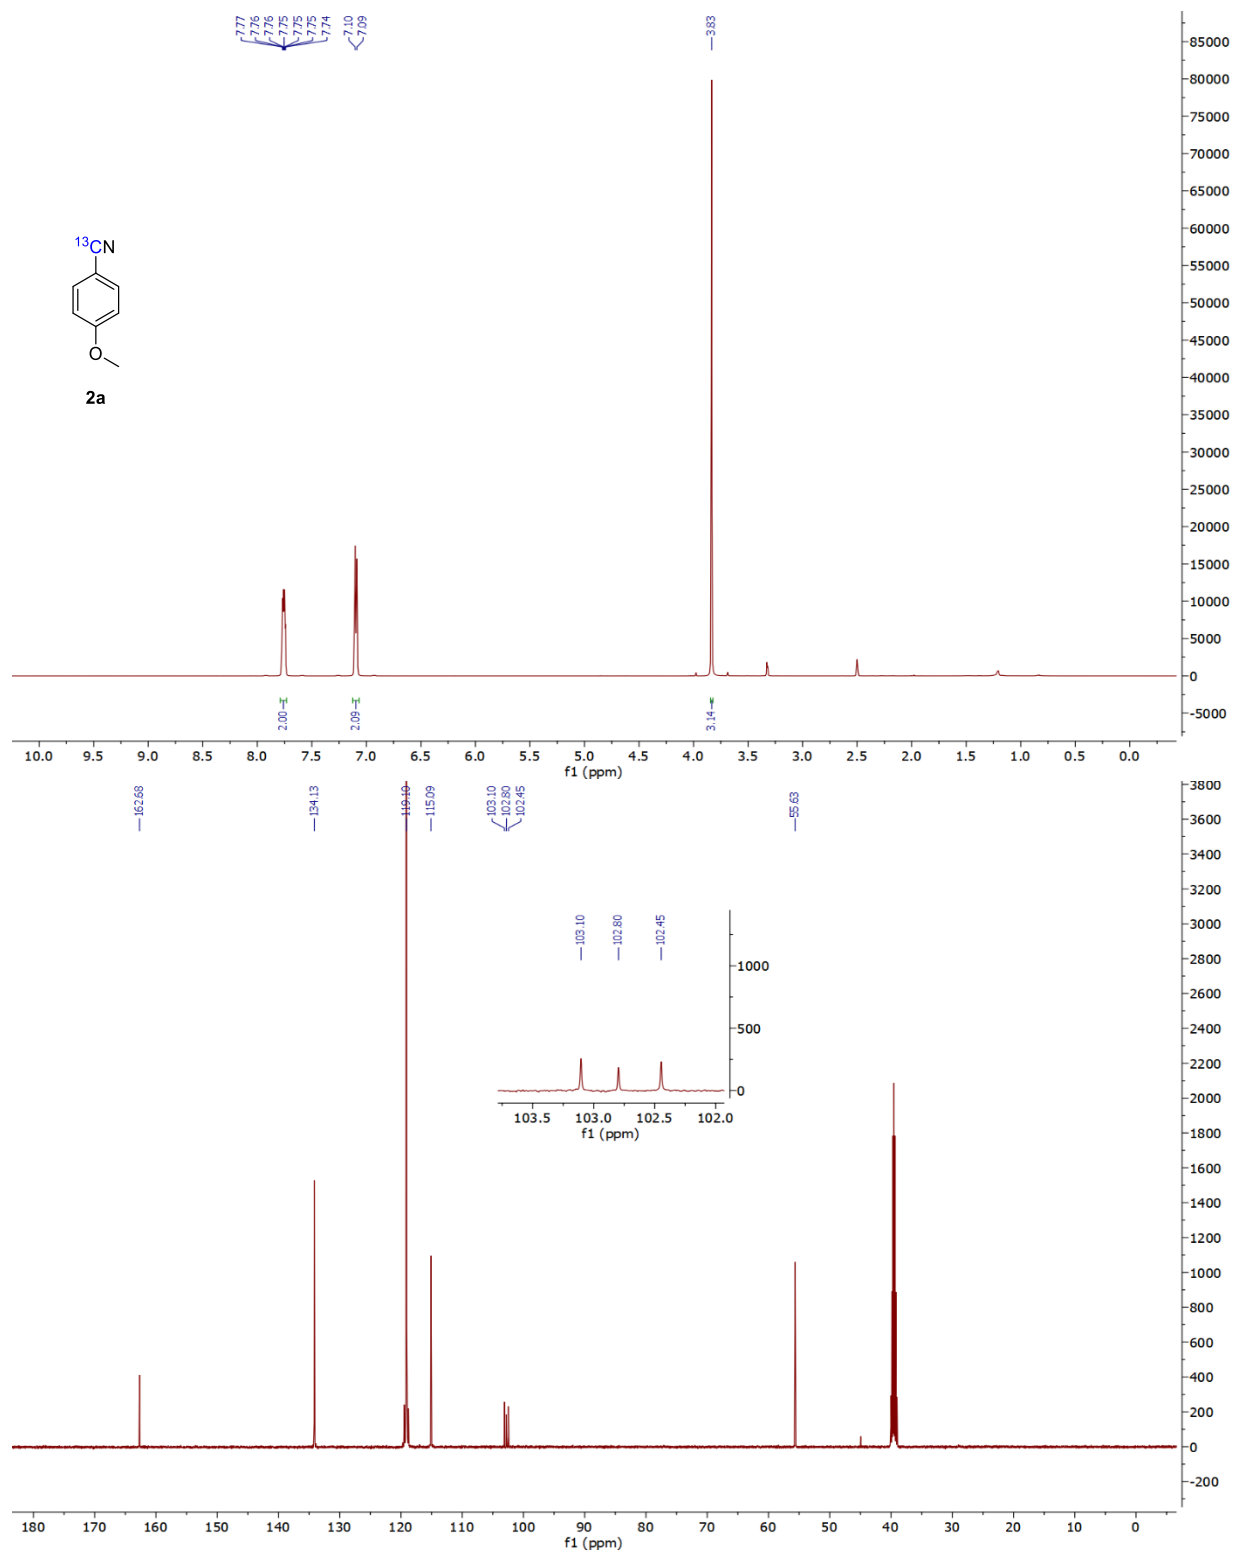

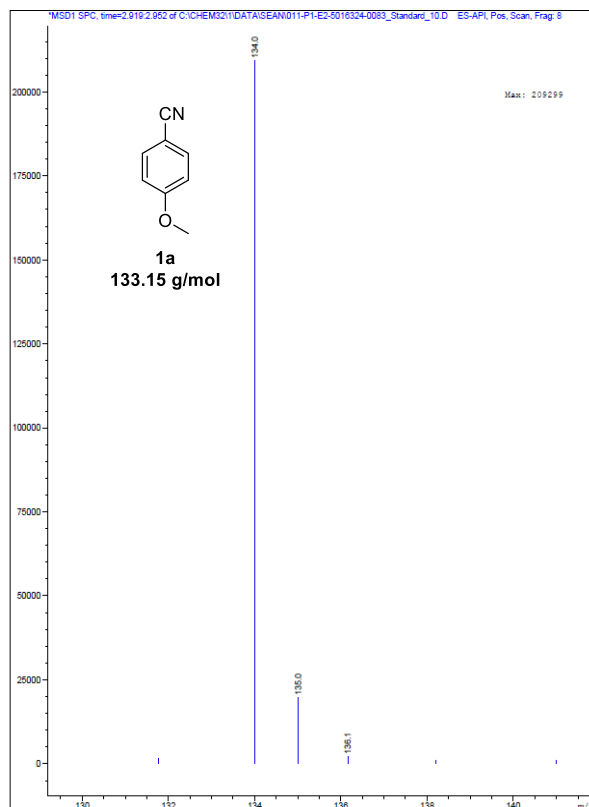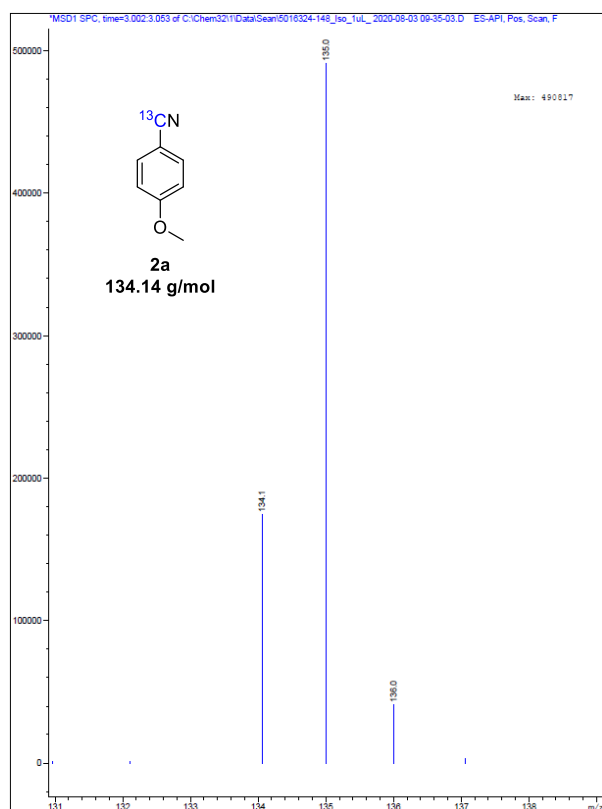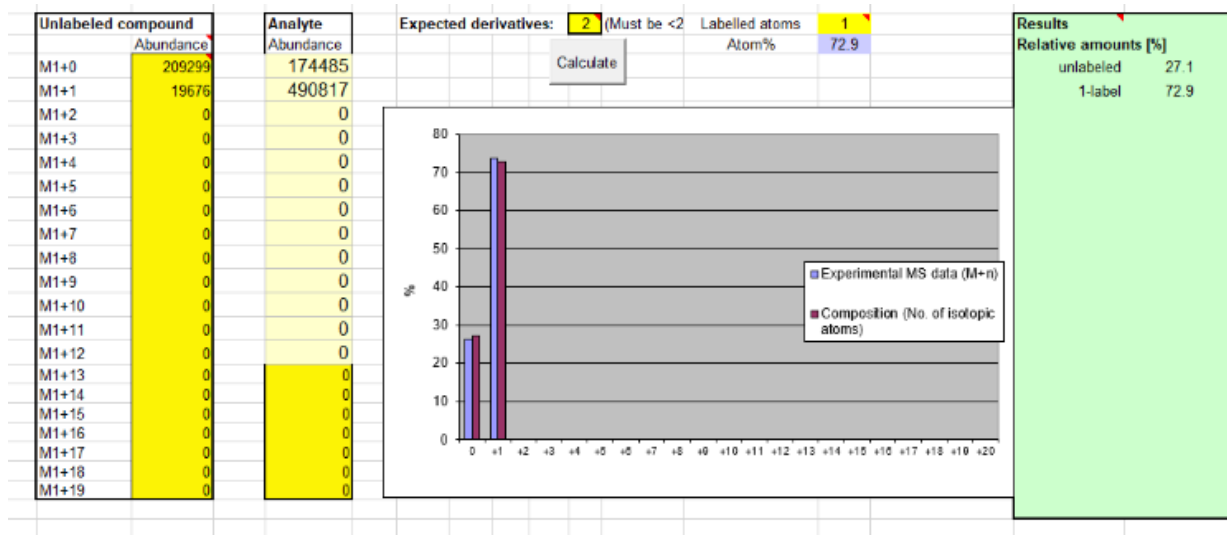

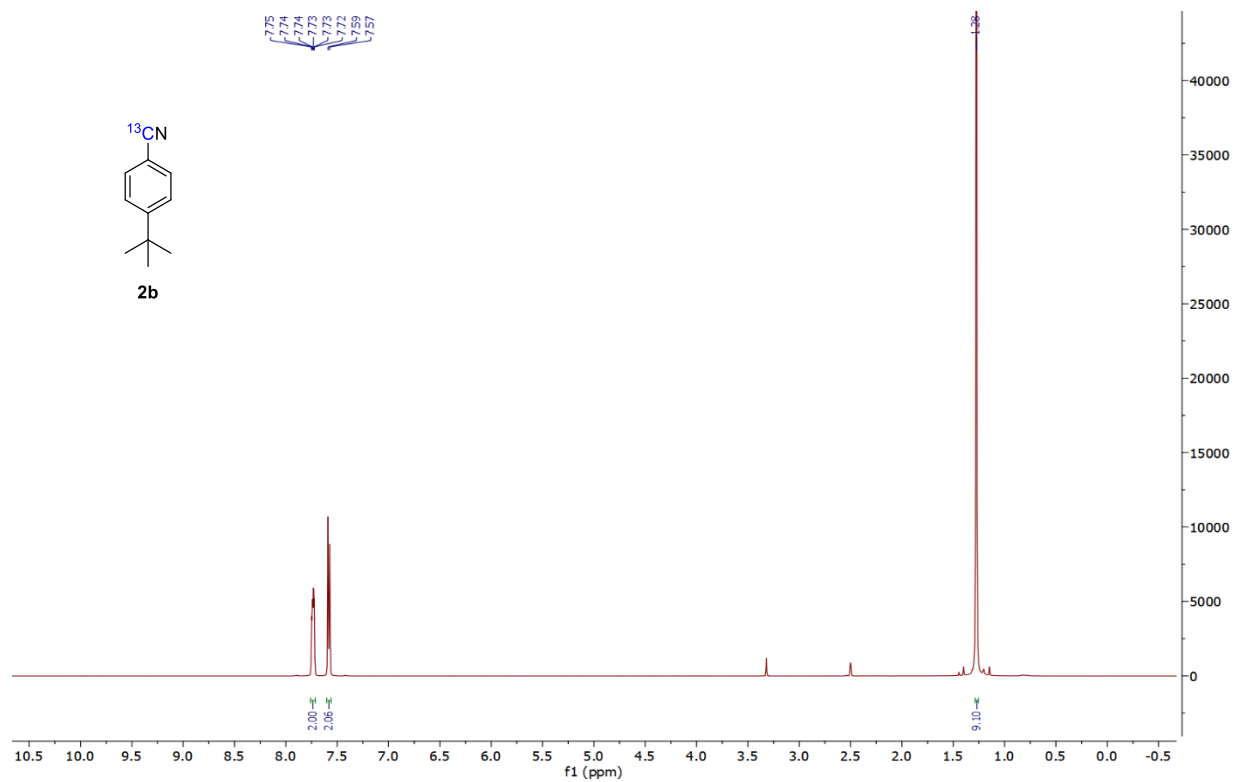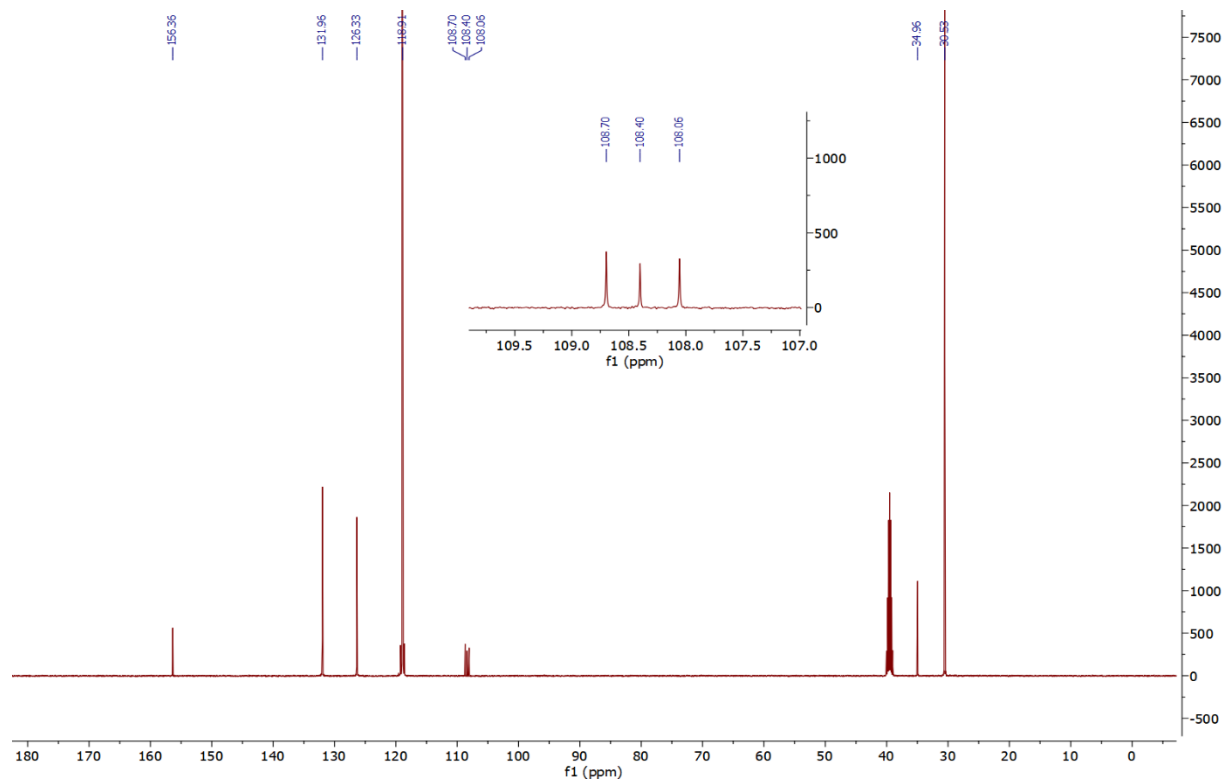

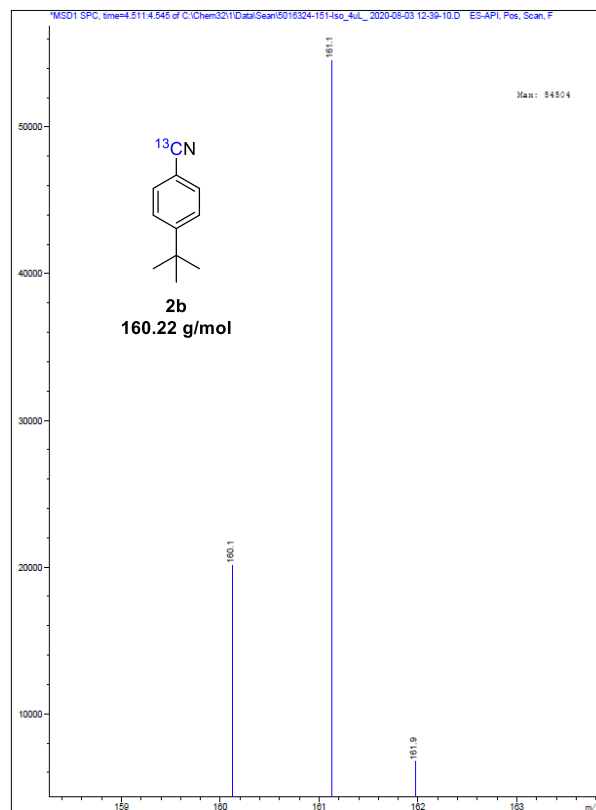

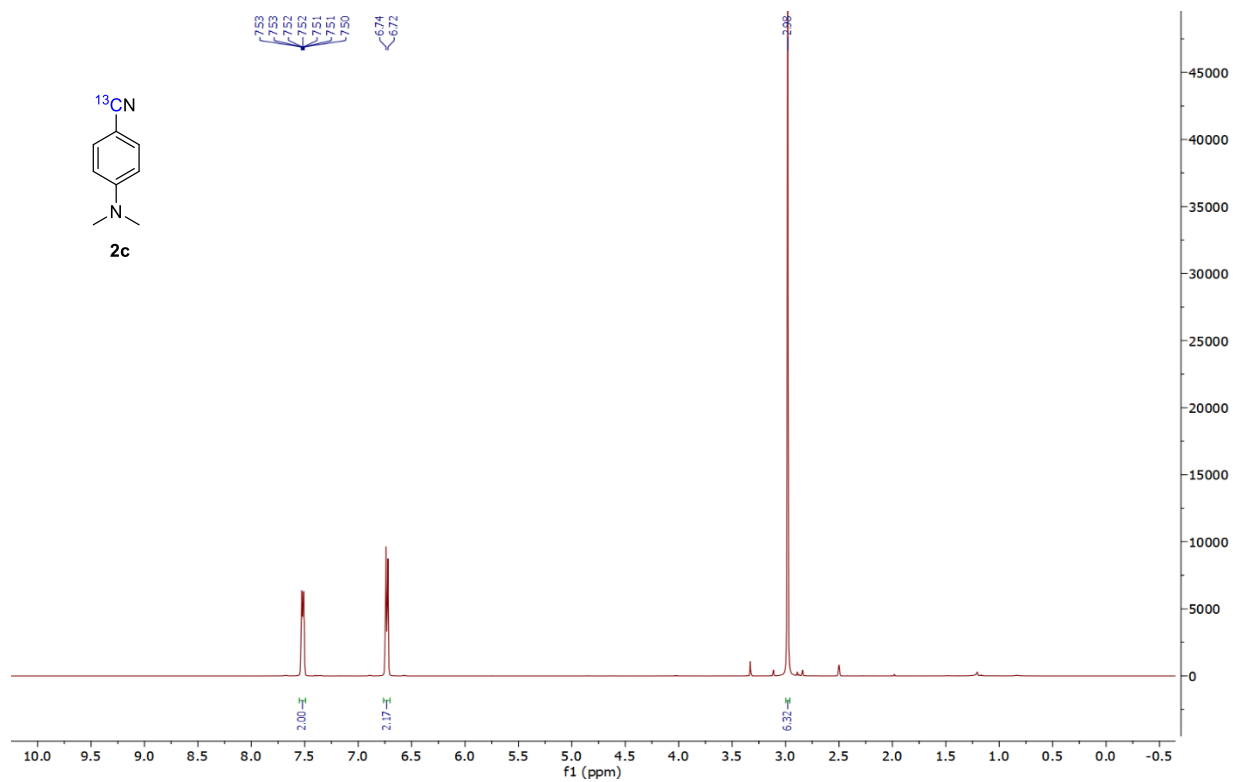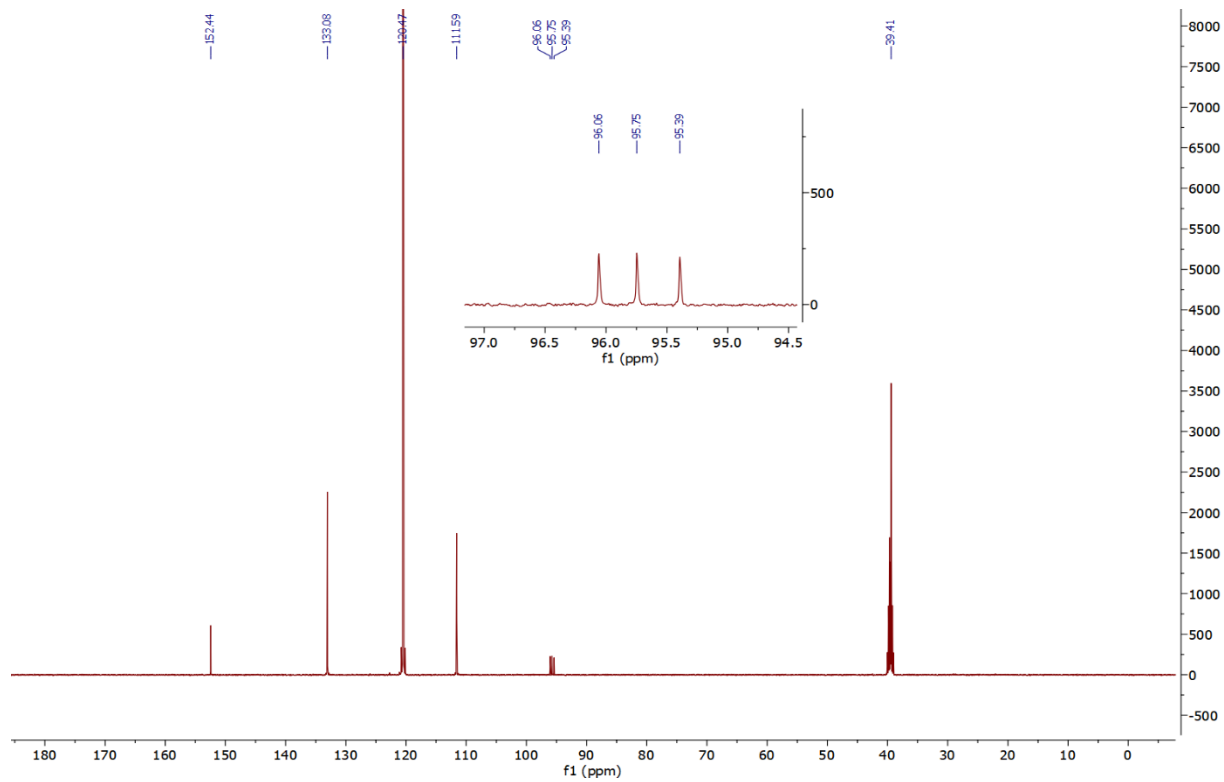

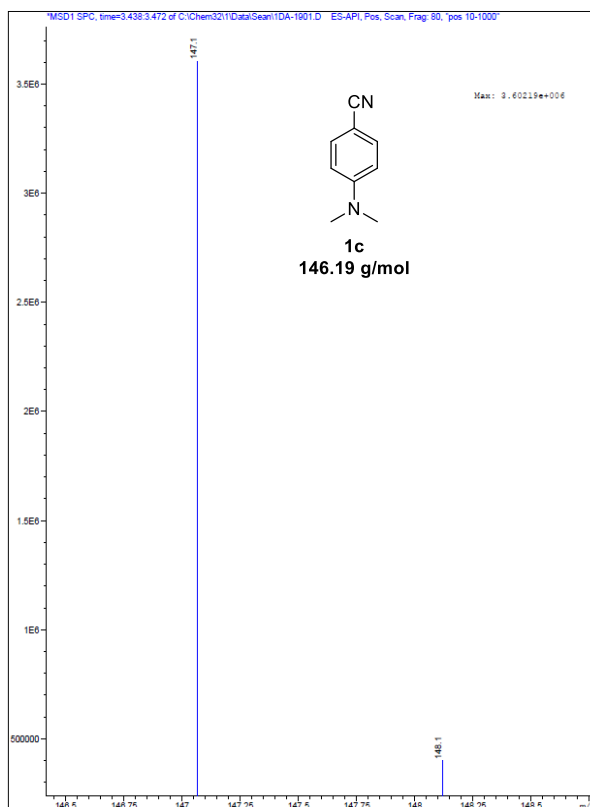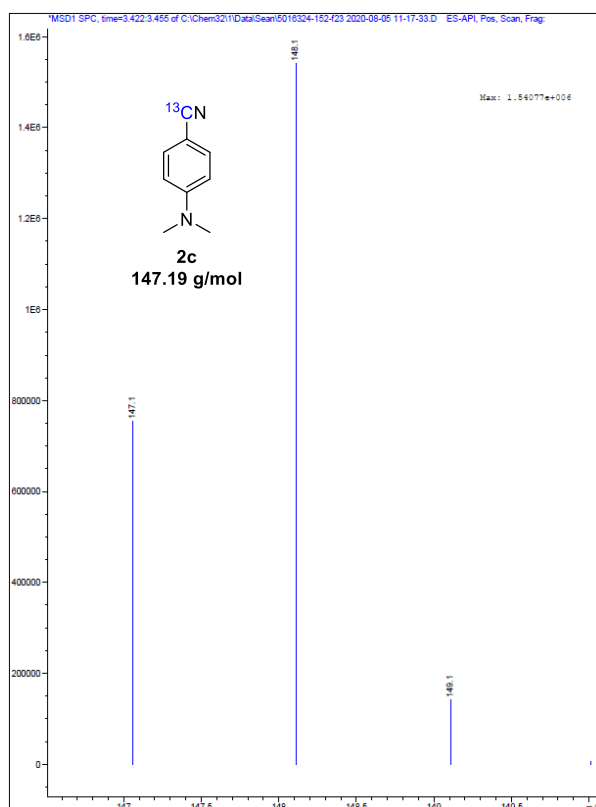

| Unlabeled compound | Abundance |
|--------------------|-----------|
| M1+0               | 3602192   |
| M1+1               | 398624    |
| M1+2               | 0         |
| M1+3               | 0         |
| M1+4               | 0         |
| M1+5               | 0         |
| M1+6               | 0         |
| M1+7               | 0         |
| M1+8               | 0         |
| M1+9               | 0         |
| M1+10              | 0         |
| M1+11              | 0         |
| M1+12              | 0         |
| M1+13              | 0         |
| M1+14              | 0         |
| M1+15              | 0         |
| M1+16              | 0         |
| M1+17              | 0         |
| M1+18              | 0         |
| M1+19              | 0         |

| Analyte | Abundance |
|---------|-----------|
| M1+0    | 755010    |
| M1+1    | 1540769   |
| M1+2    | 0         |
| M1+3    | 0         |
| M1+4    | 0         |
| M1+5    | 0         |
| M1+6    | 0         |
| M1+7    | 0         |
| M1+8    | 0         |
| M1+9    | 0         |
| M1+10   | 0         |
| M1+11   | 0         |
| M1+12   | 0         |
| M1+13   | 0         |
| M1+14   | 0         |
| M1+15   | 0         |
| M1+16   | 0         |
| M1+17   | 0         |
| M1+18   | 0         |
| M1+19   | 0         |

Expected derivatives: 2 (Must be <2)

Calculate

Labelled atoms

1

Atom%

65.5

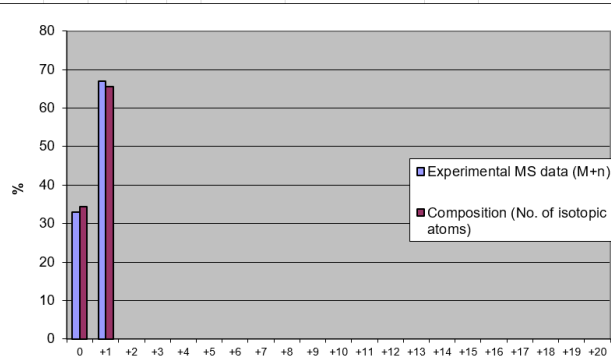

Results

Relative amounts [%]

|           |      |
|-----------|------|
| unlabeled | 34.5 |
| 1-label   | 65.5 |

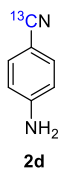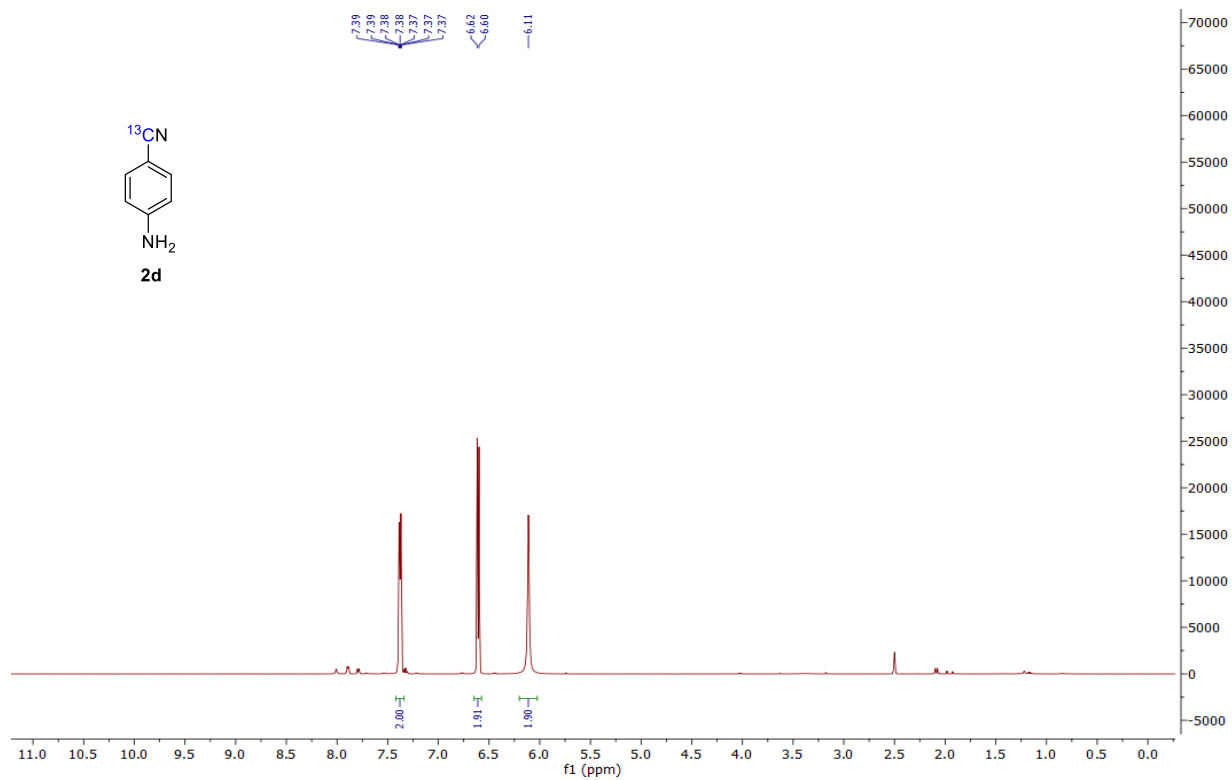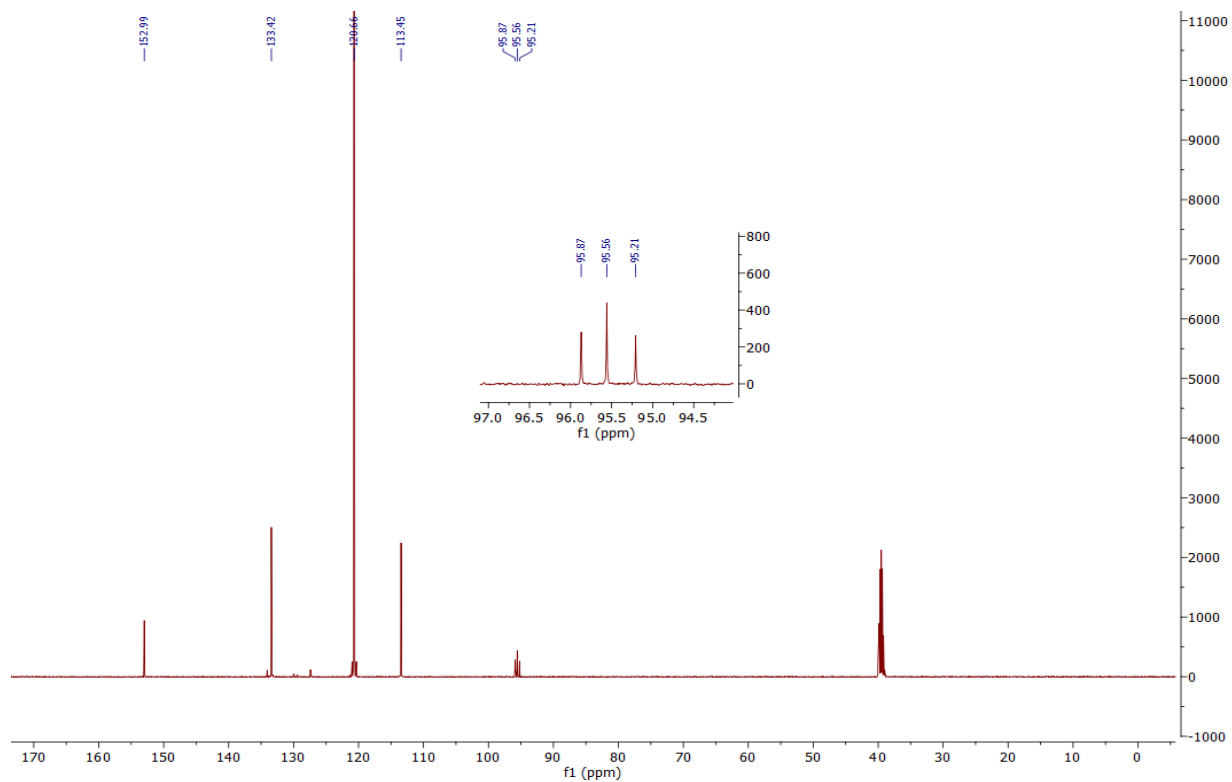

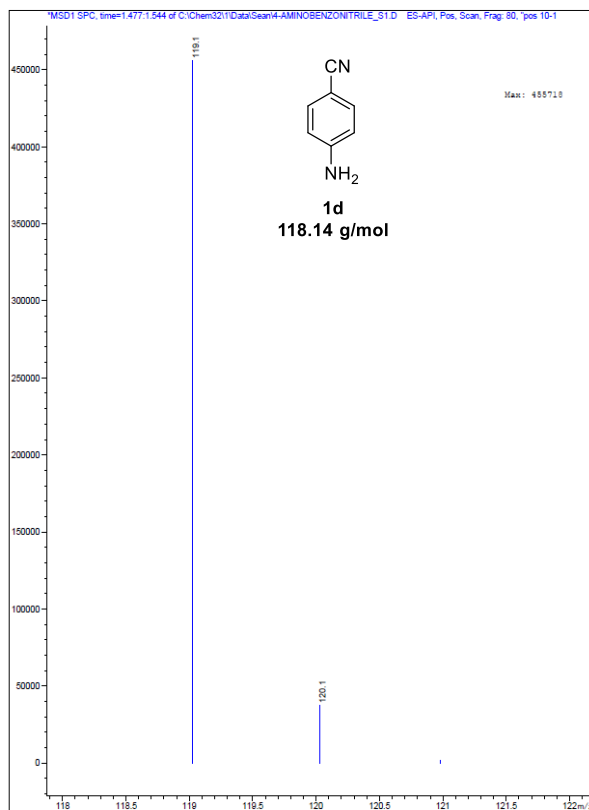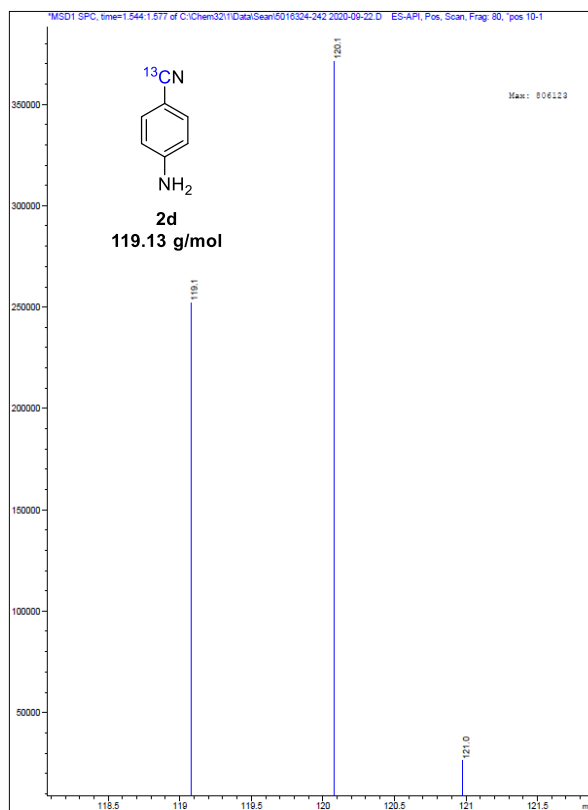

| Unlabeled compound |           | Analyte   | Expected derivatives: | 2 (Must be <2) | Labelled atoms | 1    | Results              |      |
|--------------------|-----------|-----------|-----------------------|----------------|----------------|------|----------------------|------|
|                    | Abundance | Abundance |                       |                | Atom%          | 58.2 | Relative amounts [%] |      |
| M1+0               | 455718    | 227776    |                       |                |                |      | unlabeled            | 41.8 |
| M1+1               | 37702     | 337968    |                       |                |                |      | 1-label              | 58.2 |
| M1+2               | 0         | 0         |                       |                |                |      |                      |      |
| M1+3               | 0         | 0         |                       |                |                |      |                      |      |
| M1+4               | 0         | 0         |                       |                |                |      |                      |      |
| M1+5               | 0         | 0         |                       |                |                |      |                      |      |
| M1+6               | 0         | 0         |                       |                |                |      |                      |      |
| M1+7               | 0         | 0         |                       |                |                |      |                      |      |
| M1+8               | 0         | 0         |                       |                |                |      |                      |      |
| M1+9               | 0         | 0         |                       |                |                |      |                      |      |
| M1+10              | 0         | 0         |                       |                |                |      |                      |      |
| M1+11              | 0         | 0         |                       |                |                |      |                      |      |
| M1+12              | 0         | 0         |                       |                |                |      |                      |      |
| M1+13              | 0         | 0         |                       |                |                |      |                      |      |
| M1+14              | 0         | 0         |                       |                |                |      |                      |      |
| M1+15              | 0         | 0         |                       |                |                |      |                      |      |
| M1+16              | 0         | 0         |                       |                |                |      |                      |      |
| M1+17              | 0         | 0         |                       |                |                |      |                      |      |
| M1+18              | 0         | 0         |                       |                |                |      |                      |      |
| M1+19              | 0         | 0         |                       |                |                |      |                      |      |

Calculate

Experimental MS data (M+n)

Composition (No. of isotopic atoms)



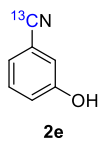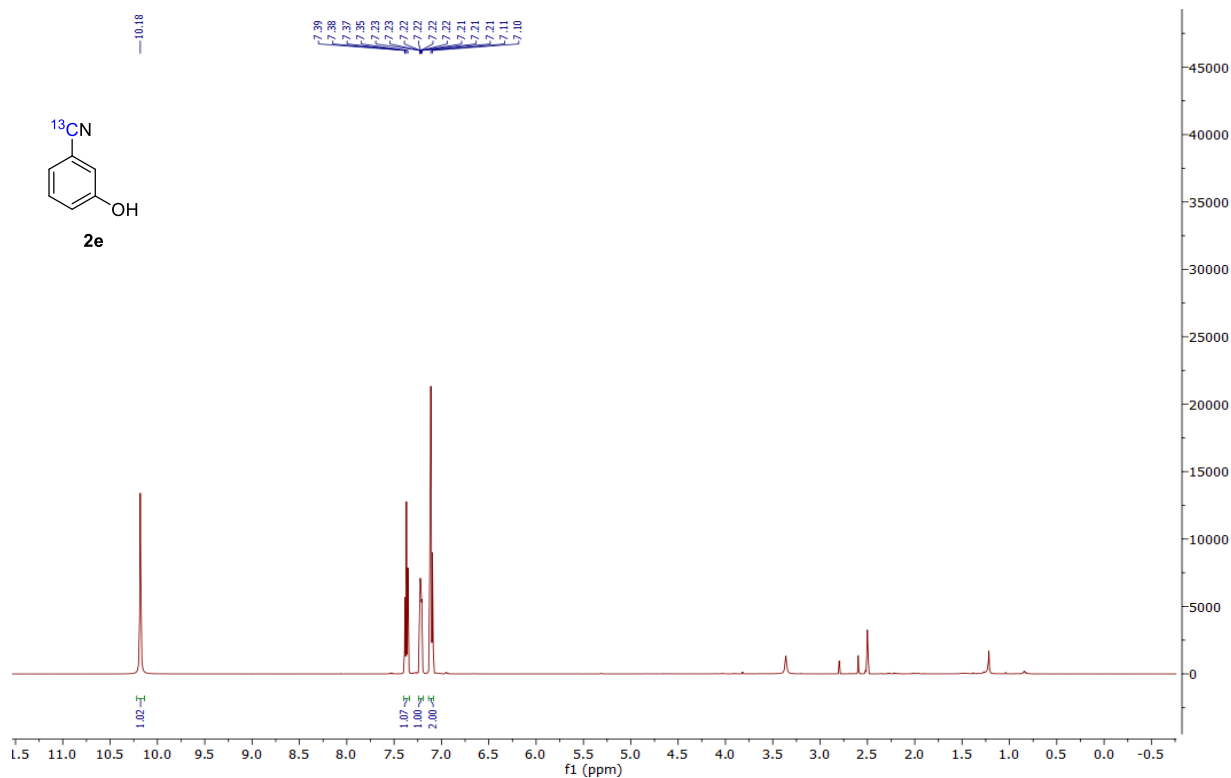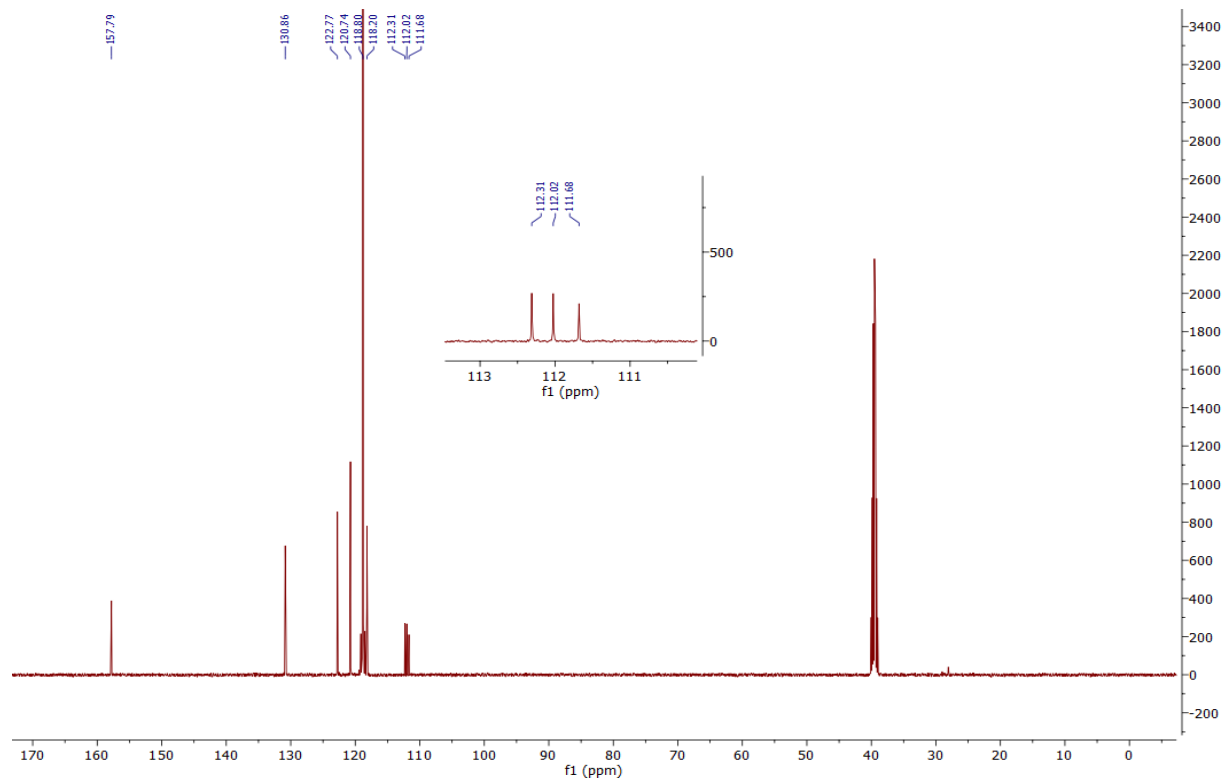

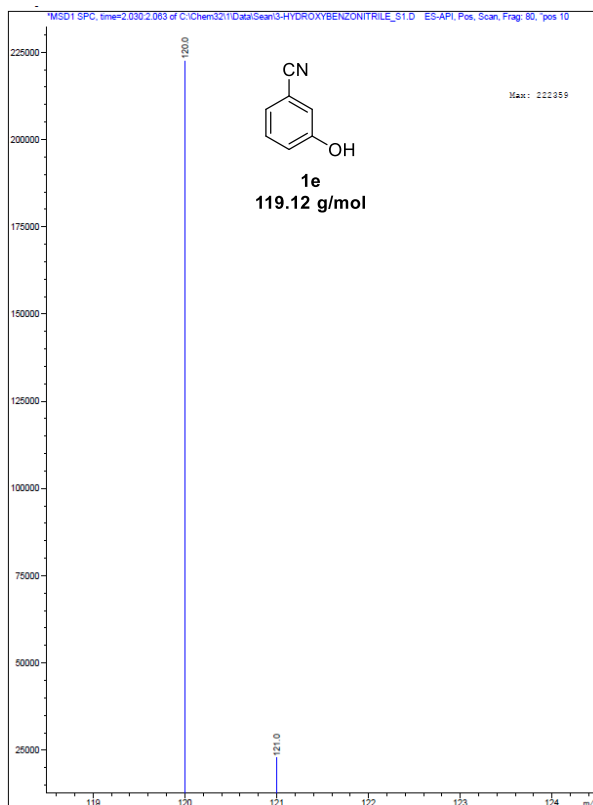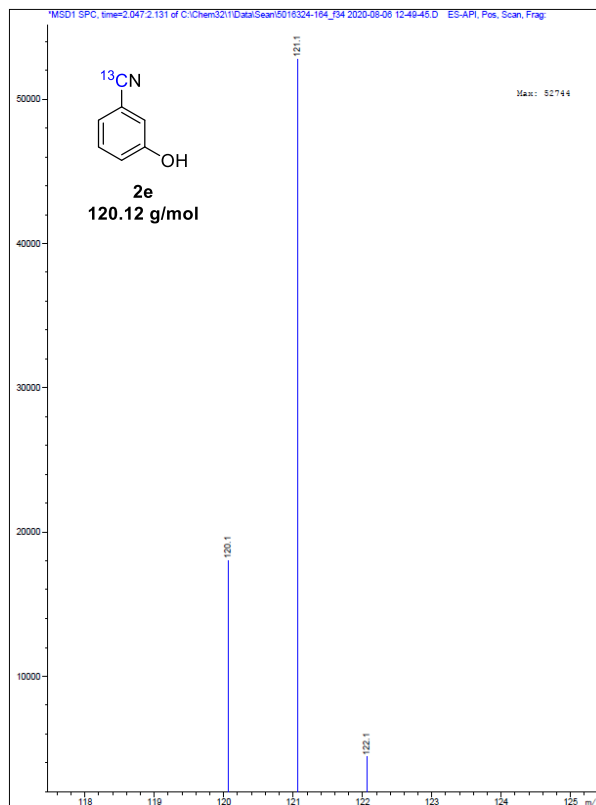

| Unlabeled compound |        | Analyte   | Expected derivatives: | 2 | (Must be <2) | Labelled atoms | 1    |
|--------------------|--------|-----------|-----------------------|---|--------------|----------------|------|
| Abundance          |        | Abundance |                       |   |              | Atom%          | 73.6 |
| M1+0               | 222359 | 18022.7   | Calculate             |   |              |                |      |
| M1+1               | 22718  | 52743.7   |                       |   |              |                |      |
| M1+2               | 0      | 0         |                       |   |              |                |      |
| M1+3               | 0      | 0         |                       |   |              |                |      |
| M1+4               | 0      | 0         |                       |   |              |                |      |
| M1+5               | 0      | 0         |                       |   |              |                |      |
| M1+6               | 0      | 0         |                       |   |              |                |      |
| M1+7               | 0      | 0         |                       |   |              |                |      |
| M1+8               | 0      | 0         |                       |   |              |                |      |
| M1+9               | 0      | 0         |                       |   |              |                |      |
| M1+10              | 0      | 0         |                       |   |              |                |      |
| M1+11              | 0      | 0         |                       |   |              |                |      |
| M1+12              | 0      | 0         |                       |   |              |                |      |
| M1+13              | 0      | 0         |                       |   |              |                |      |
| M1+14              | 0      | 0         |                       |   |              |                |      |
| M1+15              | 0      | 0         |                       |   |              |                |      |
| M1+16              | 0      | 0         |                       |   |              |                |      |
| M1+17              | 0      | 0         |                       |   |              |                |      |
| M1+18              | 0      | 0         |                       |   |              |                |      |
| M1+19              | 0      | 0         |                       |   |              |                |      |

  

| Results              |      |
|----------------------|------|
| Relative amounts [%] |      |
| unlabeled            | 26.4 |
| 1-label              | 73.6 |

  

Legend:   
 ■ Experimental MS data (M+n)   
 ■ Composition (No. of isotopic atoms)

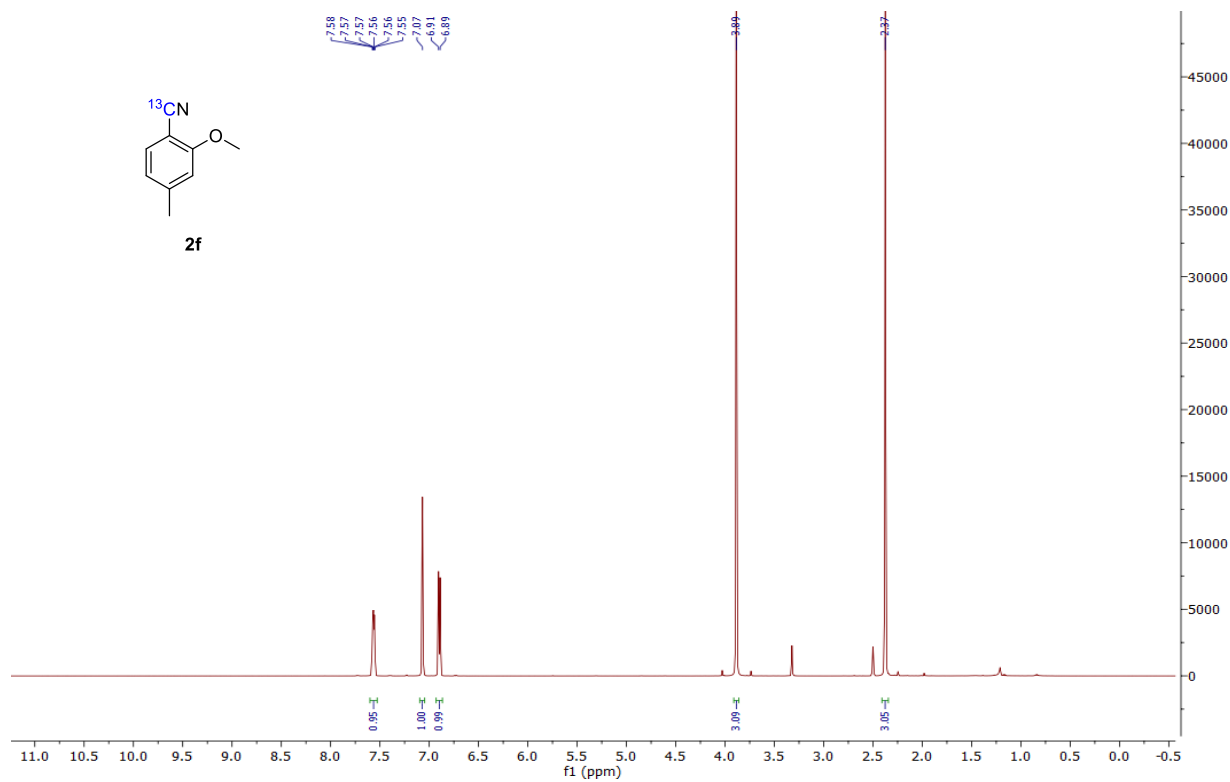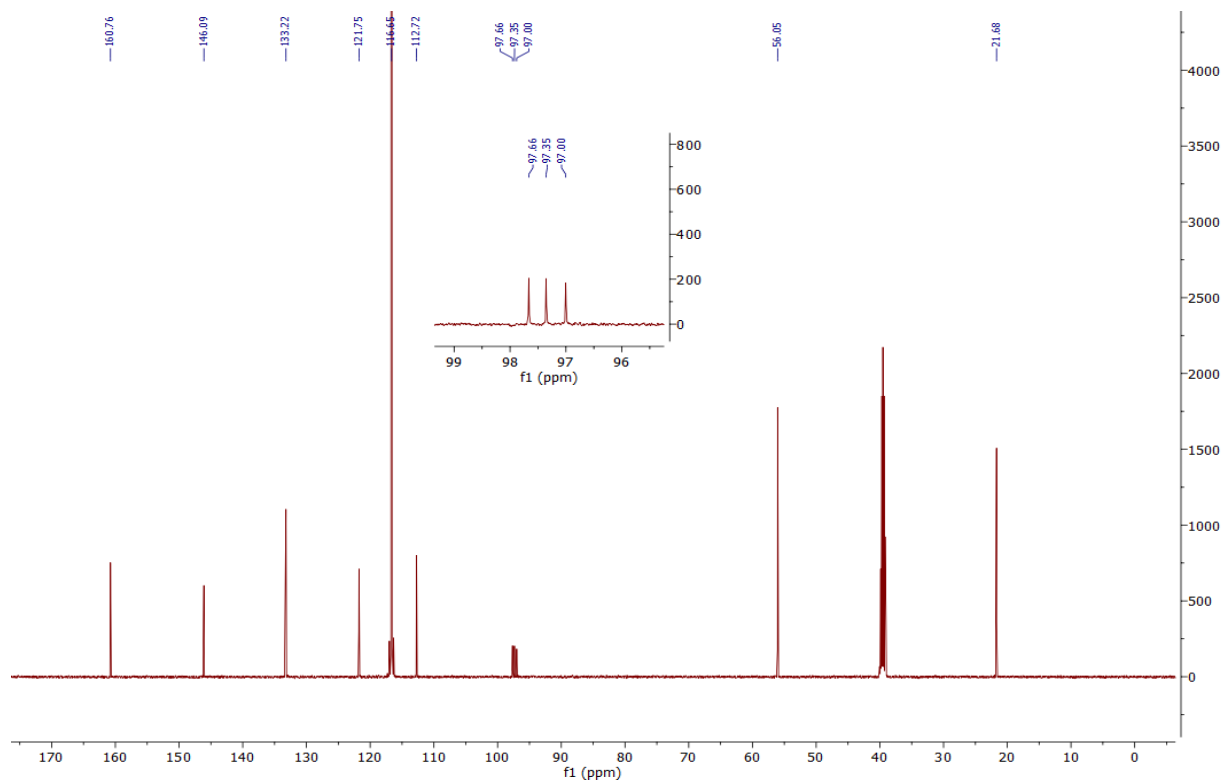

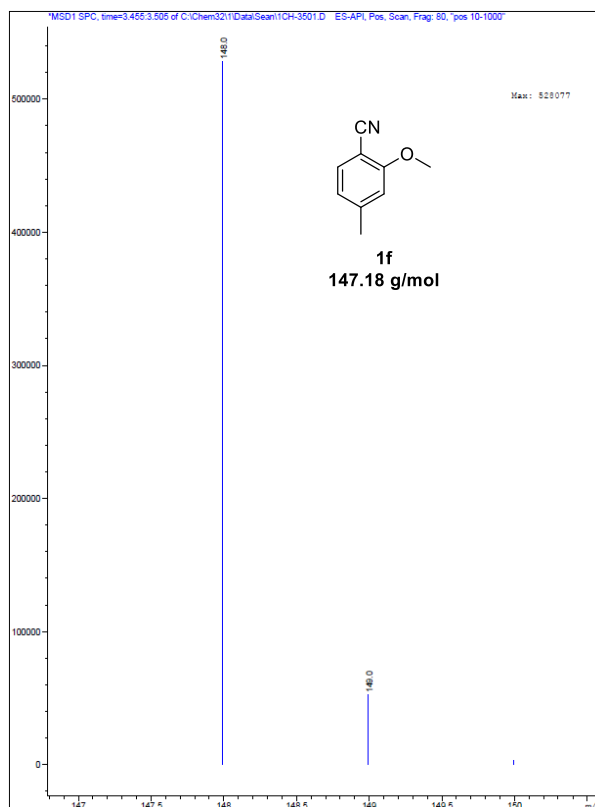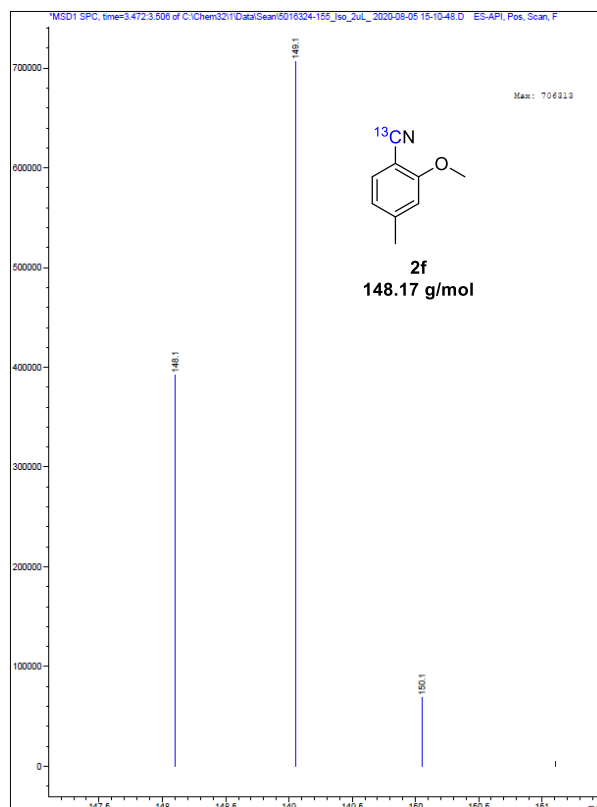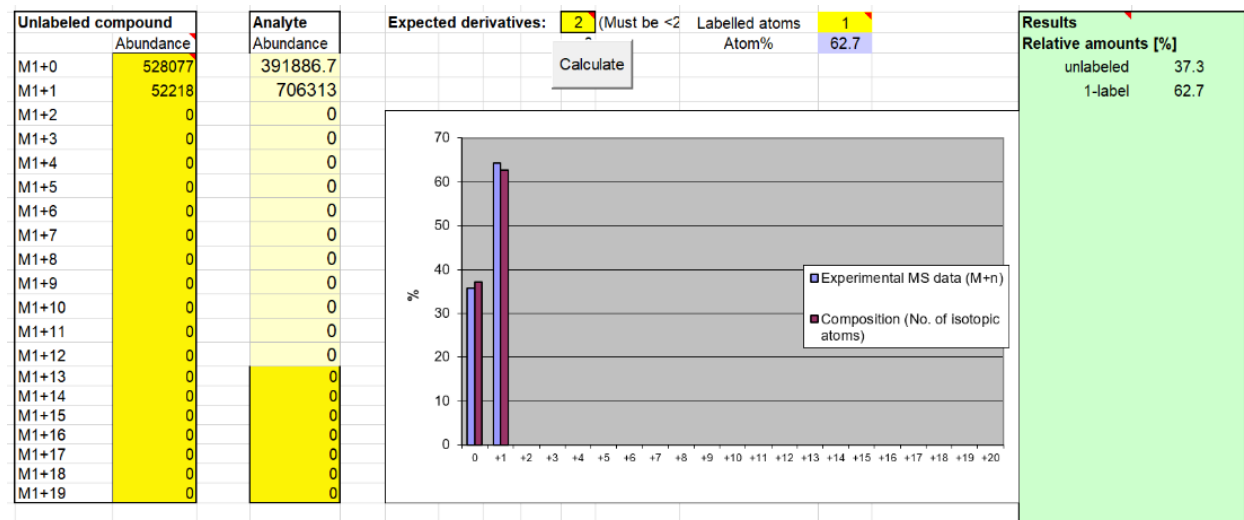

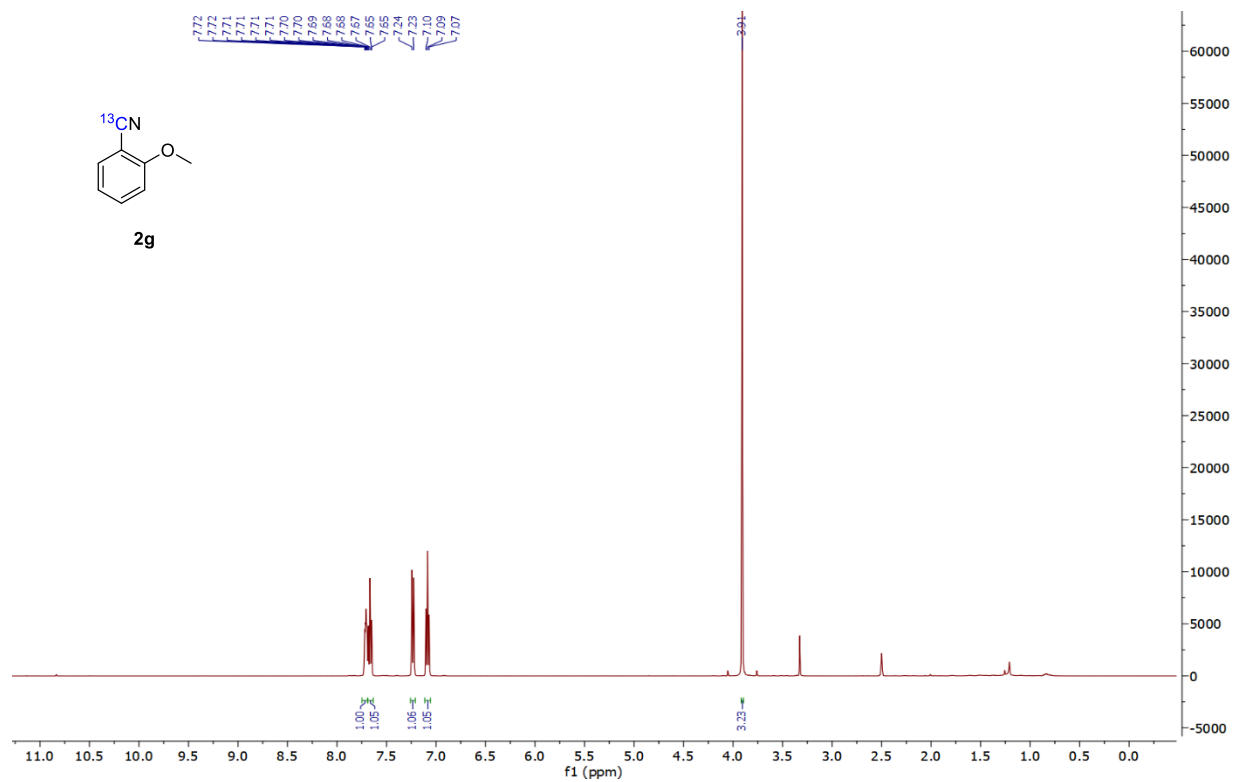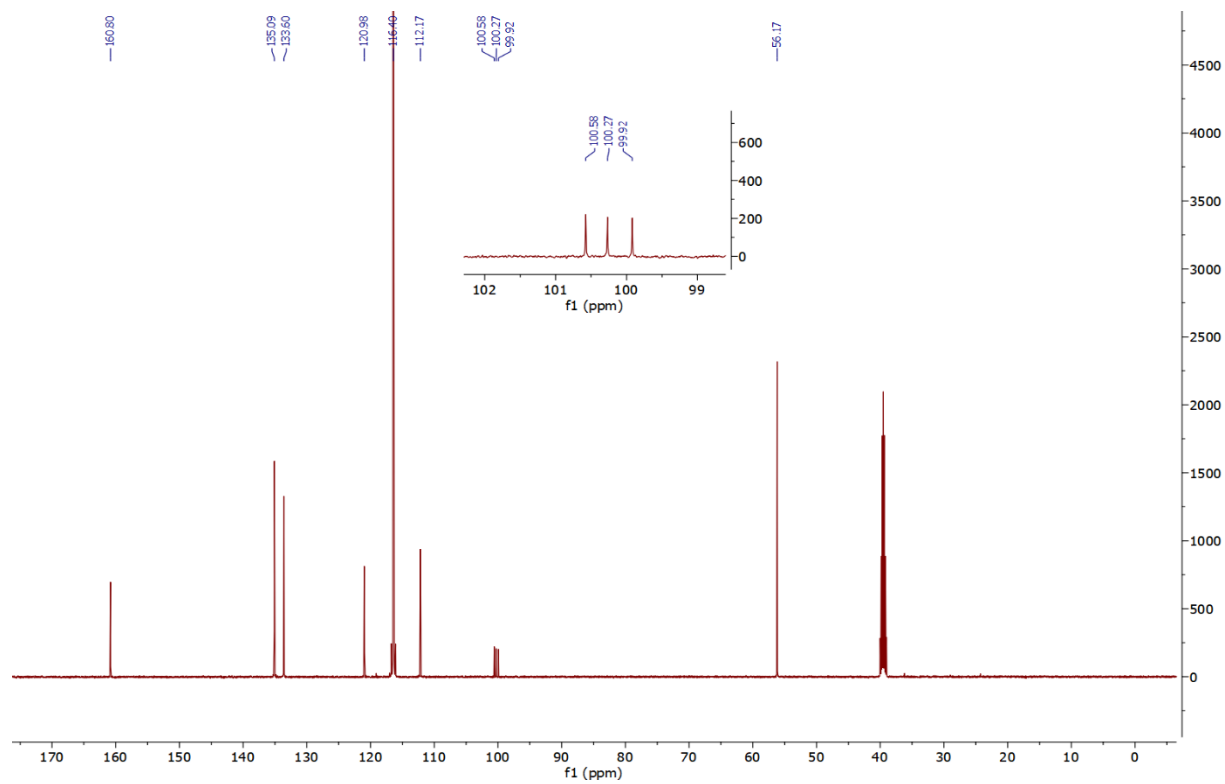

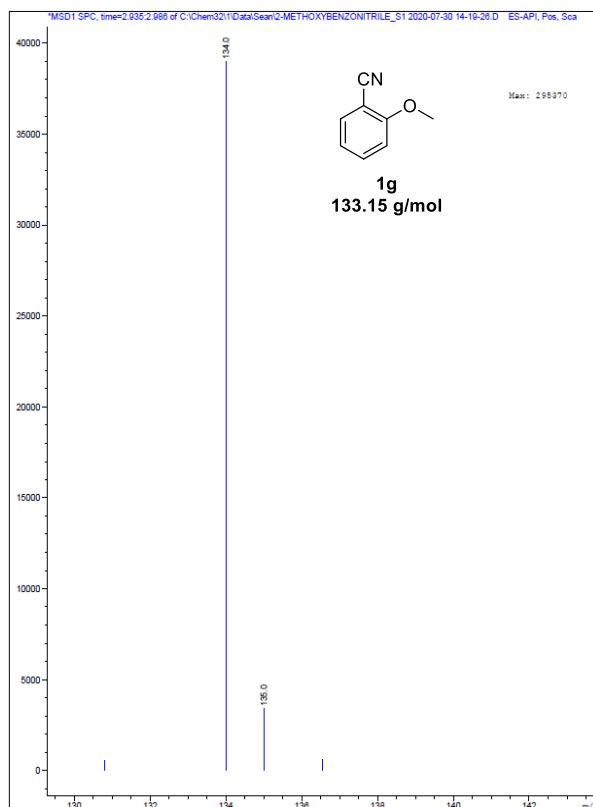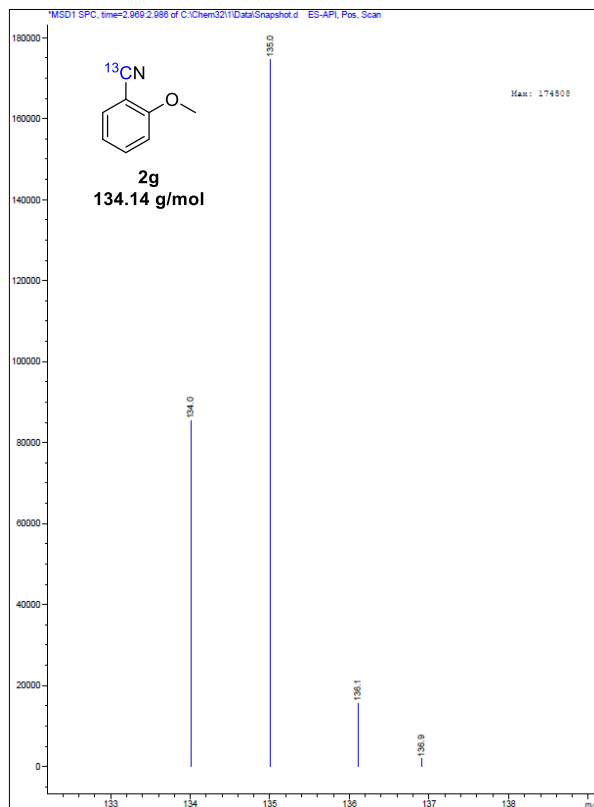

| Unlabeled compound |       | Analyte   | Expected derivatives: | 2 (Must be <2) | Labelled atoms | 1    | Results              |      |
|--------------------|-------|-----------|-----------------------|----------------|----------------|------|----------------------|------|
| Abundance          |       | Abundance |                       |                | Atom%          | 67.0 | Relative amounts [%] |      |
| M1+0               | 38982 | 85235     |                       |                |                |      | unlabeled            | 33.0 |
| M1+1               | 589   | 174508    |                       |                |                |      | 1-label              | 67.0 |
| M1+2               | 0     | 0         |                       |                |                |      |                      |      |
| M1+3               | 0     | 0         |                       |                |                |      |                      |      |
| M1+4               | 0     | 0         |                       |                |                |      |                      |      |
| M1+5               | 0     | 0         |                       |                |                |      |                      |      |
| M1+6               | 0     | 0         |                       |                |                |      |                      |      |
| M1+7               | 0     | 0         |                       |                |                |      |                      |      |
| M1+8               | 0     | 0         |                       |                |                |      |                      |      |
| M1+9               | 0     | 0         |                       |                |                |      |                      |      |
| M1+10              | 0     | 0         |                       |                |                |      |                      |      |
| M1+11              | 0     | 0         |                       |                |                |      |                      |      |
| M1+12              | 0     | 0         |                       |                |                |      |                      |      |
| M1+13              | 0     | 0         |                       |                |                |      |                      |      |
| M1+14              | 0     | 0         |                       |                |                |      |                      |      |
| M1+15              | 0     | 0         |                       |                |                |      |                      |      |
| M1+16              | 0     | 0         |                       |                |                |      |                      |      |
| M1+17              | 0     | 0         |                       |                |                |      |                      |      |
| M1+18              | 0     | 0         |                       |                |                |      |                      |      |
| M1+19              | 0     | 0         |                       |                |                |      |                      |      |

Calculate

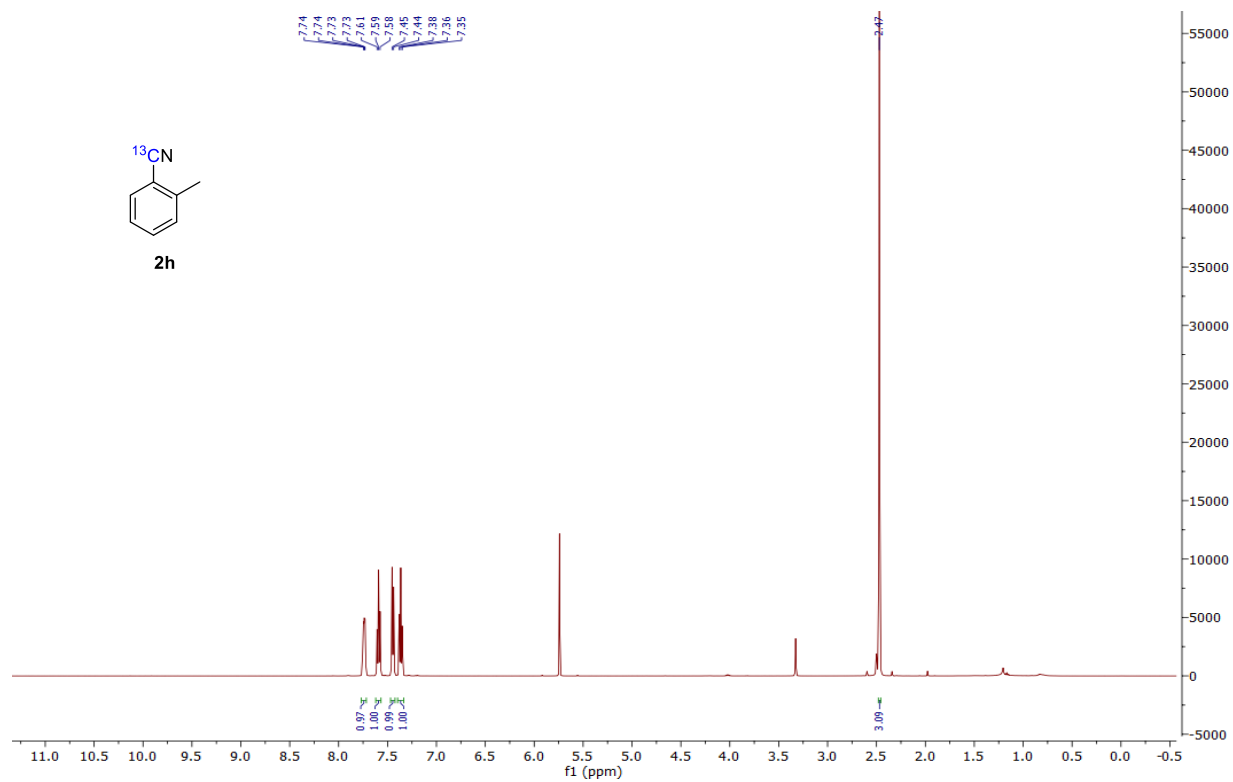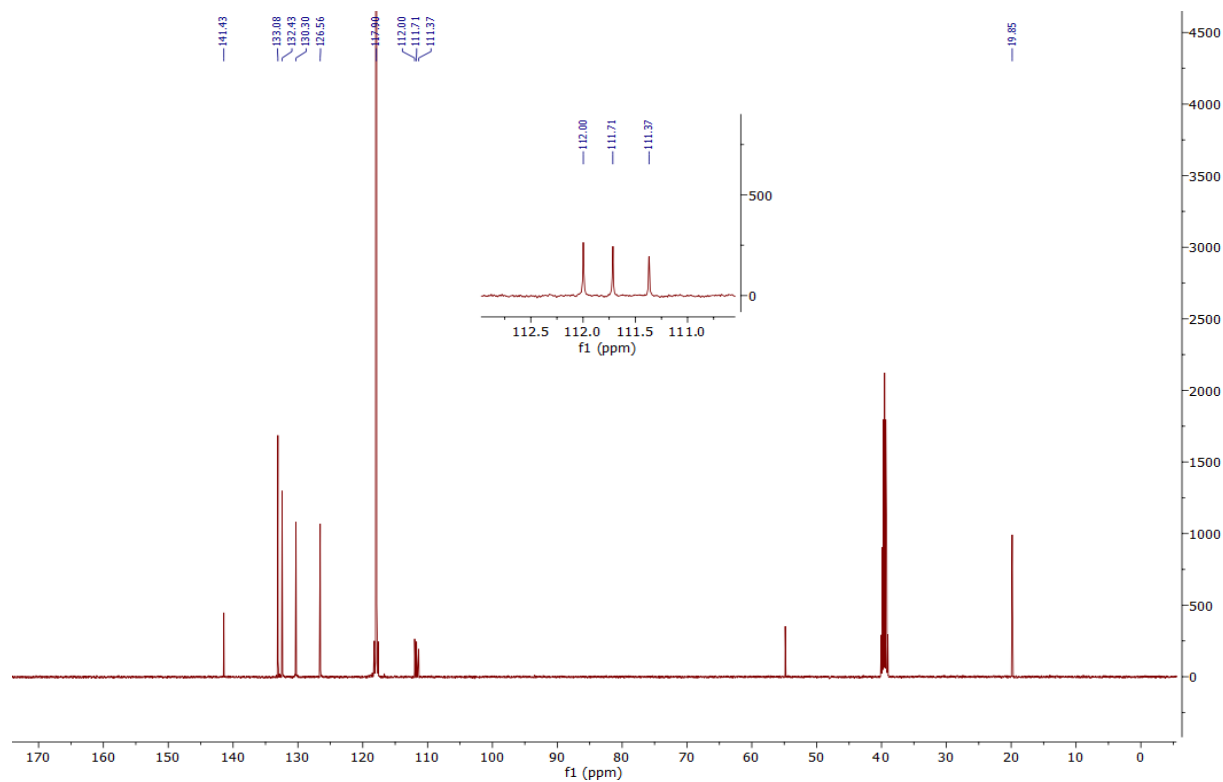

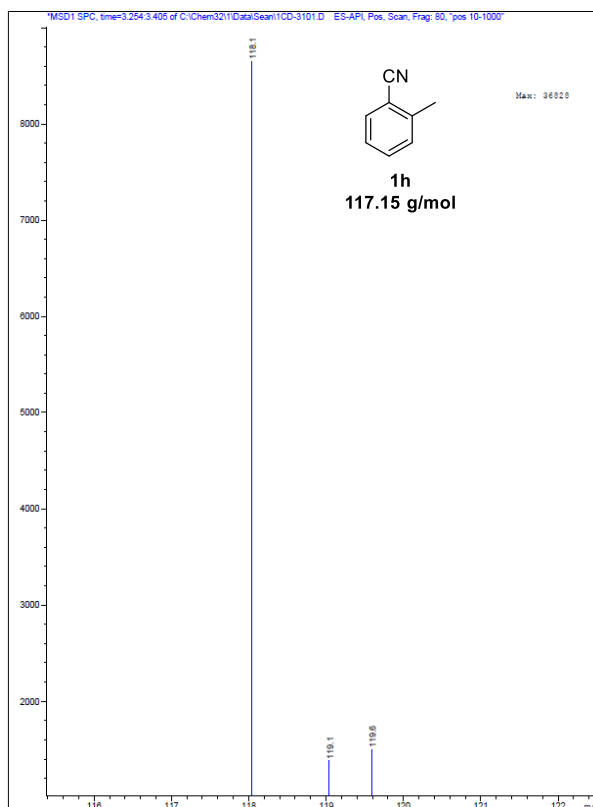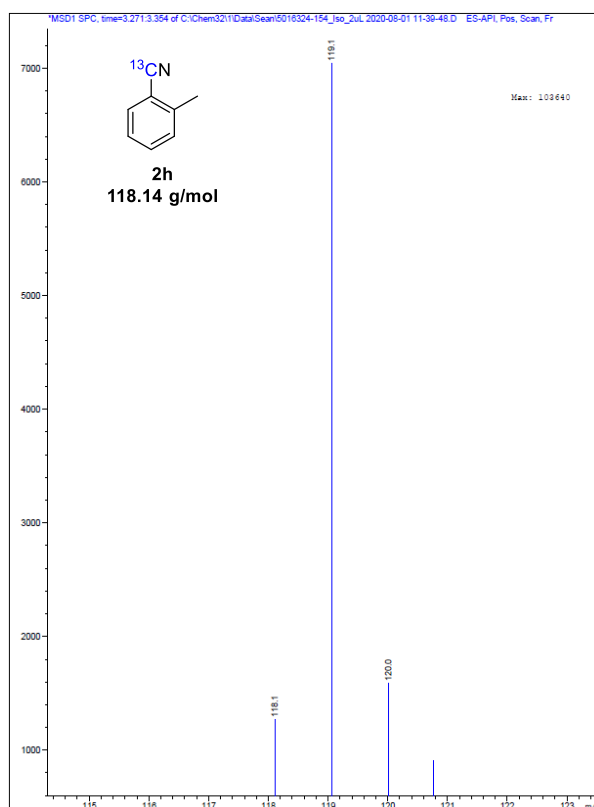

| Unlabeled compound | Abundance |
|--------------------|-----------|
| M1+0               | 8646      |
| M1+1               | 1379      |
| M1+2               | 0         |
| M1+3               | 0         |
| M1+4               | 0         |
| M1+5               | 0         |
| M1+6               | 0         |
| M1+7               | 0         |
| M1+8               | 0         |
| M1+9               | 0         |
| M1+10              | 0         |
| M1+11              | 0         |
| M1+12              | 0         |
| M1+13              | 0         |
| M1+14              | 0         |
| M1+15              | 0         |
| M1+16              | 0         |
| M1+17              | 0         |
| M1+18              | 0         |
| M1+19              | 0         |

| Analyte | Abundance |
|---------|-----------|
| M1+0    | 1268.8    |
| M1+1    | 7042      |
| M1+2    | 0         |
| M1+3    | 0         |
| M1+4    | 0         |
| M1+5    | 0         |
| M1+6    | 0         |
| M1+7    | 0         |
| M1+8    | 0         |
| M1+9    | 0         |
| M1+10   | 0         |
| M1+11   | 0         |
| M1+12   | 0         |
| M1+13   | 0         |
| M1+14   | 0         |
| M1+15   | 0         |
| M1+16   | 0         |
| M1+17   | 0         |
| M1+18   | 0         |
| M1+19   | 0         |

Expected derivatives: **2** (Must be <2)

Calculate

Labeled atoms **1**  
Atom% **83.7**

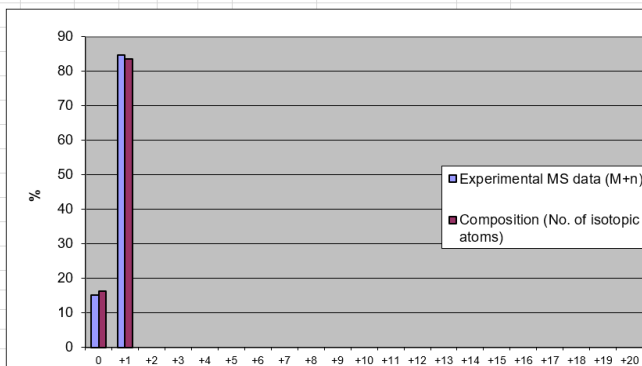

| Results   | Relative amounts [%] |
|-----------|----------------------|
| unlabeled | 16.3                 |
| 1-label   | 83.7                 |



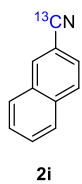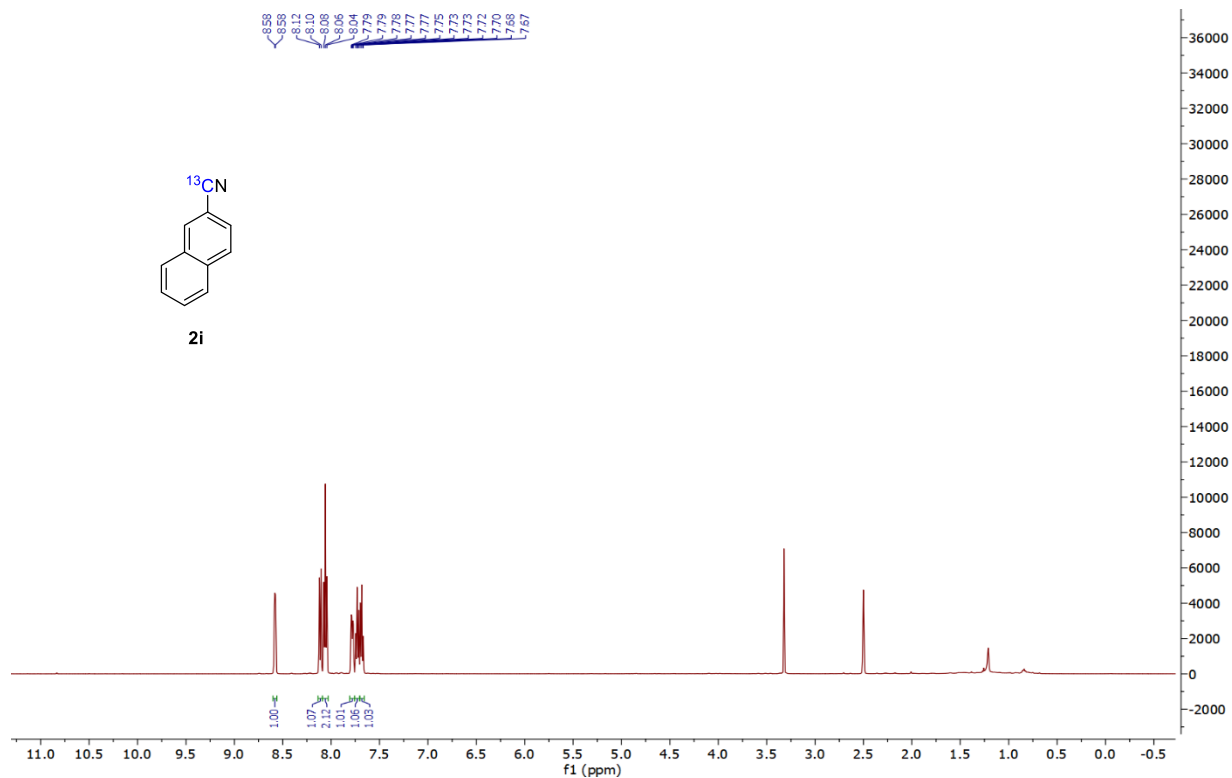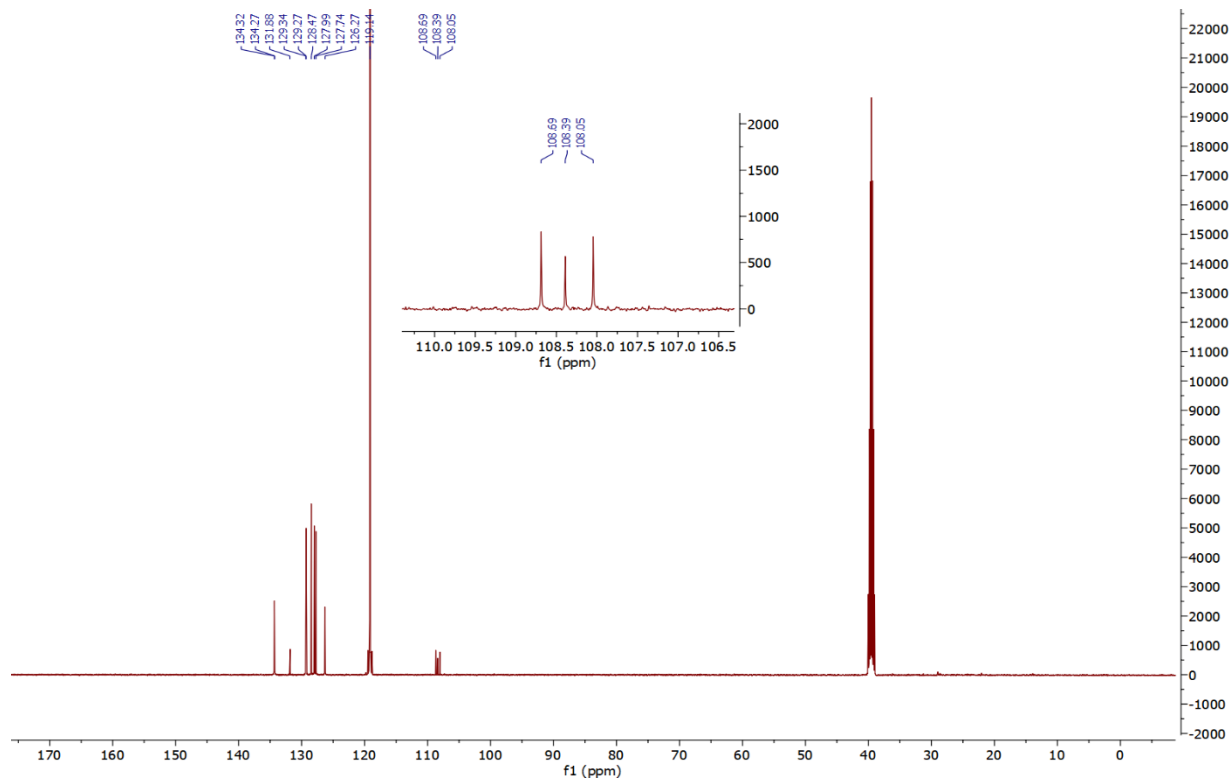

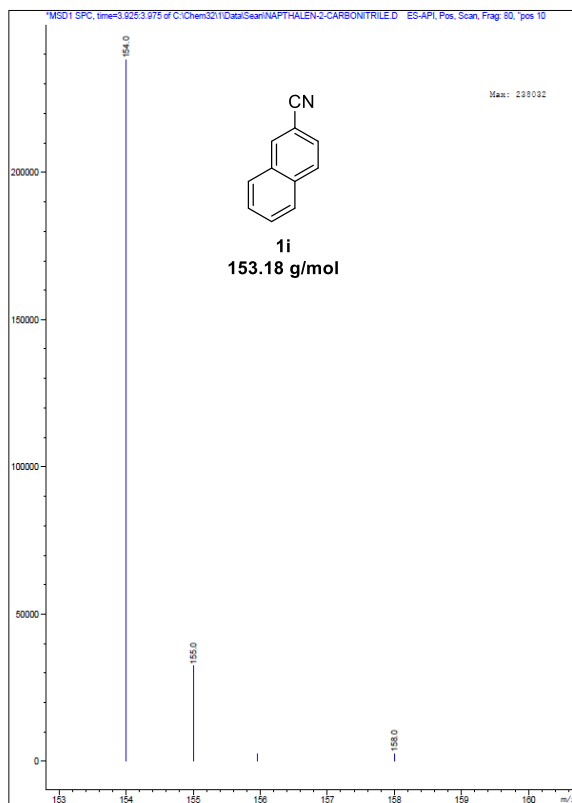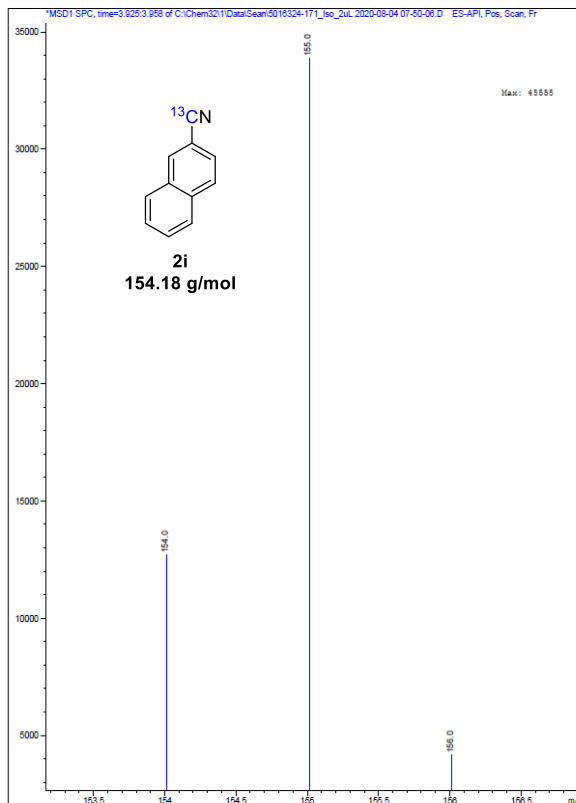

| Unlabeled compound | Abundance | Analyte | Abundance |
|--------------------|-----------|---------|-----------|
| M1+0               | 238032    |         | 12694     |
| M1+1               | 32358     |         | 33861.7   |
| M1+2               | 0         |         | 0         |
| M1+3               | 0         |         | 0         |
| M1+4               | 0         |         | 0         |
| M1+5               | 0         |         | 0         |
| M1+6               | 0         |         | 0         |
| M1+7               | 0         |         | 0         |
| M1+8               | 0         |         | 0         |
| M1+9               | 0         |         | 0         |
| M1+10              | 0         |         | 0         |
| M1+11              | 0         |         | 0         |
| M1+12              | 0         |         | 0         |
| M1+13              | 0         |         | 0         |
| M1+14              | 0         |         | 0         |
| M1+15              | 0         |         | 0         |
| M1+16              | 0         |         | 0         |
| M1+17              | 0         |         | 0         |
| M1+18              | 0         |         | 0         |
| M1+19              | 0         |         | 0         |

Expected derivatives: **2** (Must be <2)

Calculate

Labelled atoms **1**  
Atom% **71.2**

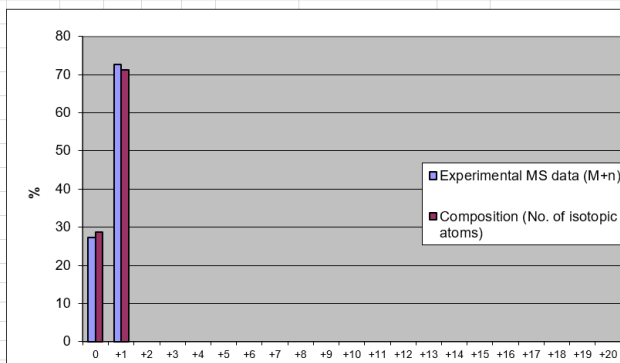

**Results**  
**Relative amounts [%]**  
unlabeled 28.8  
1-label 71.2

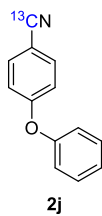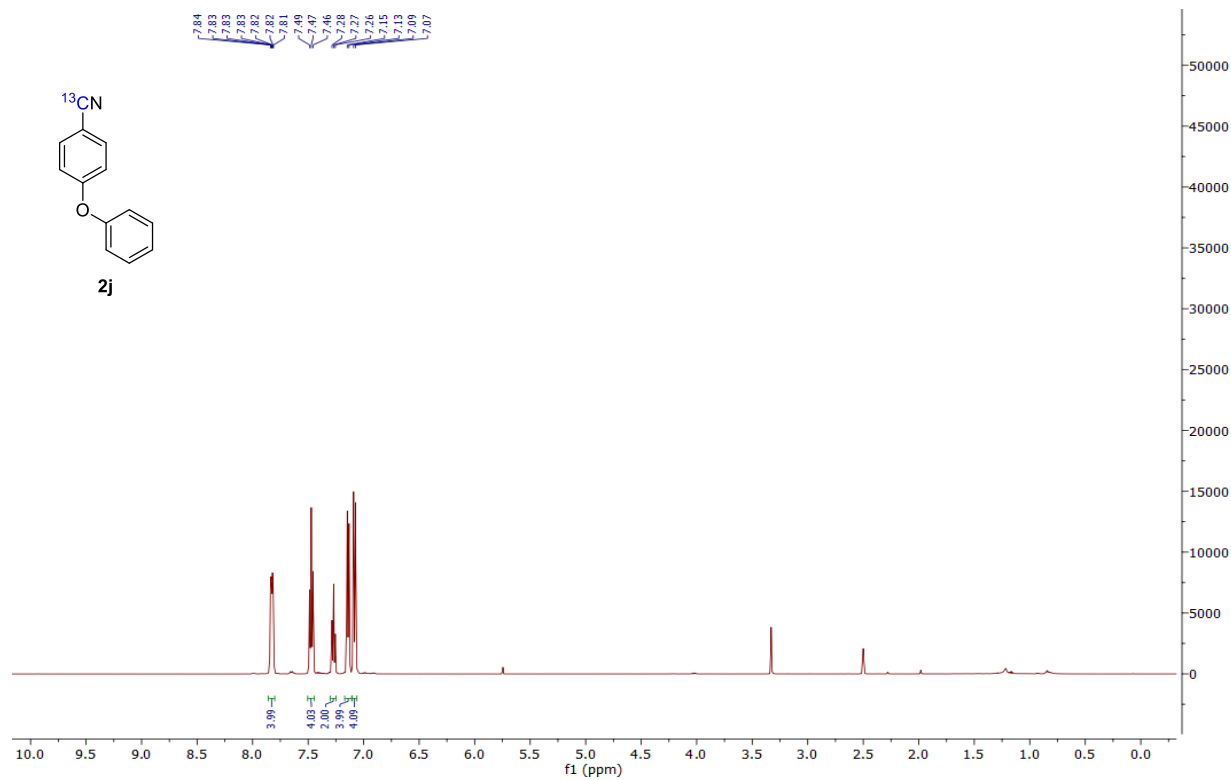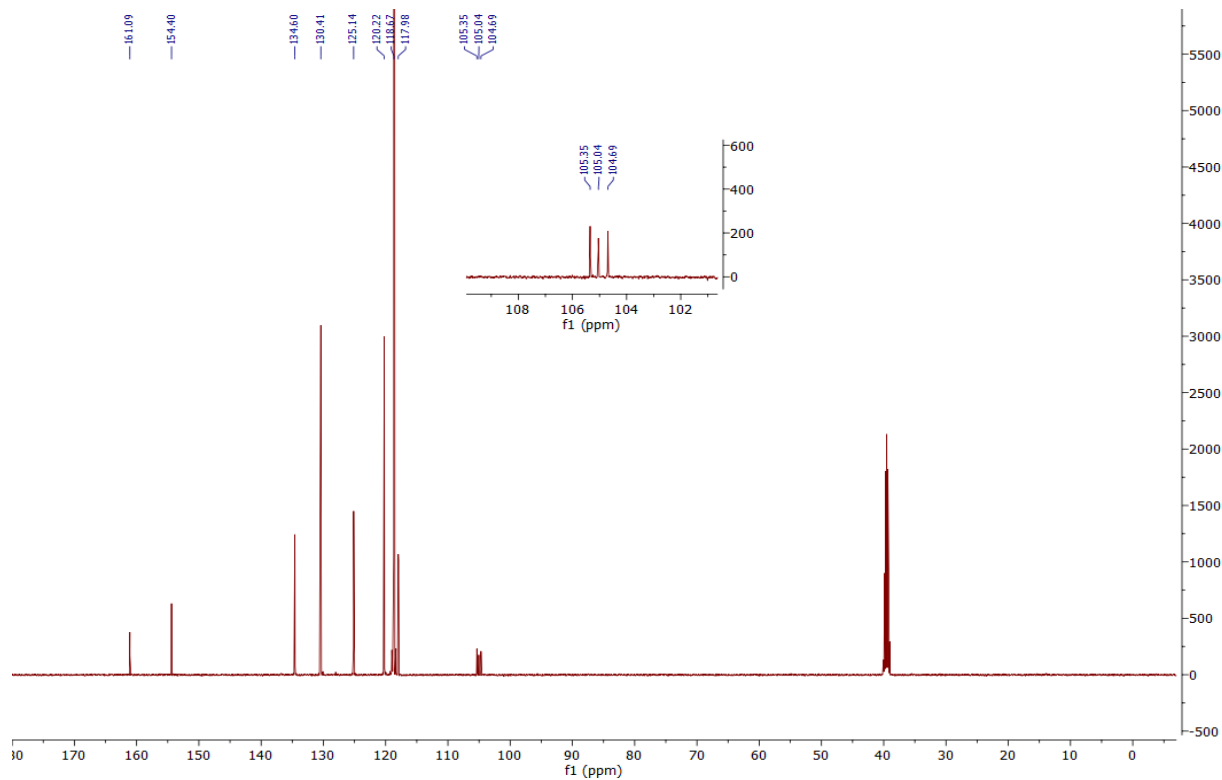

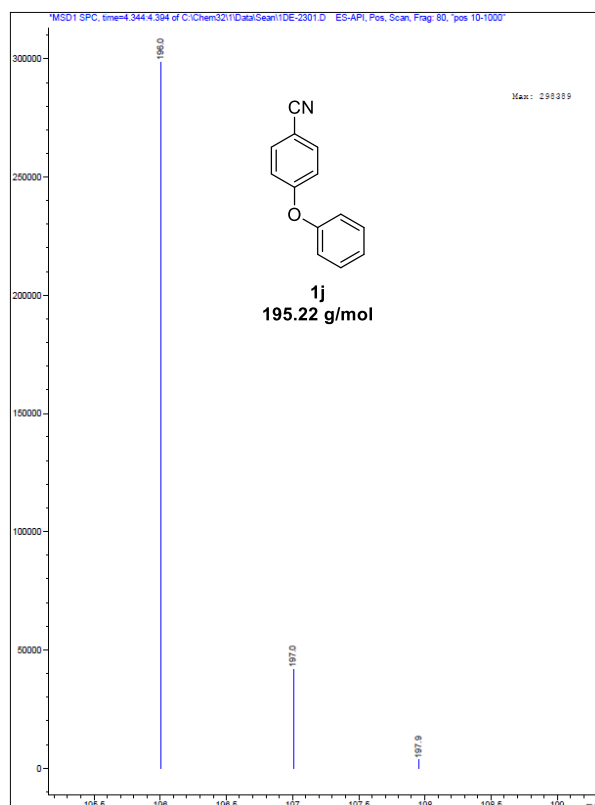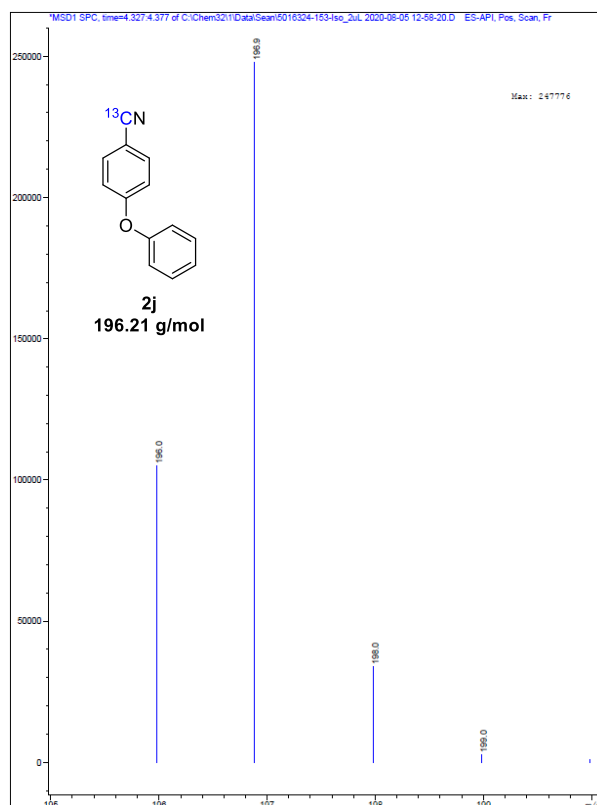

| Unlabeled compound | Abundance | Analyte | Abundance |
|--------------------|-----------|---------|-----------|
| M1+0               | 3602192   |         | 86788.7   |
| M1+1               | 398624    |         | 202761.7  |
| M1+2               | 0         |         | 0         |
| M1+3               | 0         |         | 0         |
| M1+4               | 0         |         | 0         |
| M1+5               | 0         |         | 0         |
| M1+6               | 0         |         | 0         |
| M1+7               | 0         |         | 0         |
| M1+8               | 0         |         | 0         |
| M1+9               | 0         |         | 0         |
| M1+10              | 0         |         | 0         |
| M1+11              | 0         |         | 0         |
| M1+12              | 0         |         | 0         |
| M1+13              | 0         |         | 0         |
| M1+14              | 0         |         | 0         |
| M1+15              | 0         |         | 0         |
| M1+16              | 0         |         | 0         |
| M1+17              | 0         |         | 0         |
| M1+18              | 0         |         | 0         |
| M1+19              | 0         |         | 0         |

Expected derivatives: **2** (Must be <2)

Labelled atoms: **1**

Atom%: **68.7**

Calculate

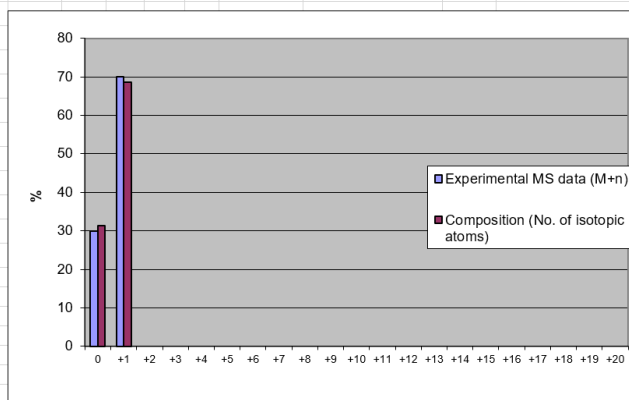

| Results              |      |
|----------------------|------|
| Relative amounts [%] |      |
| unlabeled            | 31.3 |
| 1-label              | 68.7 |

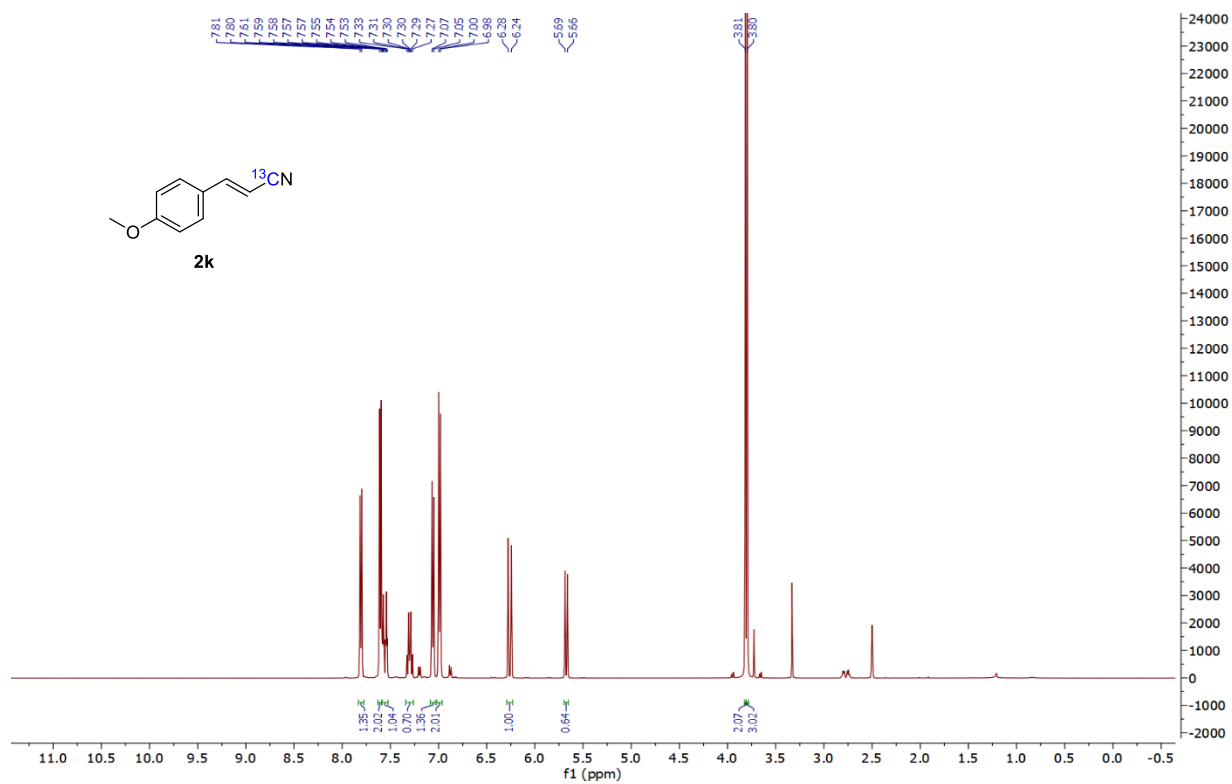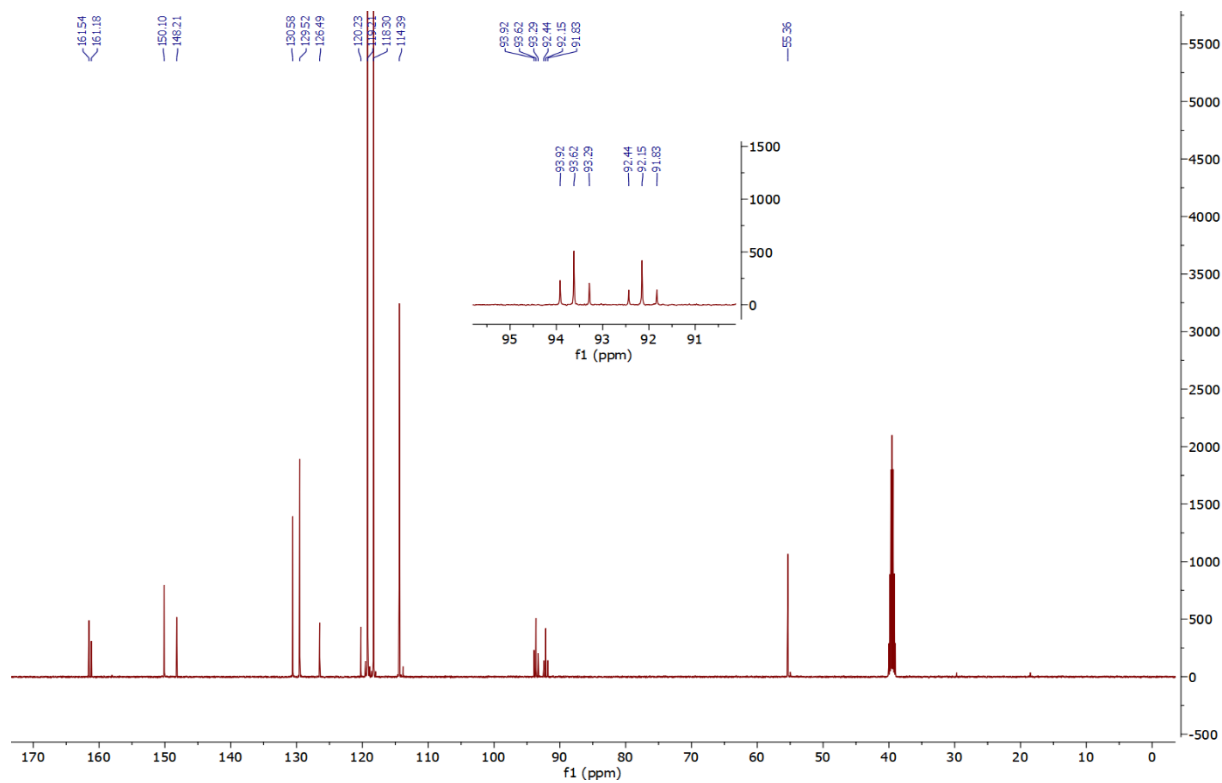

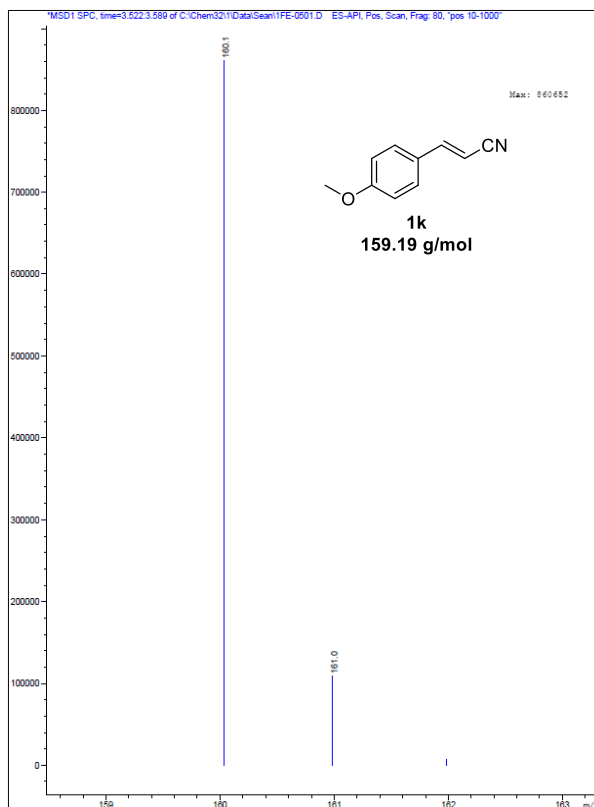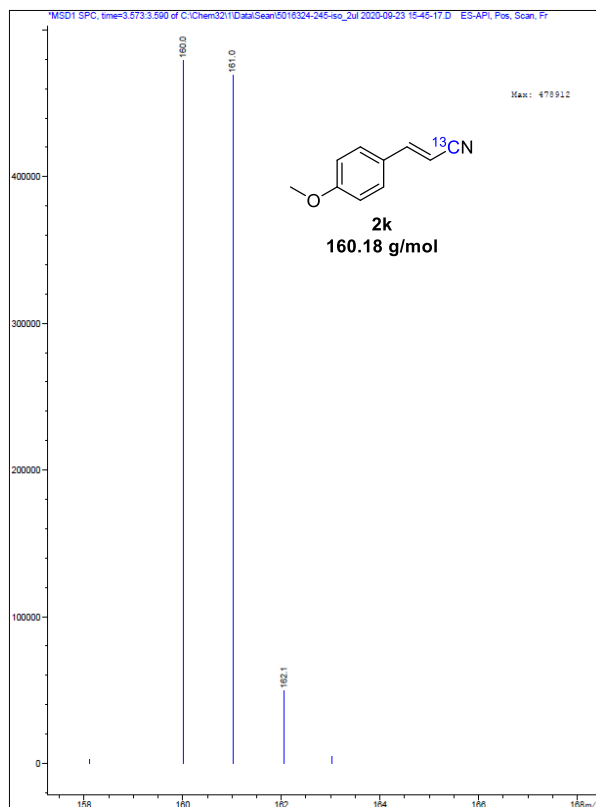

| Unlabeled compound | Abundance |
|--------------------|-----------|
| M1+0               | 860652    |
| M1+1               | 109562    |
| M1+2               | 0         |
| M1+3               | 0         |
| M1+4               | 0         |
| M1+5               | 0         |
| M1+6               | 0         |
| M1+7               | 0         |
| M1+8               | 0         |
| M1+9               | 0         |
| M1+10              | 0         |
| M1+11              | 0         |
| M1+12              | 0         |
| M1+13              | 0         |
| M1+14              | 0         |
| M1+15              | 0         |
| M1+16              | 0         |
| M1+17              | 0         |
| M1+18              | 0         |
| M1+19              | 0         |

| Analyte | Abundance |
|---------|-----------|
| M1+0    | 478912    |
| M1+1    | 469376    |
| M1+2    | 0         |
| M1+3    | 0         |
| M1+4    | 0         |
| M1+5    | 0         |
| M1+6    | 0         |
| M1+7    | 0         |
| M1+8    | 0         |
| M1+9    | 0         |
| M1+10   | 0         |
| M1+11   | 0         |
| M1+12   | 0         |
| M1+13   | 0         |
| M1+14   | 0         |
| M1+15   | 0         |
| M1+16   | 0         |
| M1+17   | 0         |
| M1+18   | 0         |
| M1+19   | 0         |

Expected derivatives: **2** (Must be <2)

Calculate

Labelled atoms **1**

Atom% **45.6**

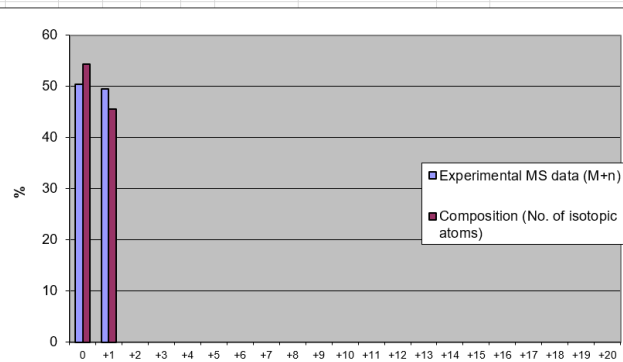

Results

Relative amounts [%]

|           |      |
|-----------|------|
| unlabeled | 54.4 |
| 1-label   | 45.6 |

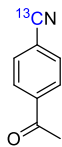

21

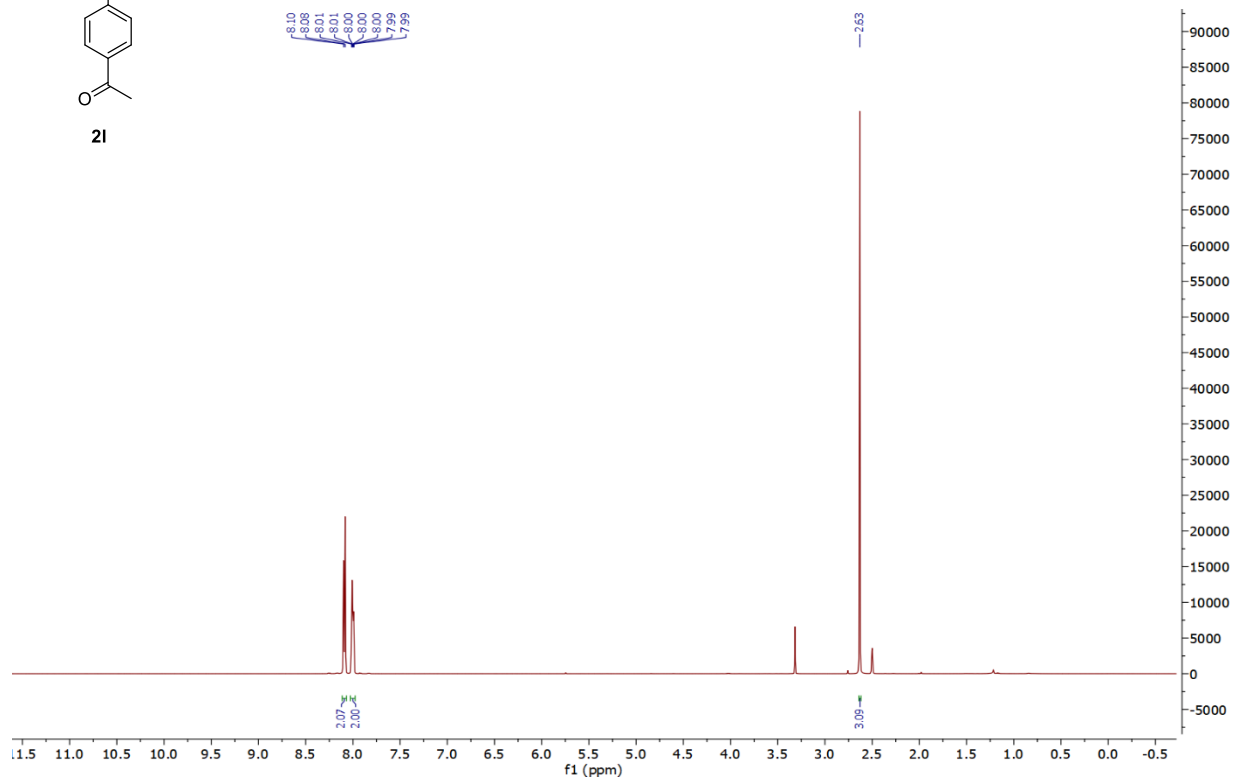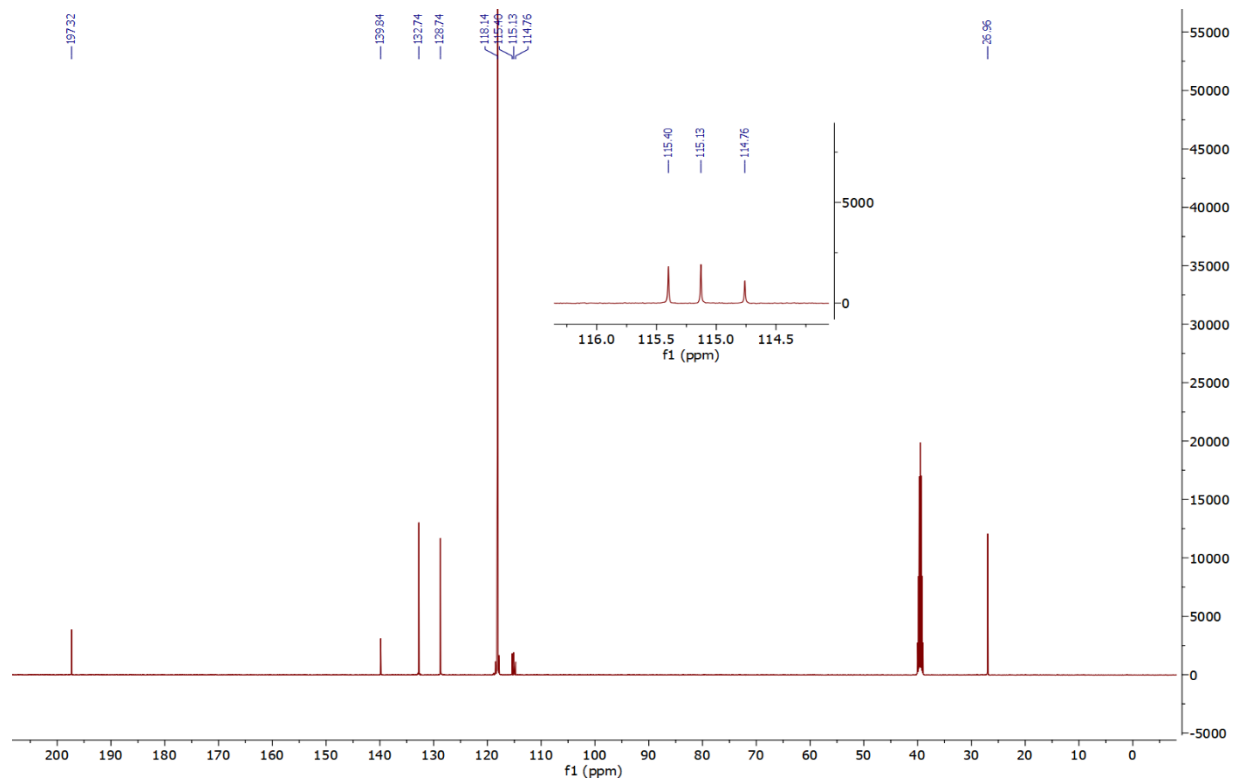

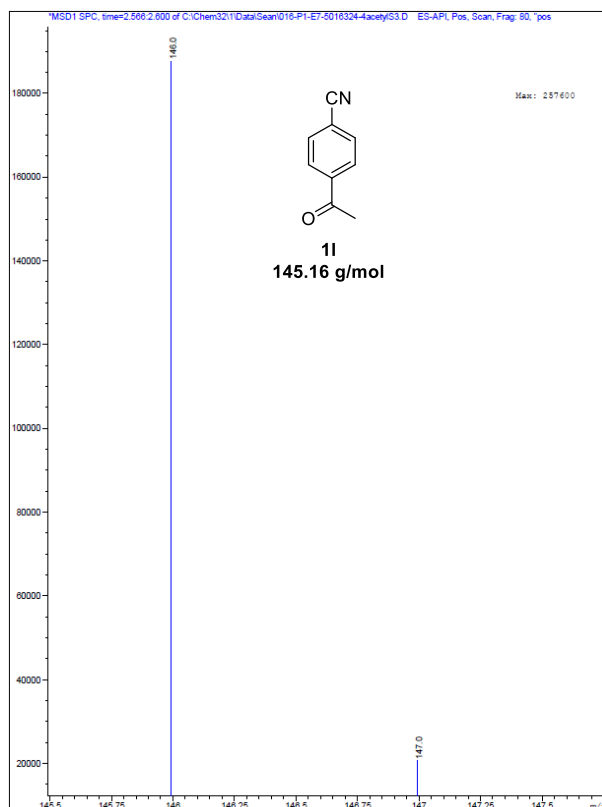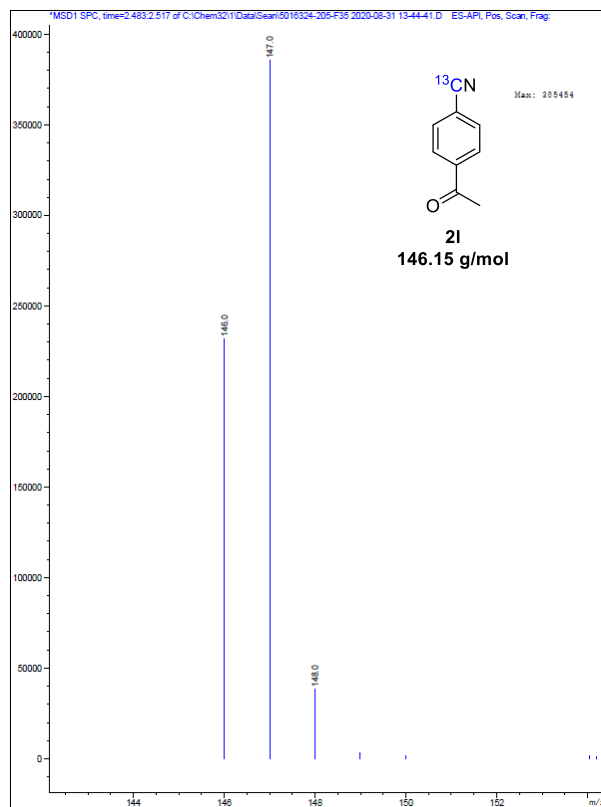

| Unlabeled compound | Abundance | Analyte | Abundance |
|--------------------|-----------|---------|-----------|
| M1+0               | 158312    | M1+0    | 231772.7  |
| M1+1               | 18035     | M1+1    | 385454    |
| M1+2               | 0         | M1+2    | 0         |
| M1+3               | 0         | M1+3    | 0         |
| M1+4               | 0         | M1+4    | 0         |
| M1+5               | 0         | M1+5    | 0         |
| M1+6               | 0         | M1+6    | 0         |
| M1+7               | 0         | M1+7    | 0         |
| M1+8               | 0         | M1+8    | 0         |
| M1+9               | 0         | M1+9    | 0         |
| M1+10              | 0         | M1+10   | 0         |
| M1+11              | 0         | M1+11   | 0         |
| M1+12              | 0         | M1+12   | 0         |
| M1+13              | 0         | M1+13   | 0         |
| M1+14              | 0         | M1+14   | 0         |
| M1+15              | 0         | M1+15   | 0         |
| M1+16              | 0         | M1+16   | 0         |
| M1+17              | 0         | M1+17   | 0         |
| M1+18              | 0         | M1+18   | 0         |
| M1+19              | 0         | M1+19   | 0         |

Expected derivatives: **2** (Must be <2) Labeled atoms **1**

Atom% **60.4**

Calculate

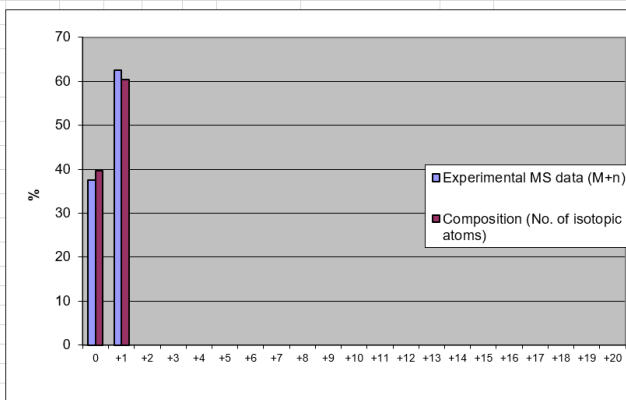

| Results              |      |
|----------------------|------|
| Relative amounts [%] |      |
| unlabeled            | 39.6 |
| 1-label              | 60.4 |



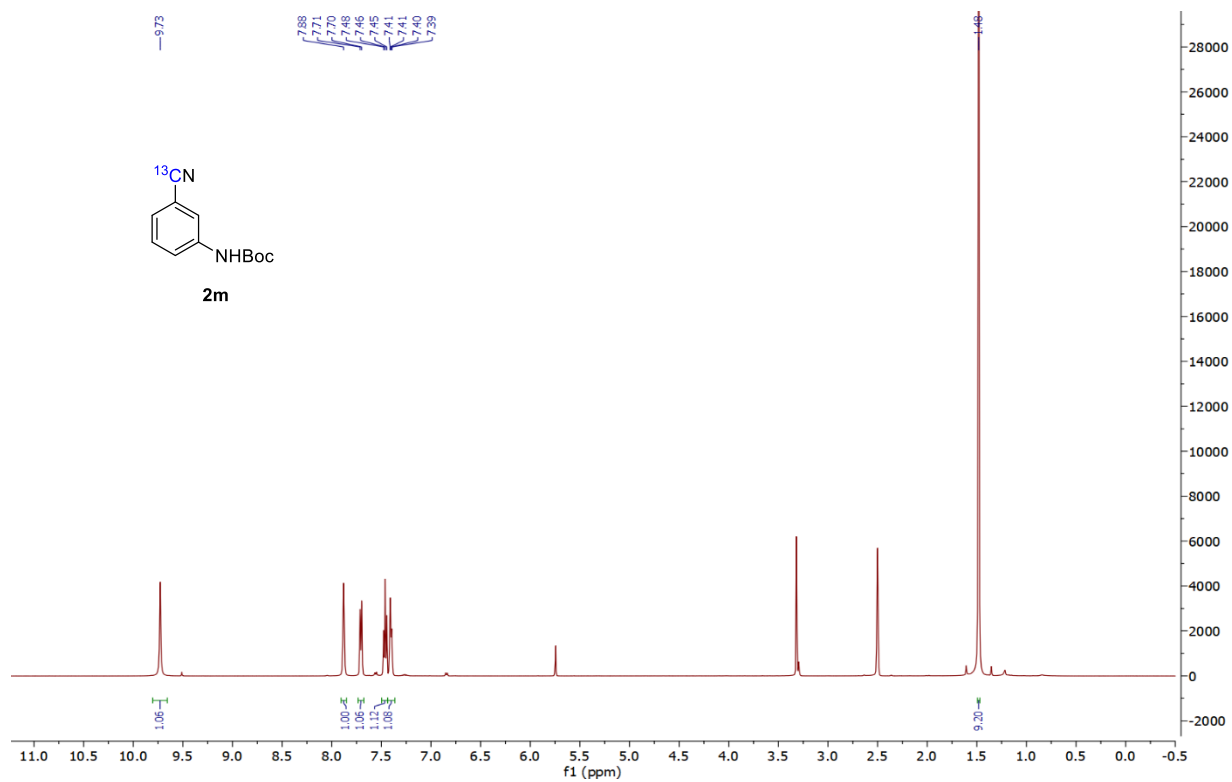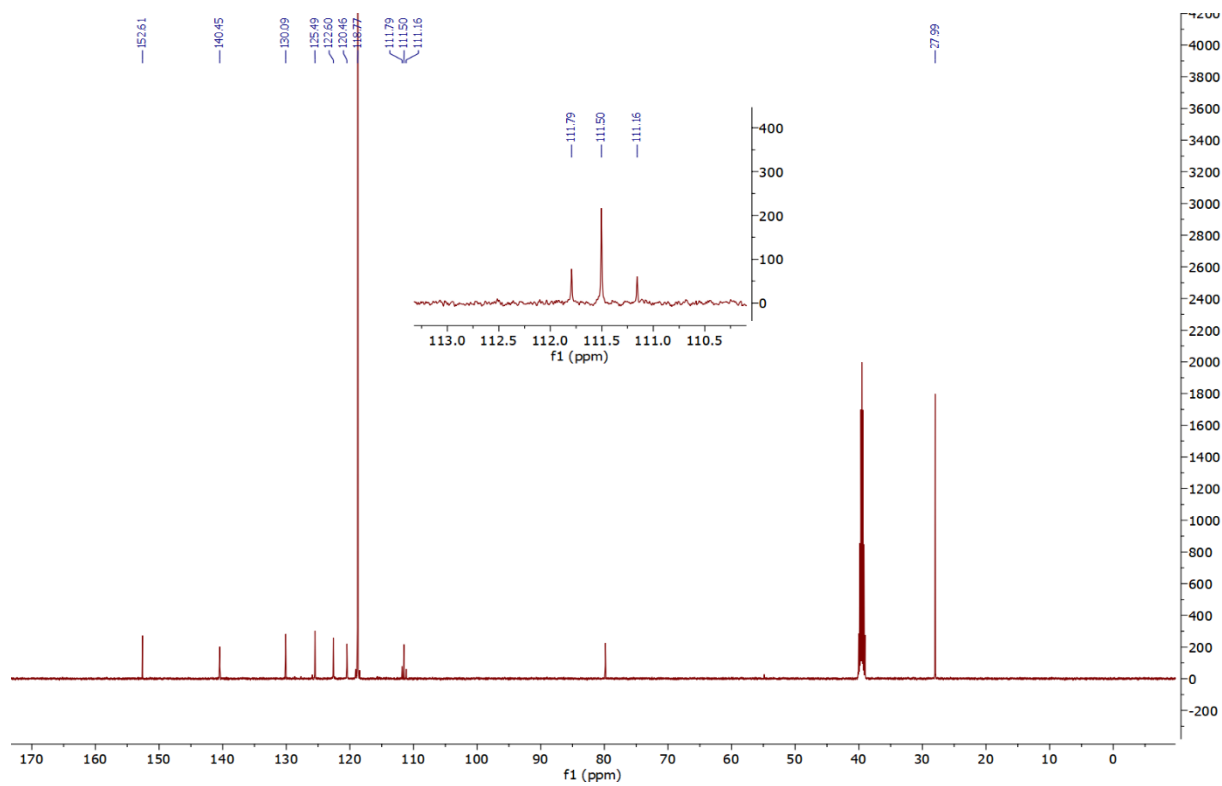

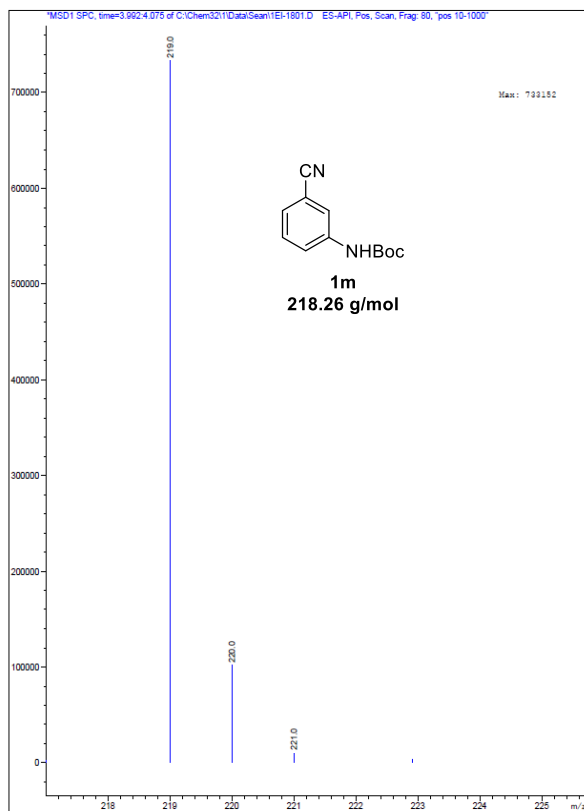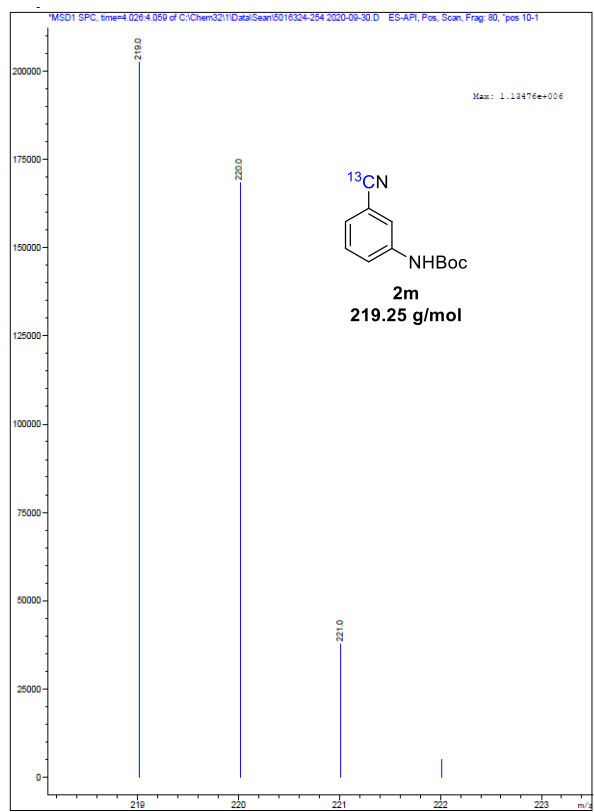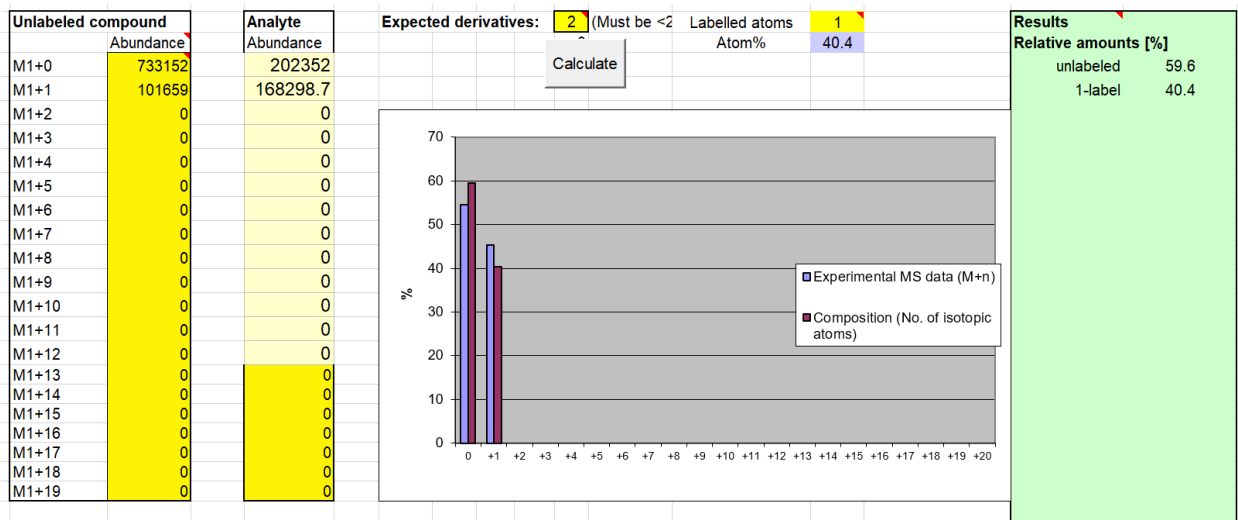

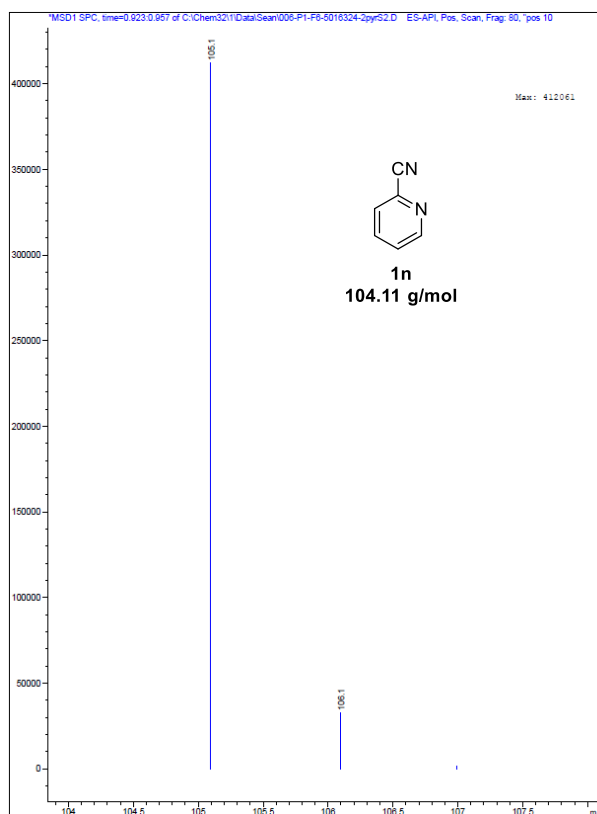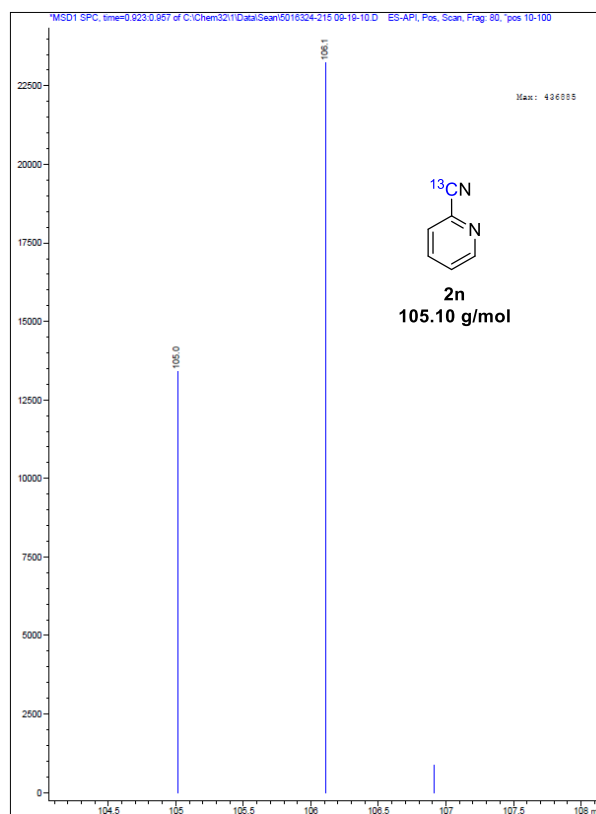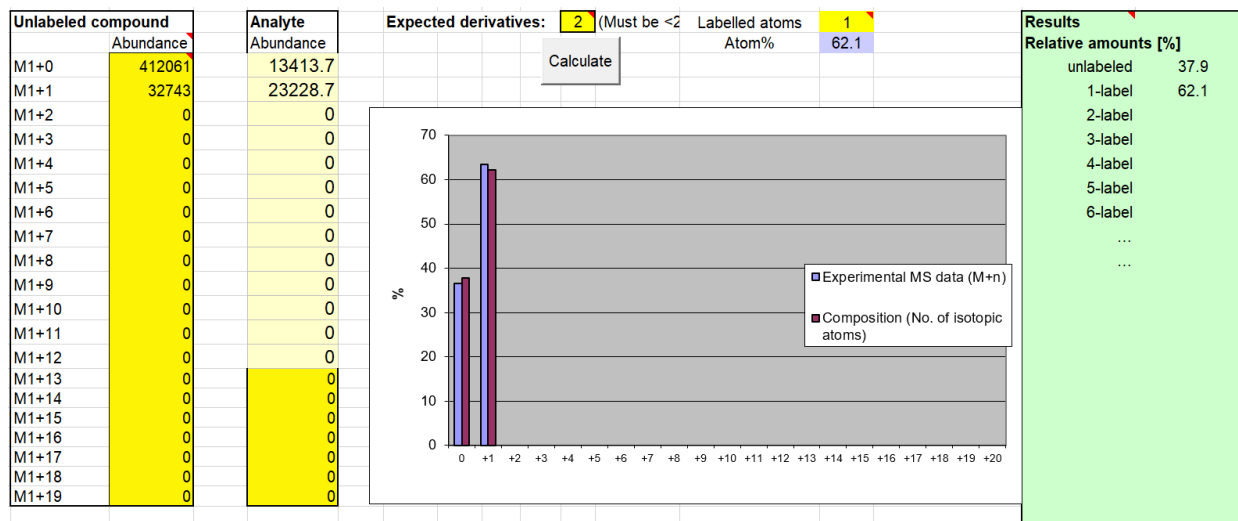

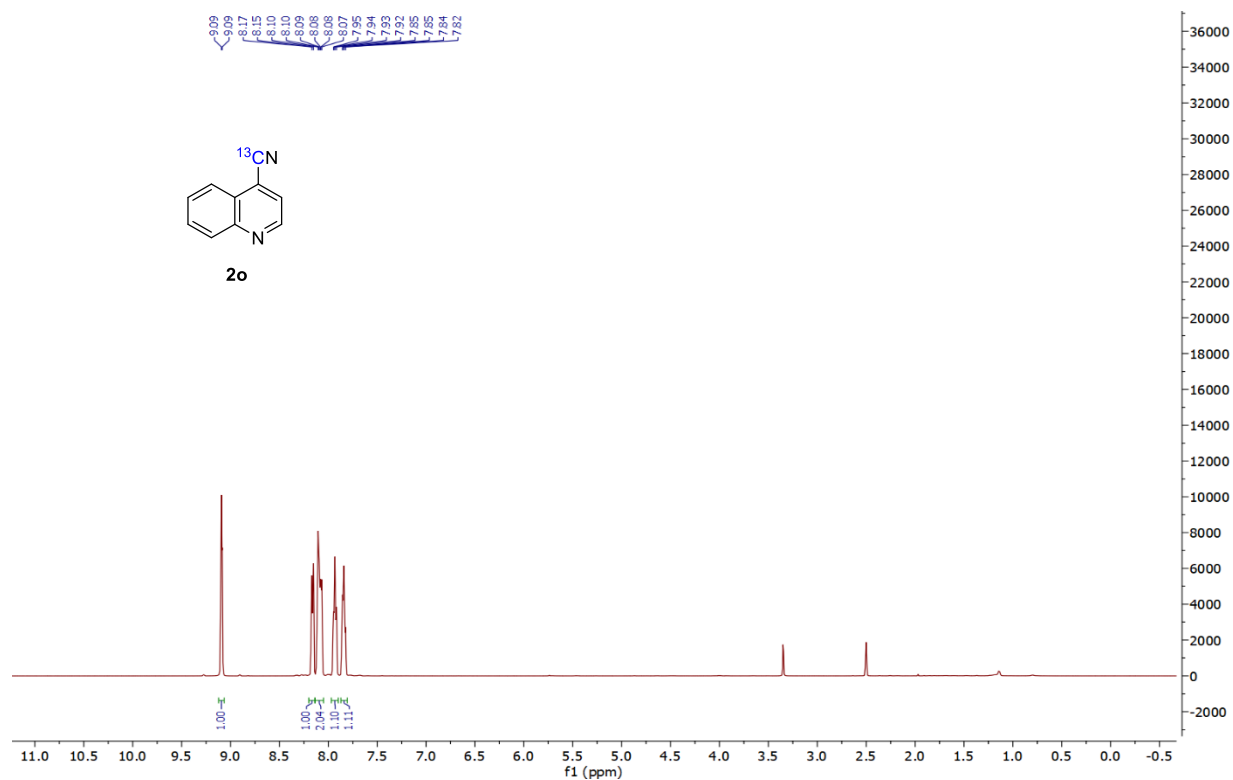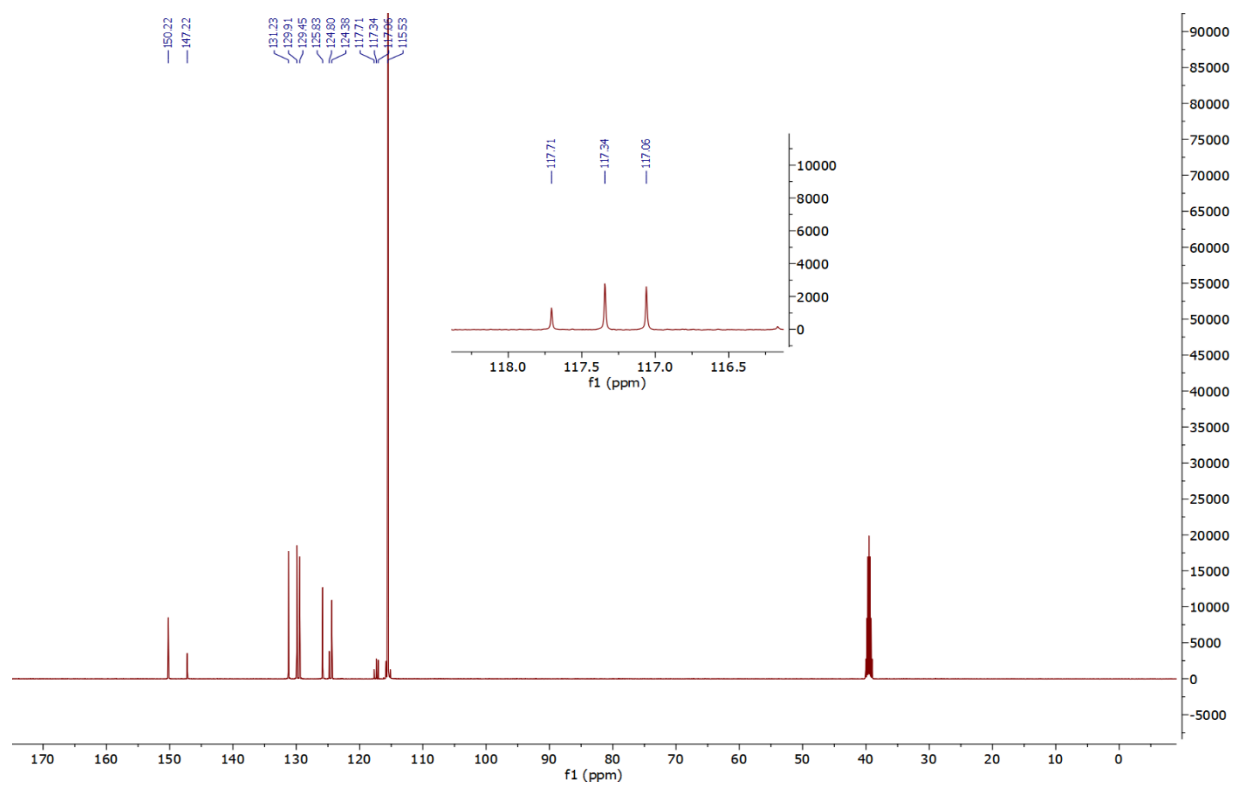

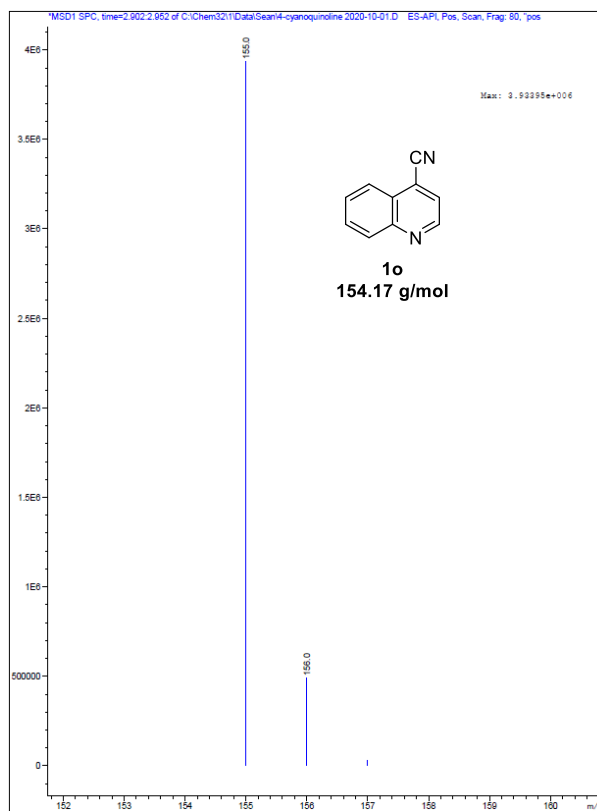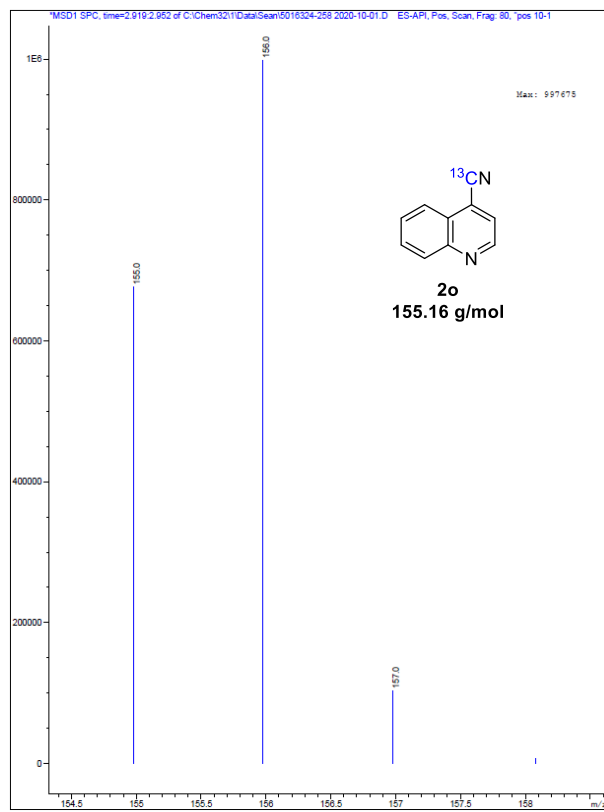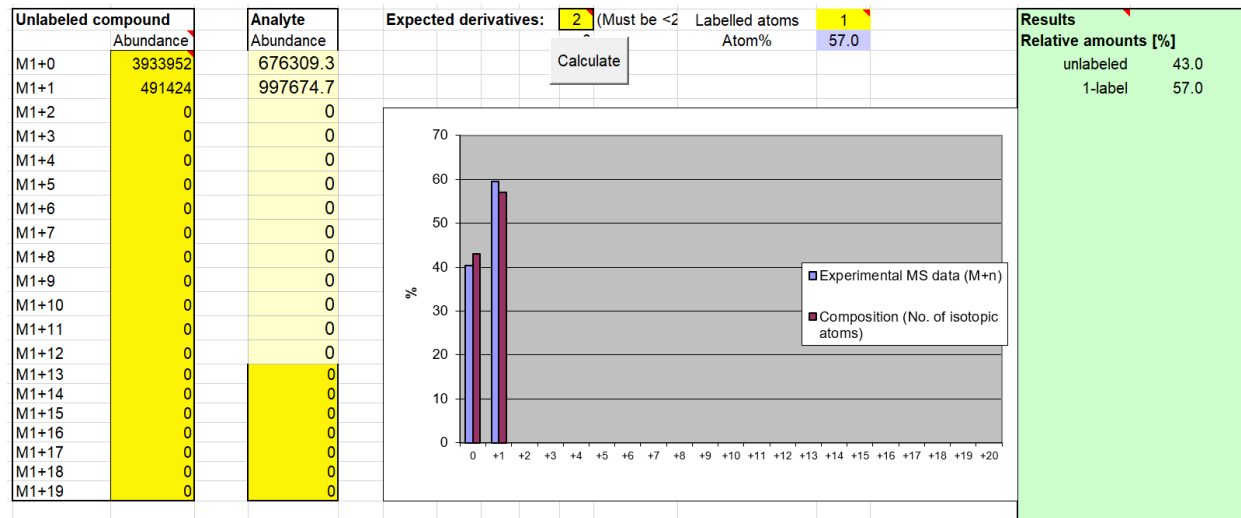

**Results**

Relative amounts [%]

|           |      |
|-----------|------|
| unlabeled | 43.0 |
| 1-label   | 57.0 |

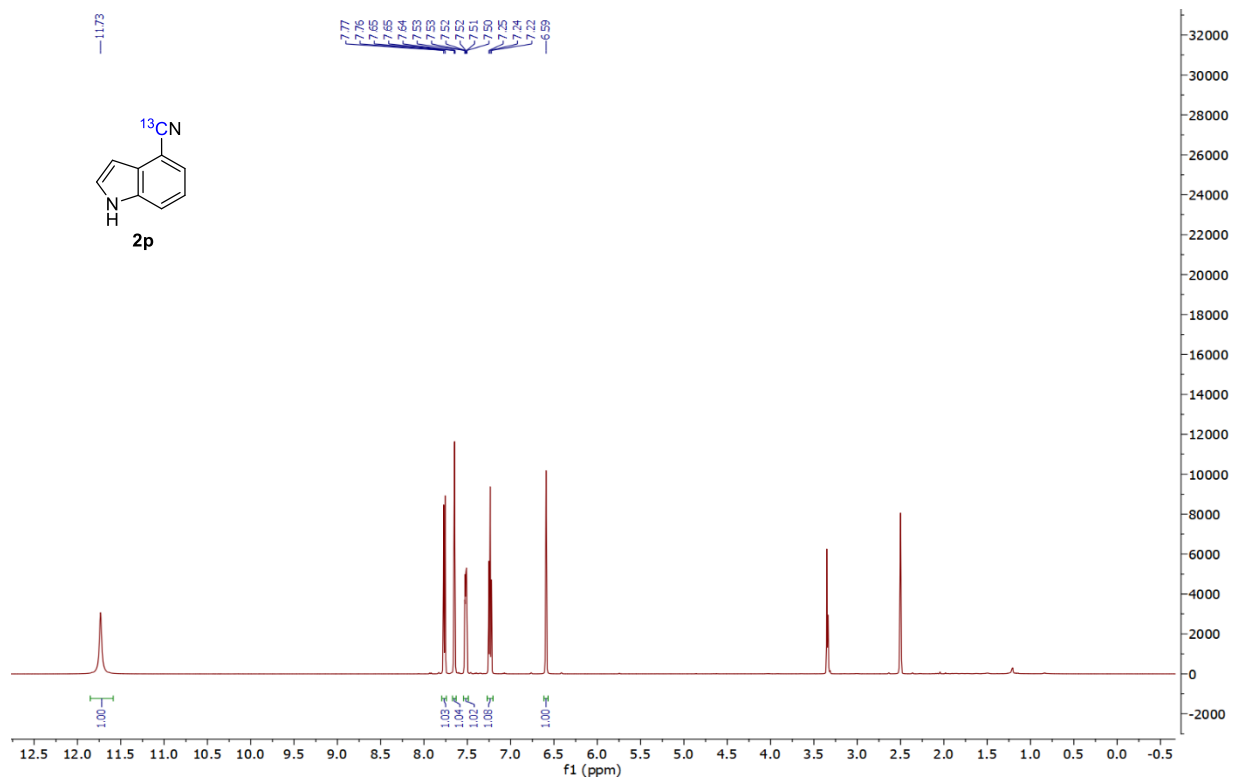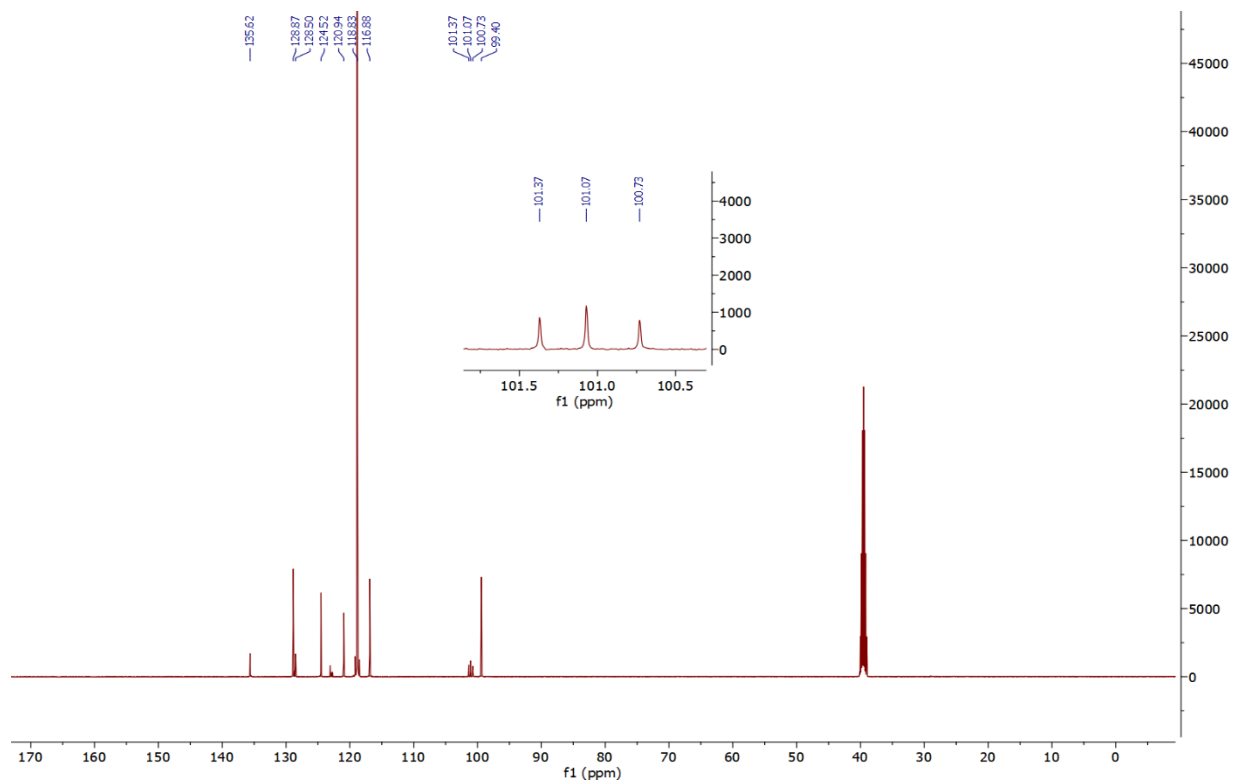

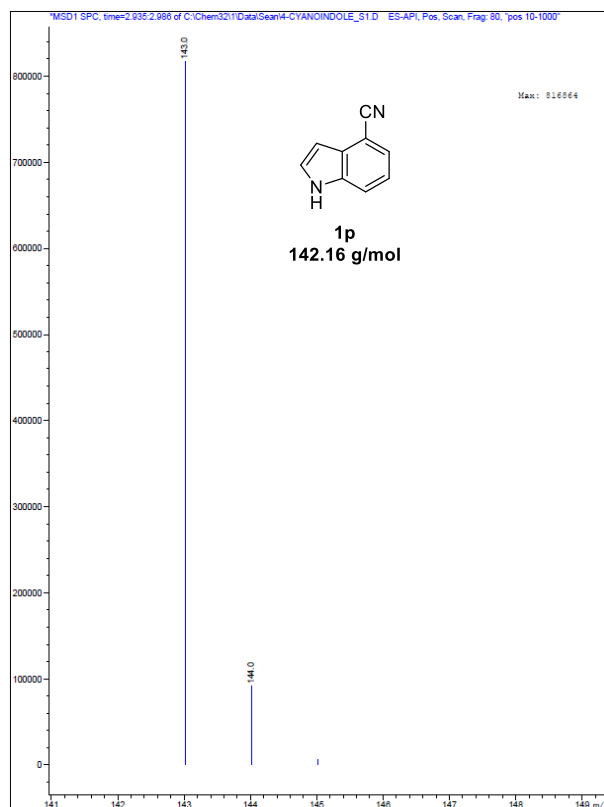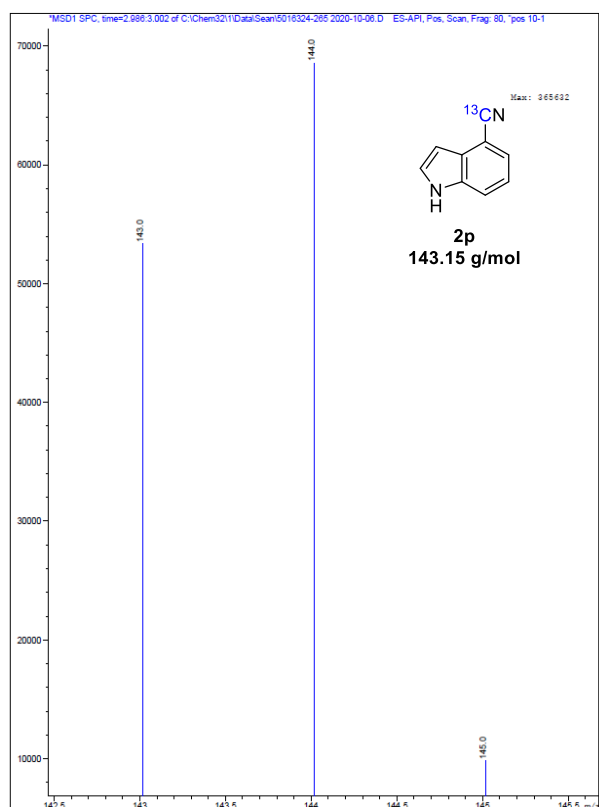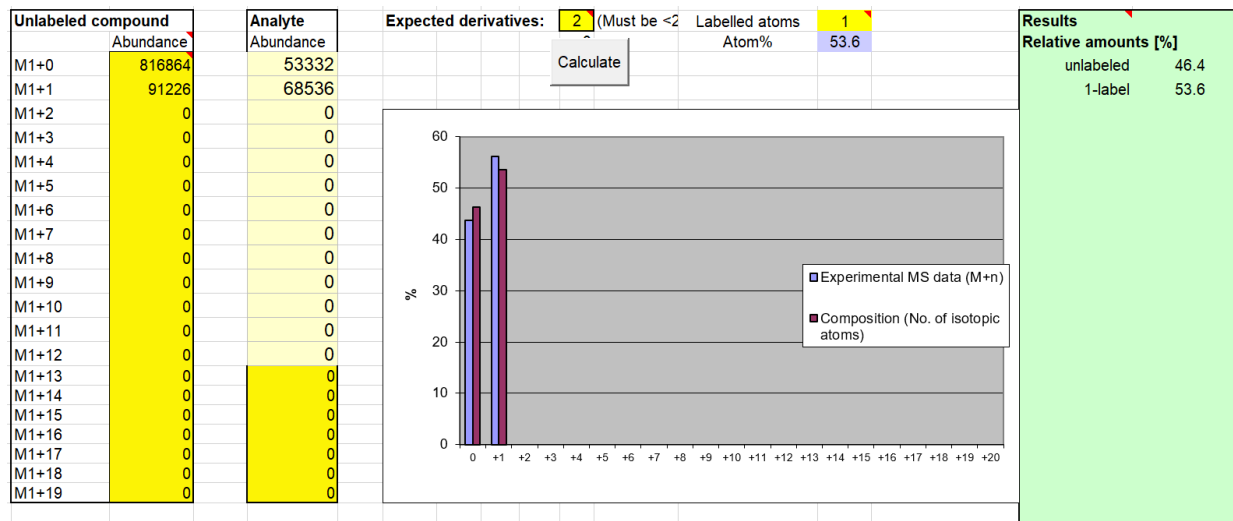

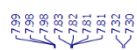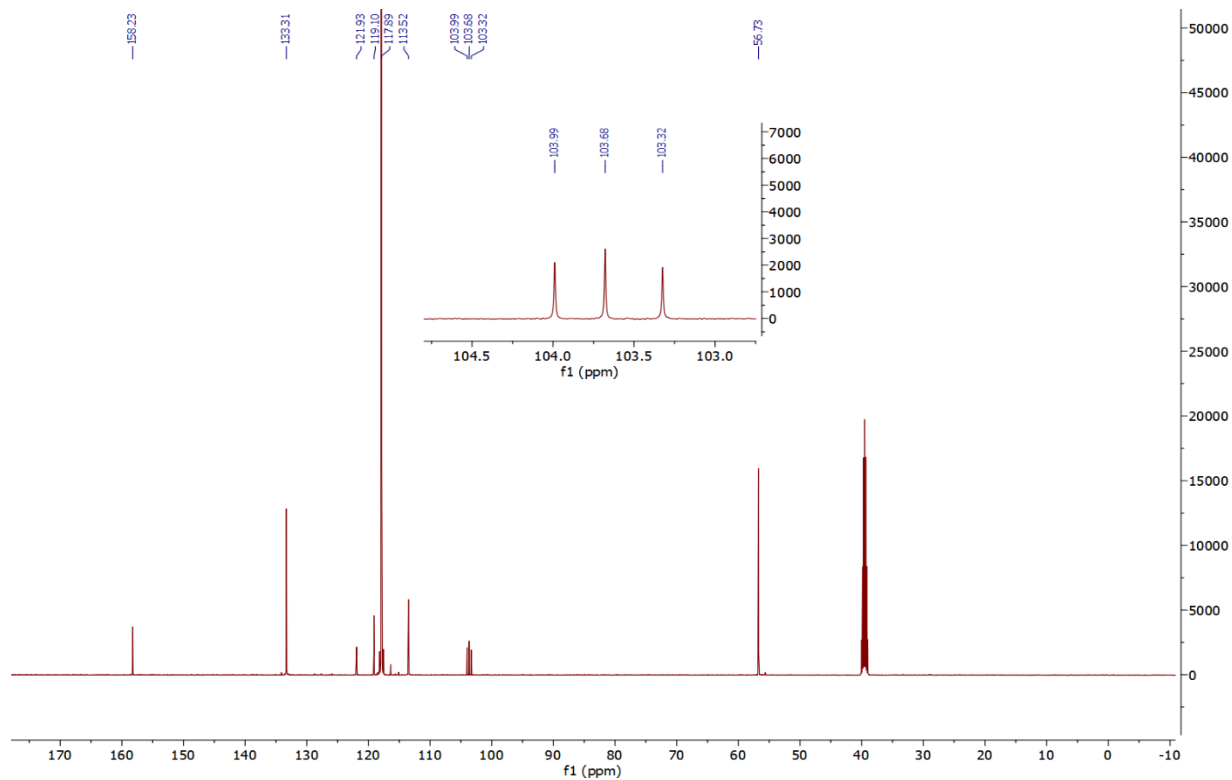



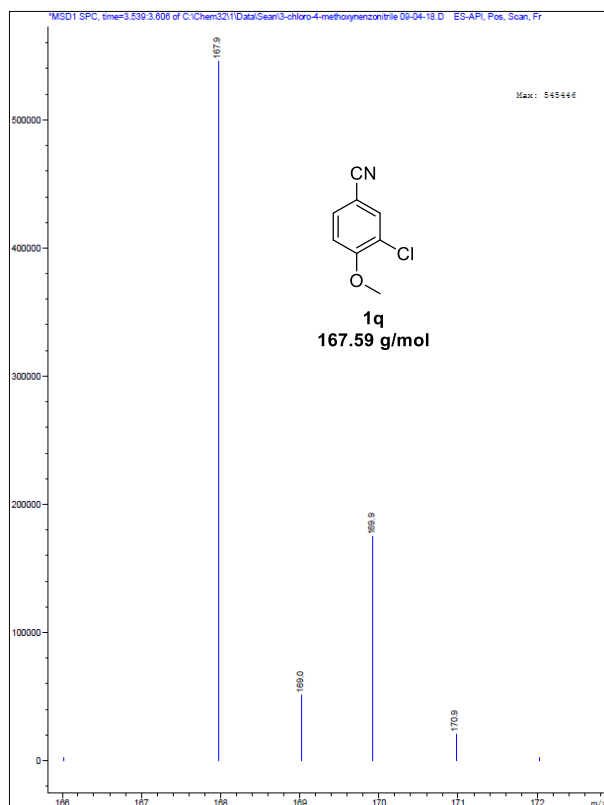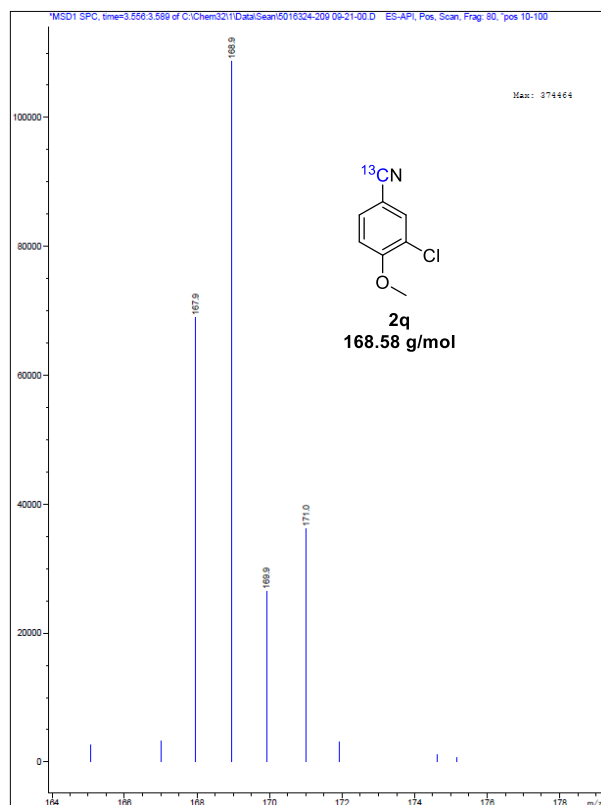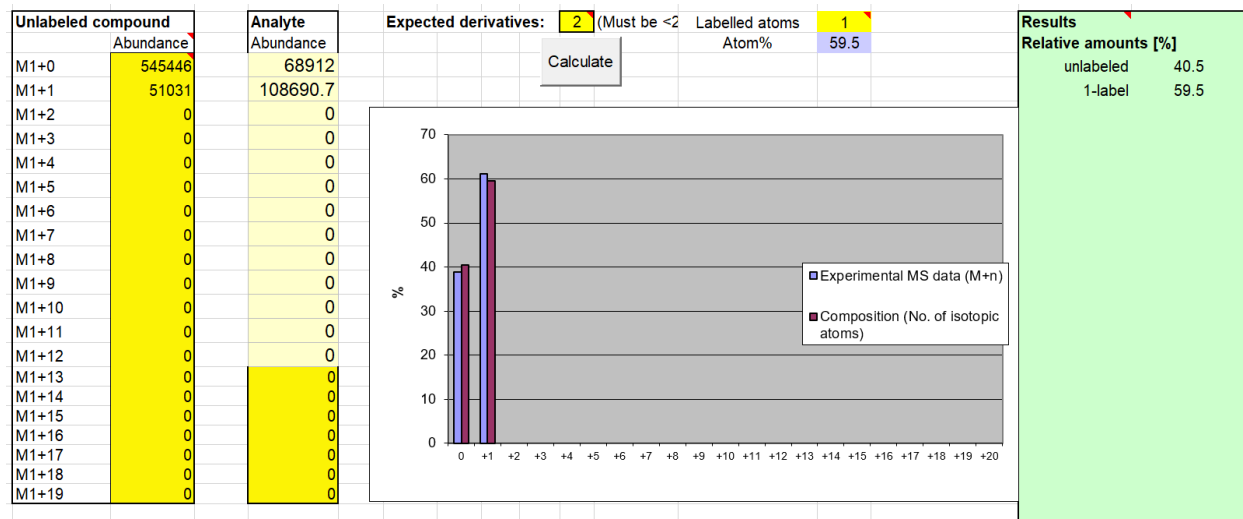

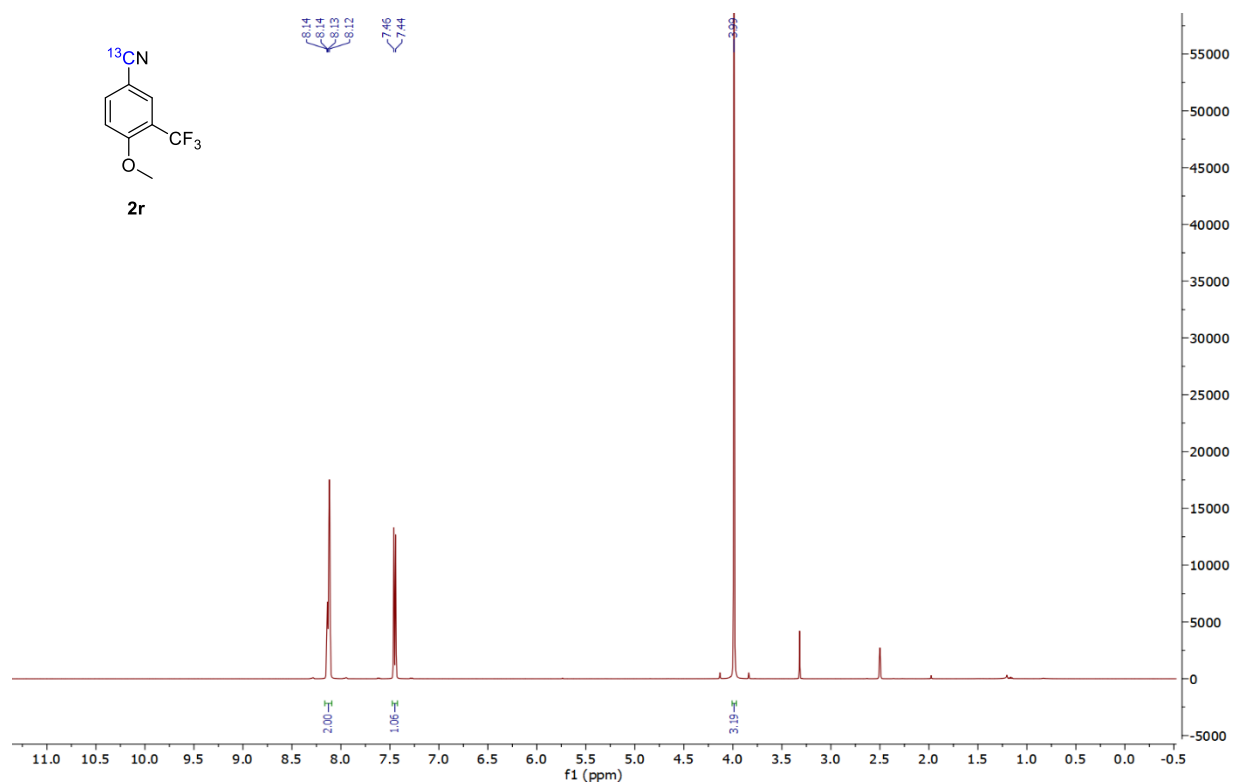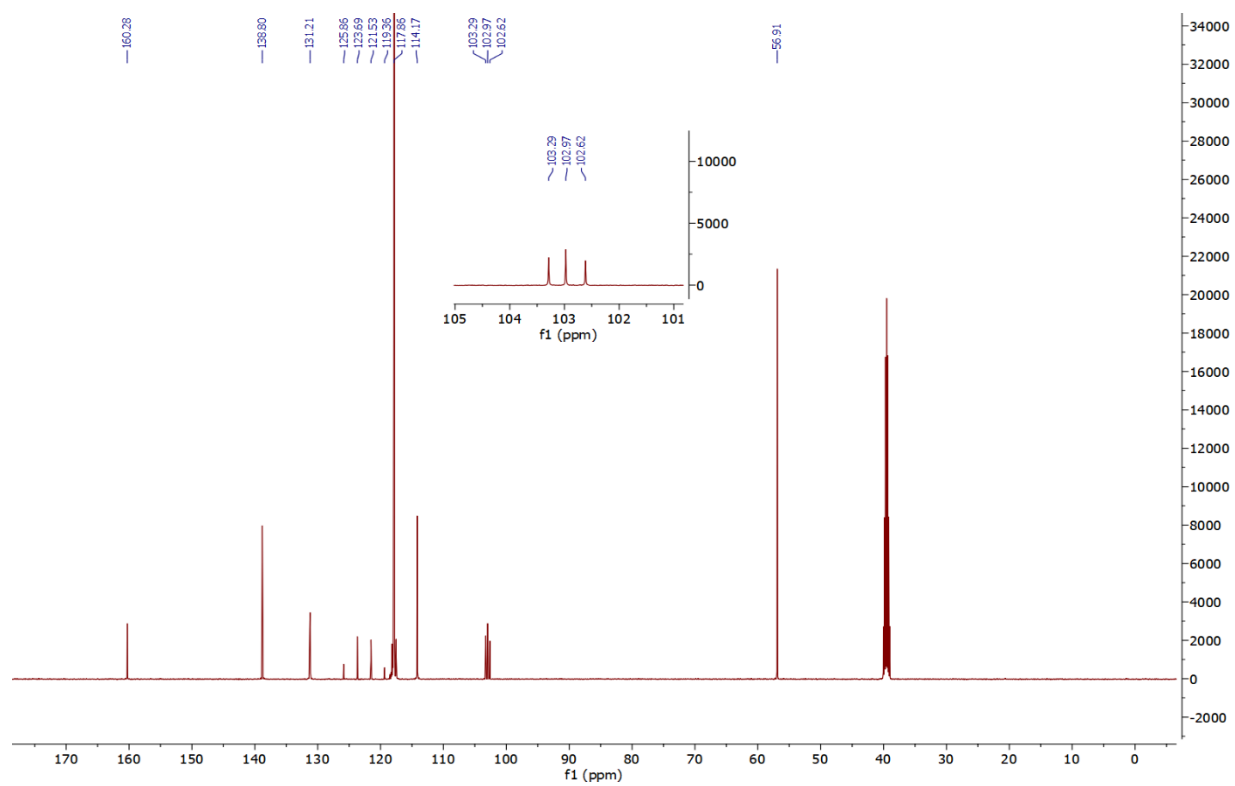

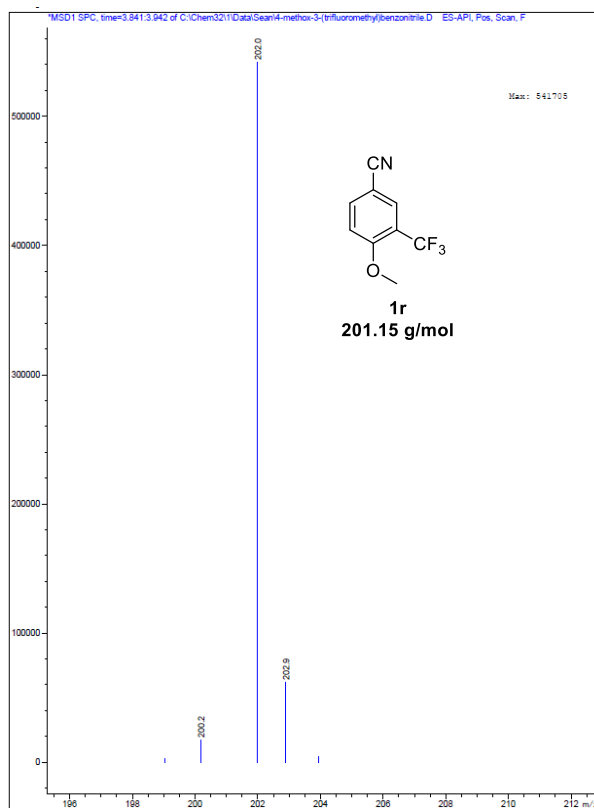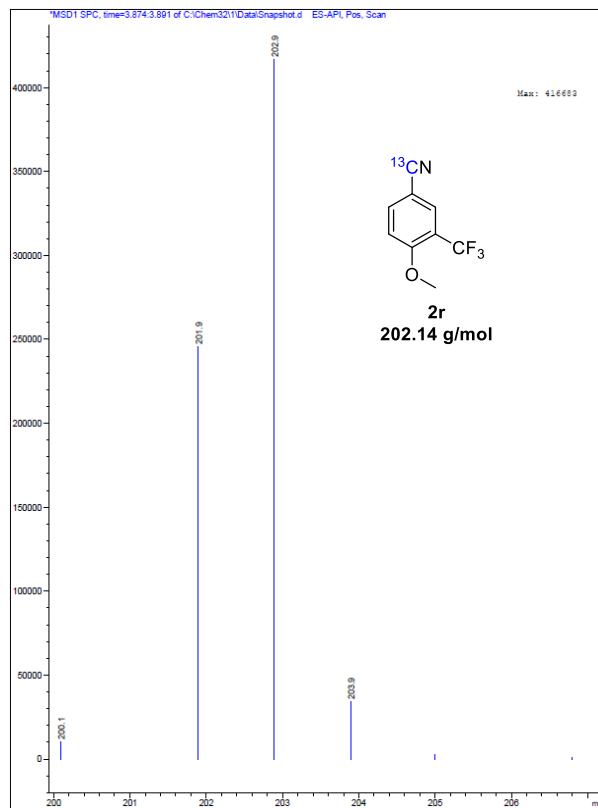

| Unlabeled compound |        | Analyte   |  | Expected derivatives: 2 (Must be <2) |  | Labelled atoms 1 |  | Results              |      |
|--------------------|--------|-----------|--|--------------------------------------|--|------------------|--|----------------------|------|
| Abundance          |        | Abundance |  | Atom%                                |  | Atom% 60.9       |  | Relative amounts [%] |      |
| M1+0               | 541705 | 245861    |  |                                      |  |                  |  | unlabeled            | 39.1 |
| M1+1               | 61570  | 416683    |  |                                      |  |                  |  | 1-label              | 60.9 |
| M1+2               | 0      | 0         |  |                                      |  |                  |  |                      |      |
| M1+3               | 0      | 0         |  |                                      |  |                  |  |                      |      |
| M1+4               | 0      | 0         |  |                                      |  |                  |  |                      |      |
| M1+5               | 0      | 0         |  |                                      |  |                  |  |                      |      |
| M1+6               | 0      | 0         |  |                                      |  |                  |  |                      |      |
| M1+7               | 0      | 0         |  |                                      |  |                  |  |                      |      |
| M1+8               | 0      | 0         |  |                                      |  |                  |  |                      |      |
| M1+9               | 0      | 0         |  |                                      |  |                  |  |                      |      |
| M1+10              | 0      | 0         |  |                                      |  |                  |  |                      |      |
| M1+11              | 0      | 0         |  |                                      |  |                  |  |                      |      |
| M1+12              | 0      | 0         |  |                                      |  |                  |  |                      |      |
| M1+13              | 0      | 0         |  |                                      |  |                  |  |                      |      |
| M1+14              | 0      | 0         |  |                                      |  |                  |  |                      |      |
| M1+15              | 0      | 0         |  |                                      |  |                  |  |                      |      |
| M1+16              | 0      | 0         |  |                                      |  |                  |  |                      |      |
| M1+17              | 0      | 0         |  |                                      |  |                  |  |                      |      |
| M1+18              | 0      | 0         |  |                                      |  |                  |  |                      |      |
| M1+19              | 0      | 0         |  |                                      |  |                  |  |                      |      |

Calculate

| M+n | Experimental MS data (M+n) [%] | Composition (No. of isotopic atoms) [%] |
|-----|--------------------------------|-----------------------------------------|
| 0   | 37                             | 39.1                                    |
| +1  | 62                             | 60.9                                    |

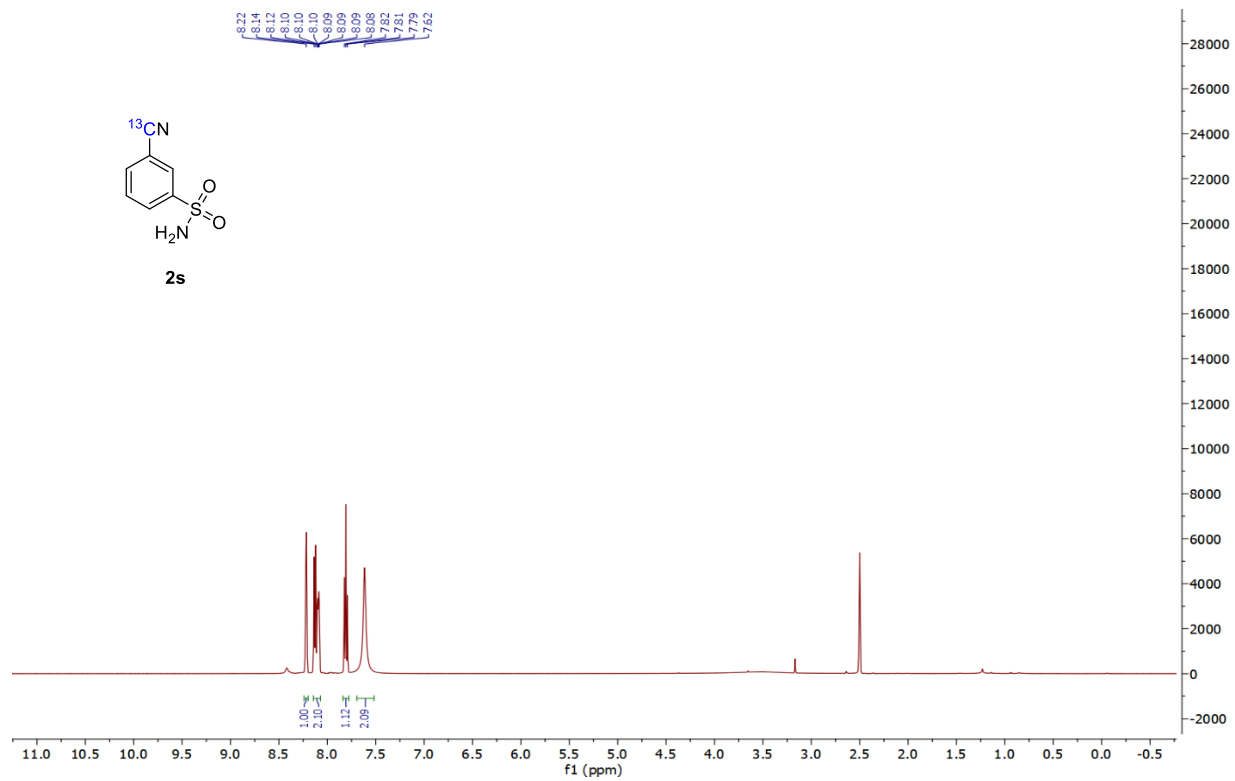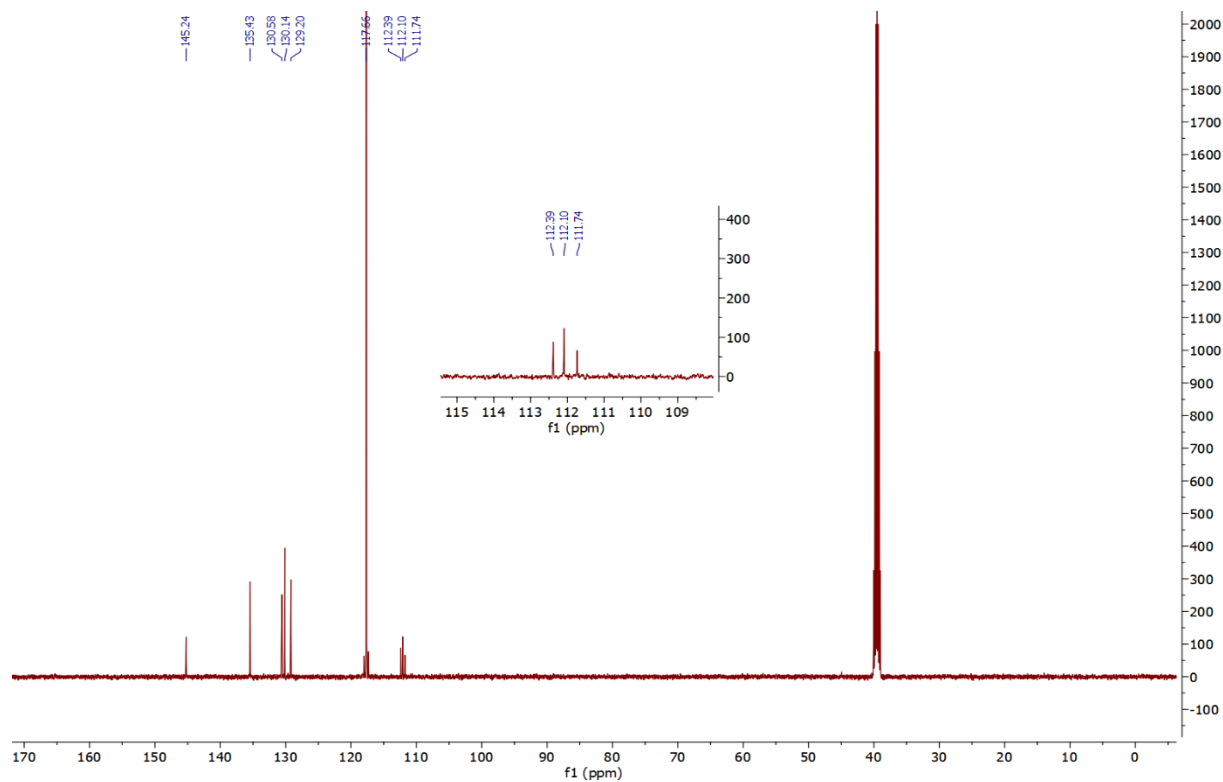

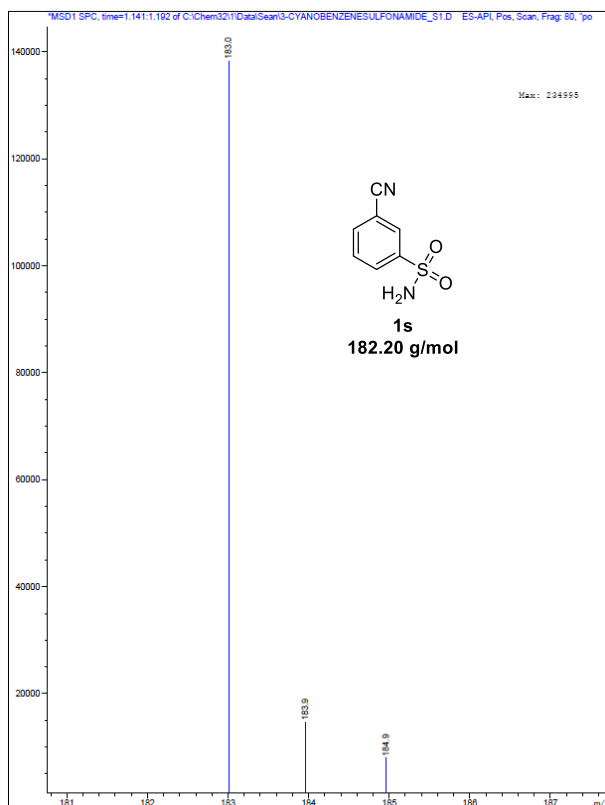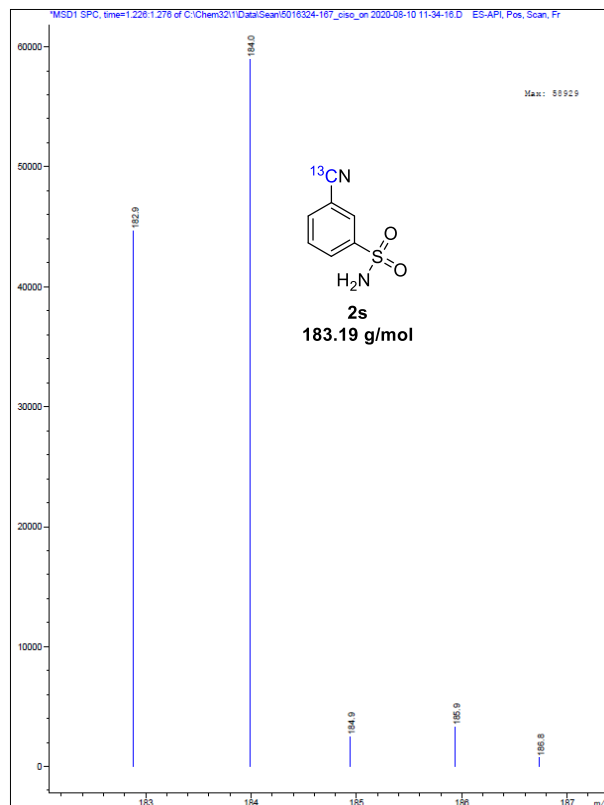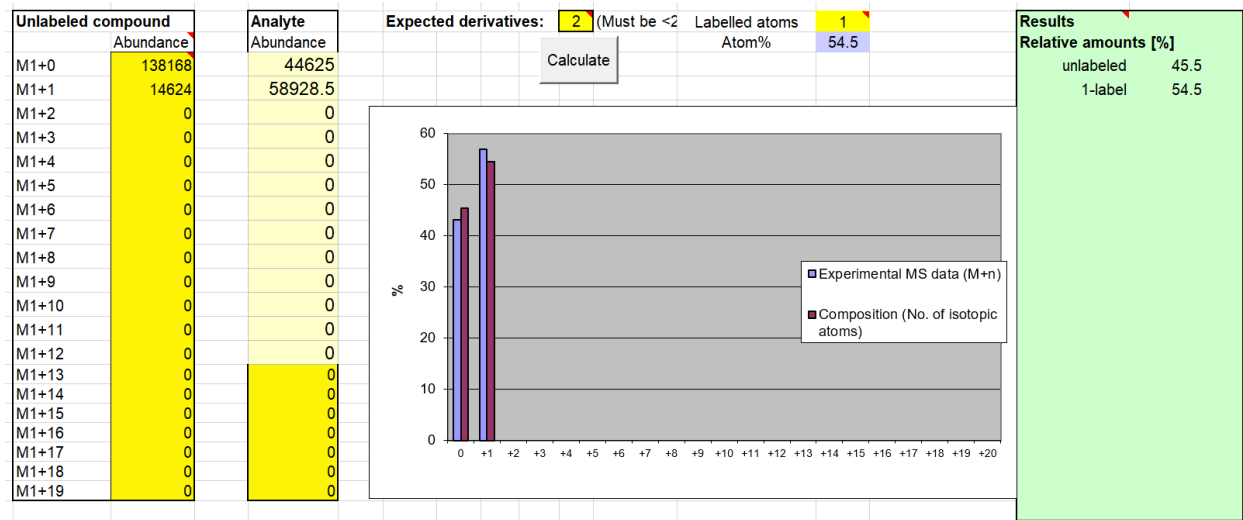

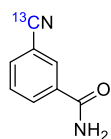

2t

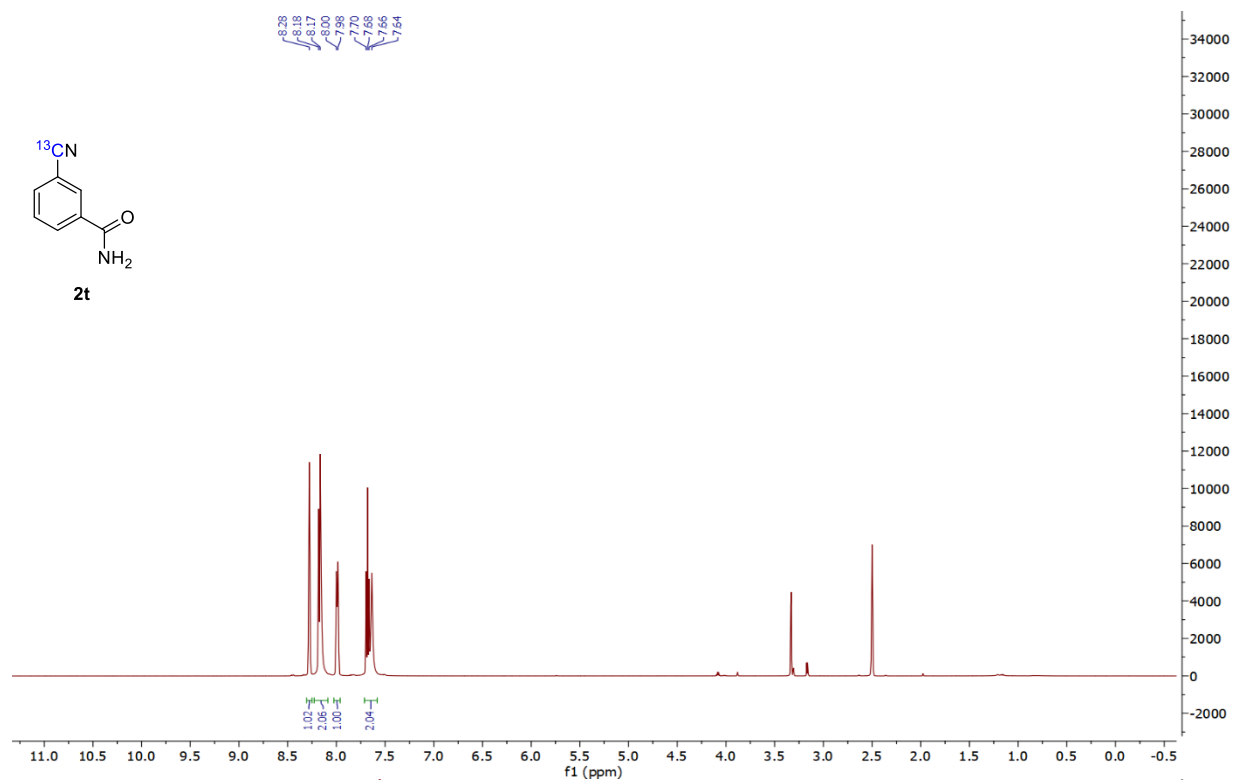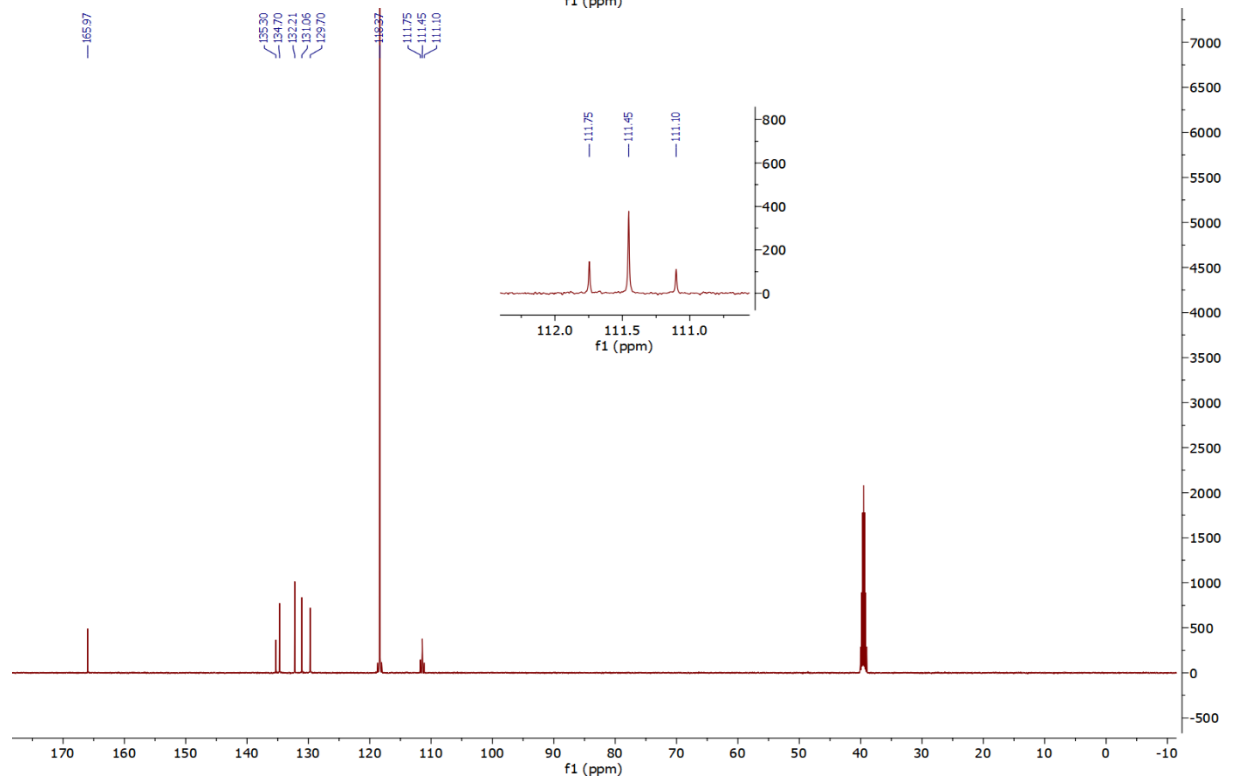

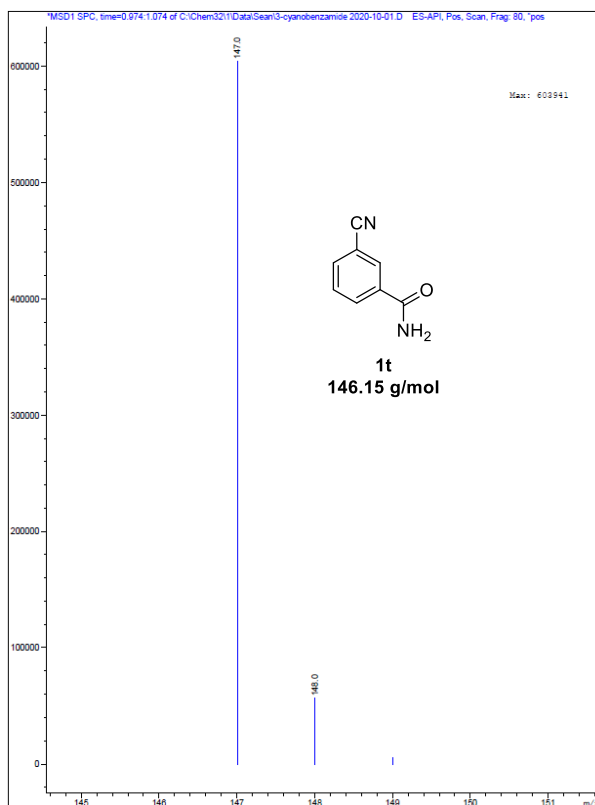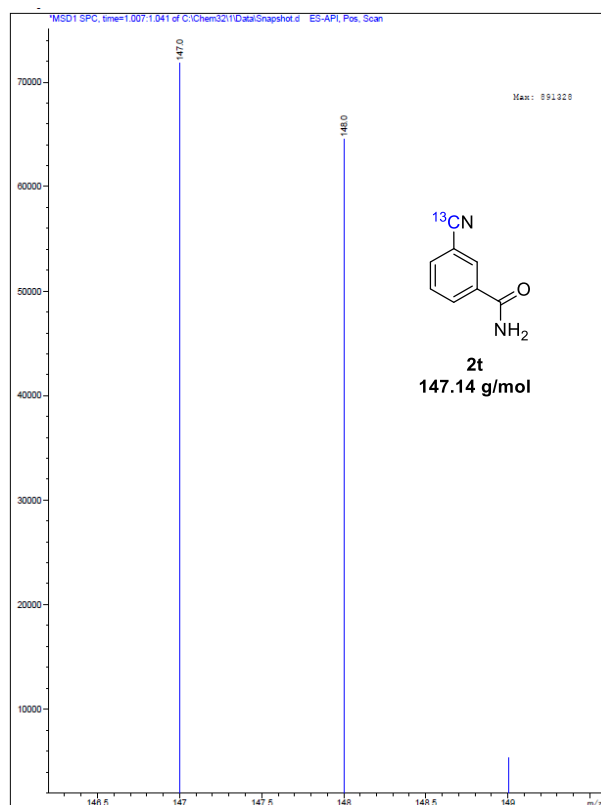

| Unlabeled compound | Abundance | Analyte | Abundance |
|--------------------|-----------|---------|-----------|
| M1+0               | 603941    | M1+0    | 71792     |
| M1+1               | 56406     | M1+1    | 64504     |
| M1+2               | 0         | M1+2    | 0         |
| M1+3               | 0         | M1+3    | 0         |
| M1+4               | 0         | M1+4    | 0         |
| M1+5               | 0         | M1+5    | 0         |
| M1+6               | 0         | M1+6    | 0         |
| M1+7               | 0         | M1+7    | 0         |
| M1+8               | 0         | M1+8    | 0         |
| M1+9               | 0         | M1+9    | 0         |
| M1+10              | 0         | M1+10   | 0         |
| M1+11              | 0         | M1+11   | 0         |
| M1+12              | 0         | M1+12   | 0         |
| M1+13              | 0         | M1+13   | 0         |
| M1+14              | 0         | M1+14   | 0         |
| M1+15              | 0         | M1+15   | 0         |
| M1+16              | 0         | M1+16   | 0         |
| M1+17              | 0         | M1+17   | 0         |
| M1+18              | 0         | M1+18   | 0         |
| M1+19              | 0         | M1+19   | 0         |

Expected derivatives: **2** (Must be <2)

Labelled atoms: **1**

Atom%: **44.4**

Calculate

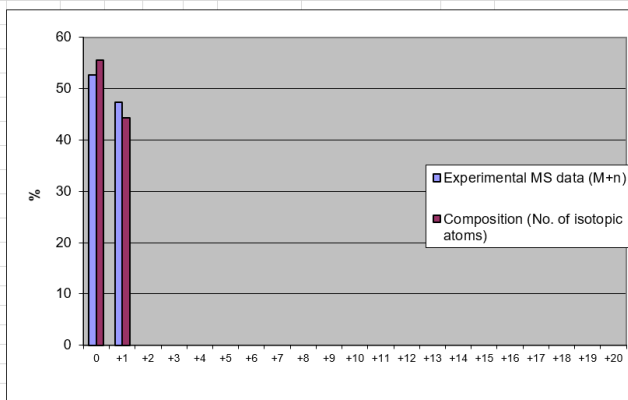

**Results**

Relative amounts [%]

|           |      |
|-----------|------|
| unlabeled | 55.6 |
| 1-label   | 44.4 |

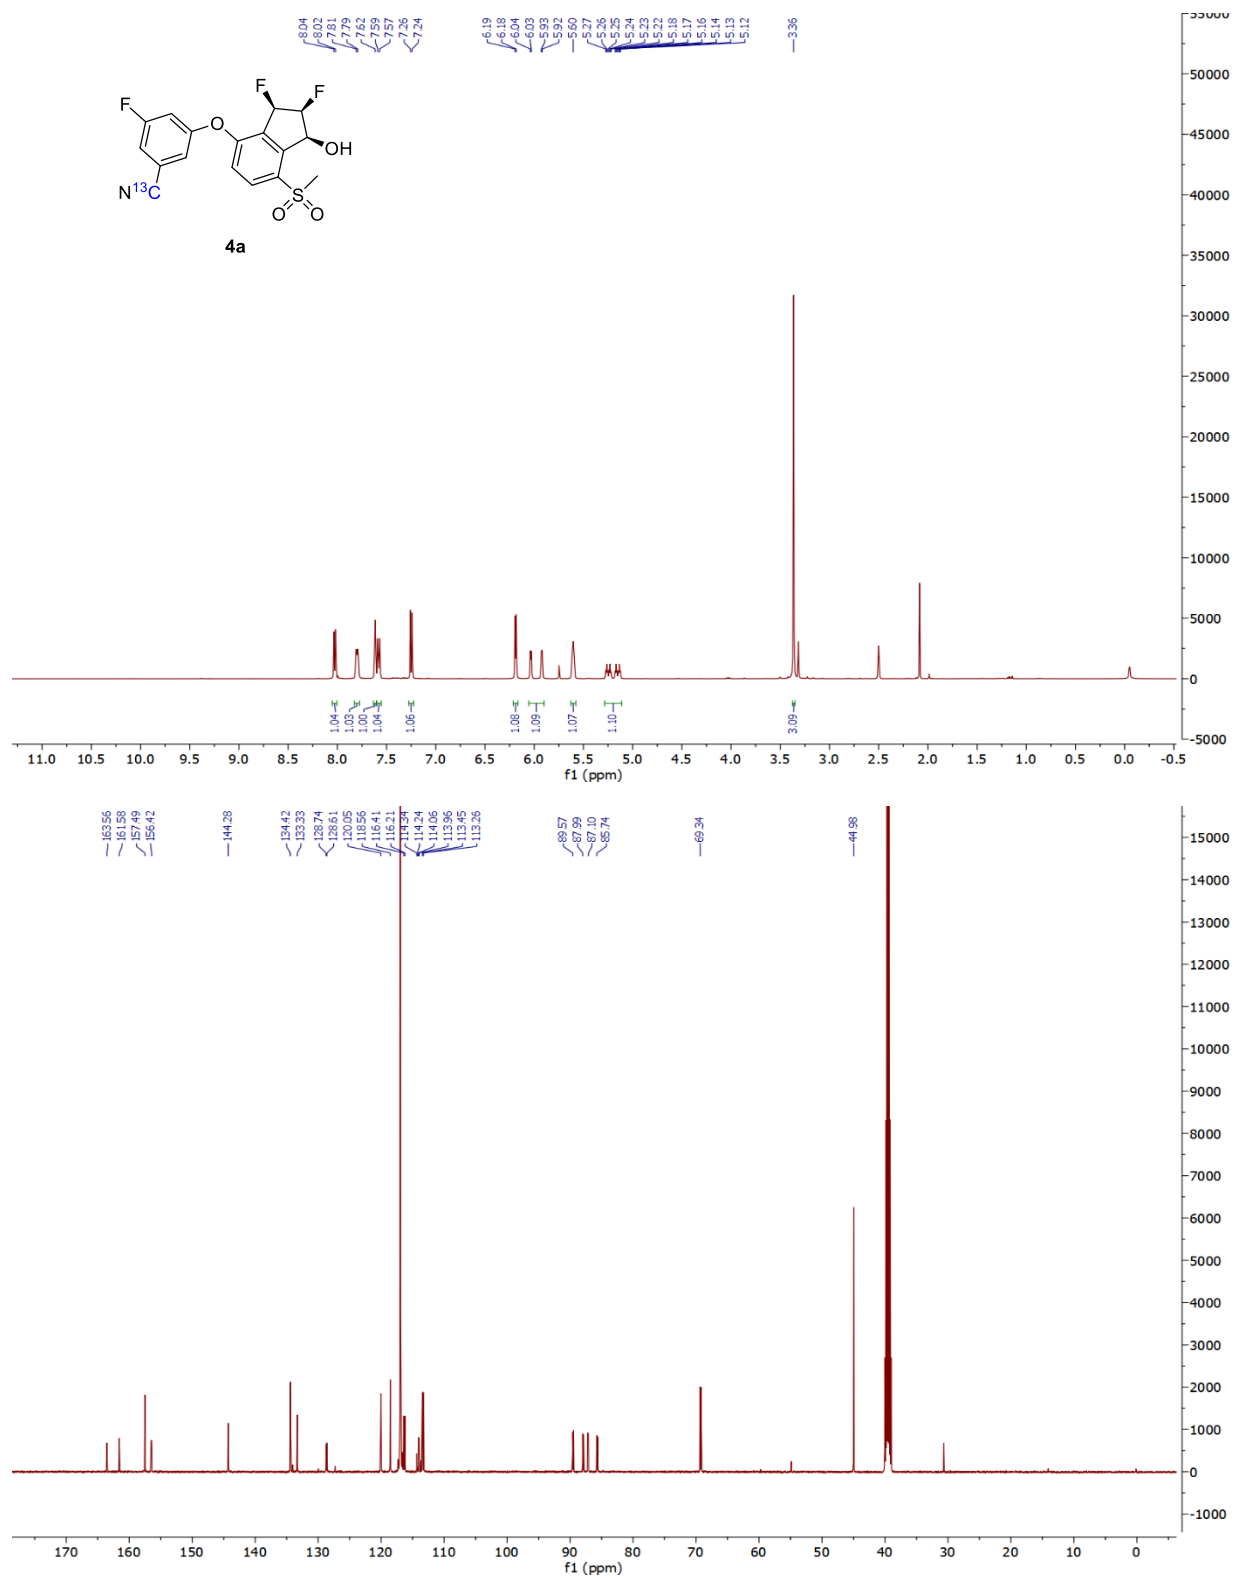



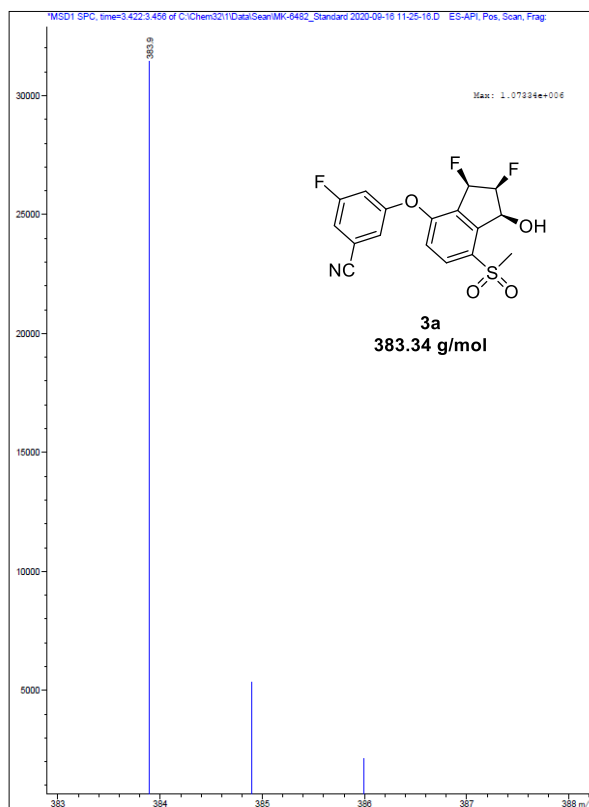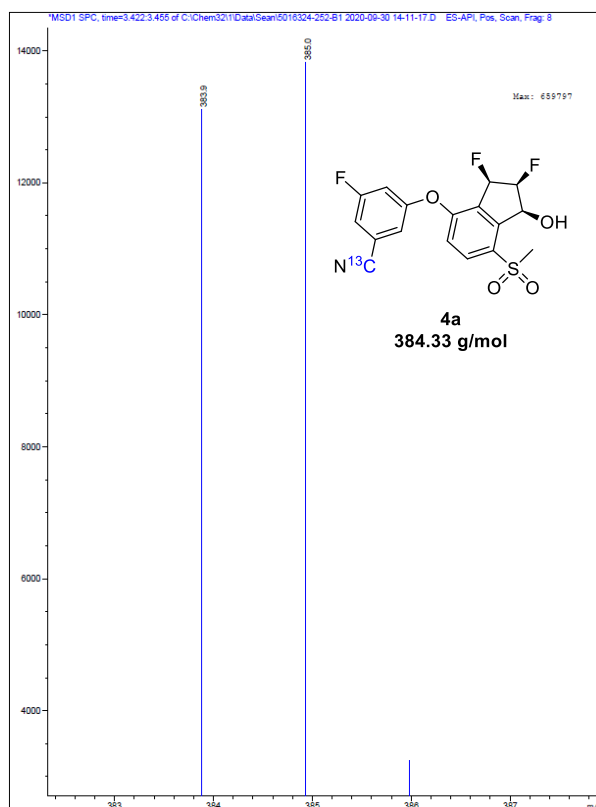

| Unlabeled compound | Abundance |
|--------------------|-----------|
| M1+0               | 31429     |
| M1+1               | 5354      |
| M1+2               | 0         |
| M1+3               | 0         |
| M1+4               | 0         |
| M1+5               | 0         |
| M1+6               | 0         |
| M1+7               | 0         |
| M1+8               | 0         |
| M1+9               | 0         |
| M1+10              | 0         |
| M1+11              | 0         |
| M1+12              | 0         |
| M1+13              | 0         |
| M1+14              | 0         |
| M1+15              | 0         |
| M1+16              | 0         |
| M1+17              | 0         |
| M1+18              | 0         |
| M1+19              | 0         |

| Analyte | Abundance |
|---------|-----------|
| M1+0    | 12056.5   |
| M1+1    | 13152     |
| M1+2    | 0         |
| M1+3    | 0         |
| M1+4    | 0         |
| M1+5    | 0         |
| M1+6    | 0         |
| M1+7    | 0         |
| M1+8    | 0         |
| M1+9    | 0         |
| M1+10   | 0         |
| M1+11   | 0         |
| M1+12   | 0         |
| M1+13   | 0         |
| M1+14   | 0         |
| M1+15   | 0         |
| M1+16   | 0         |
| M1+17   | 0         |
| M1+18   | 0         |
| M1+19   | 0         |

Expected derivatives: 2 (Must be <2)

Labelled atoms 1

Atom% 47.1

Calculate

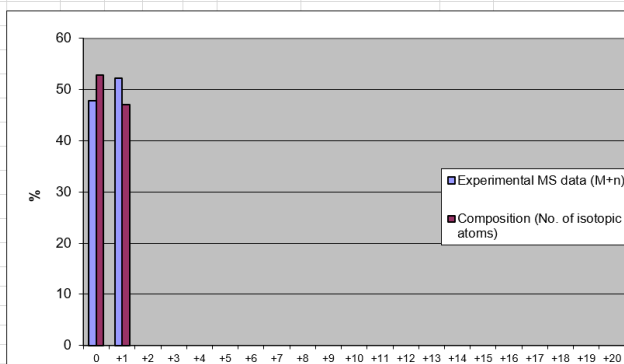

Results

Relative amounts [%]

|           |      |
|-----------|------|
| unlabeled | 52.9 |
| 1-label   | 47.1 |
| 2-label   |      |
| 3-label   |      |
| 4-label   |      |
| 5-label   |      |
| 6-label   |      |
| ...       |      |
| ...       |      |

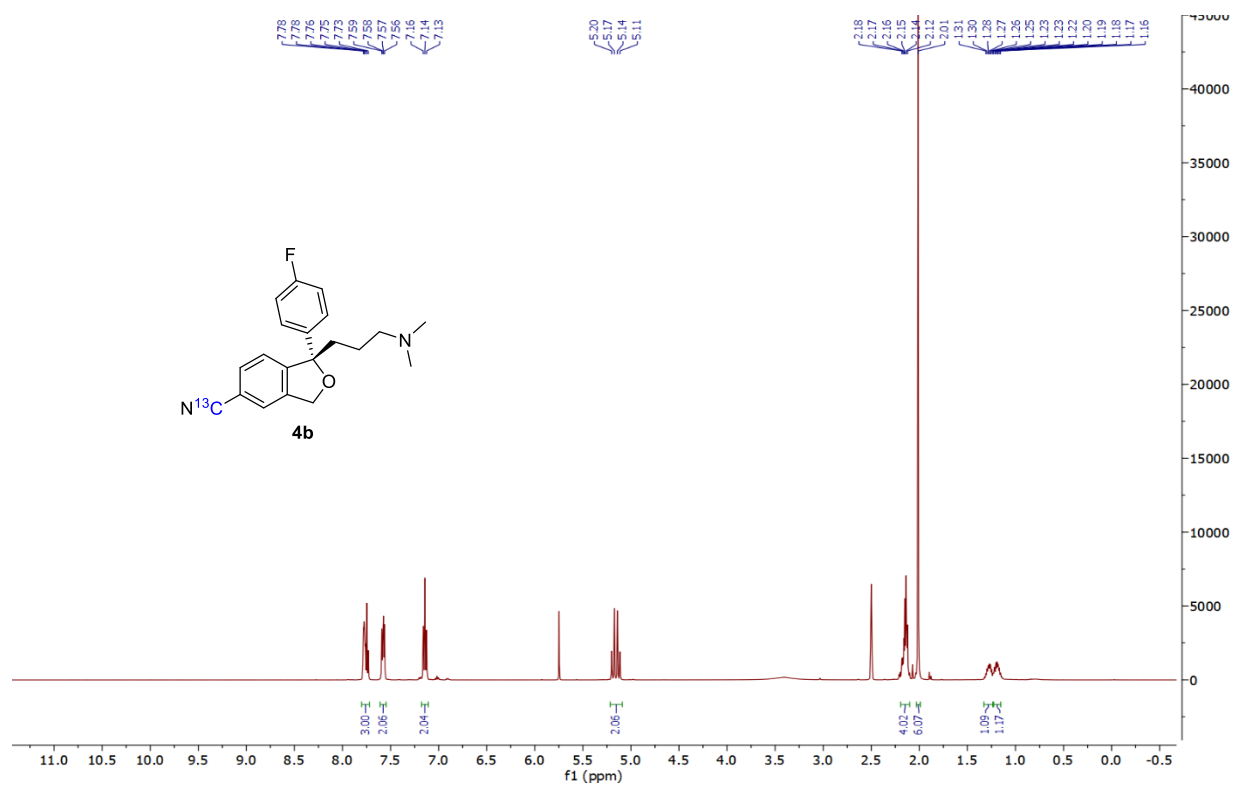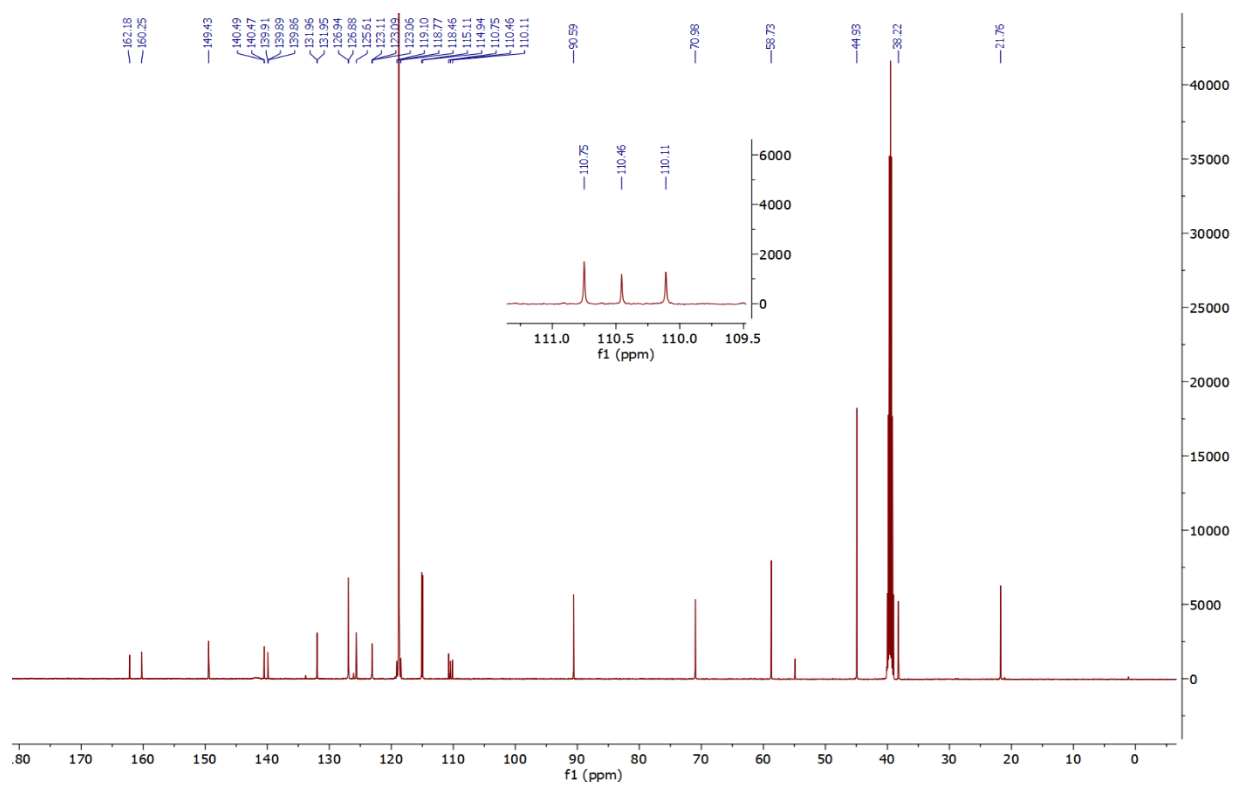

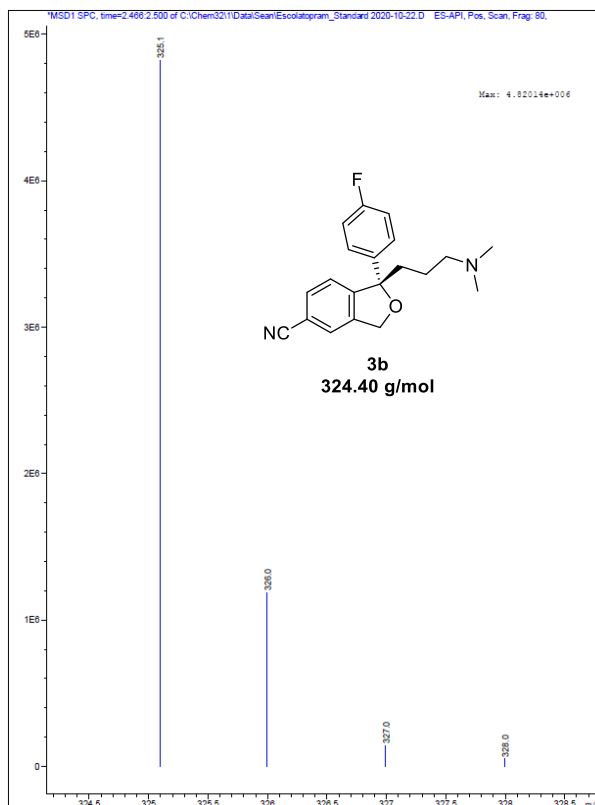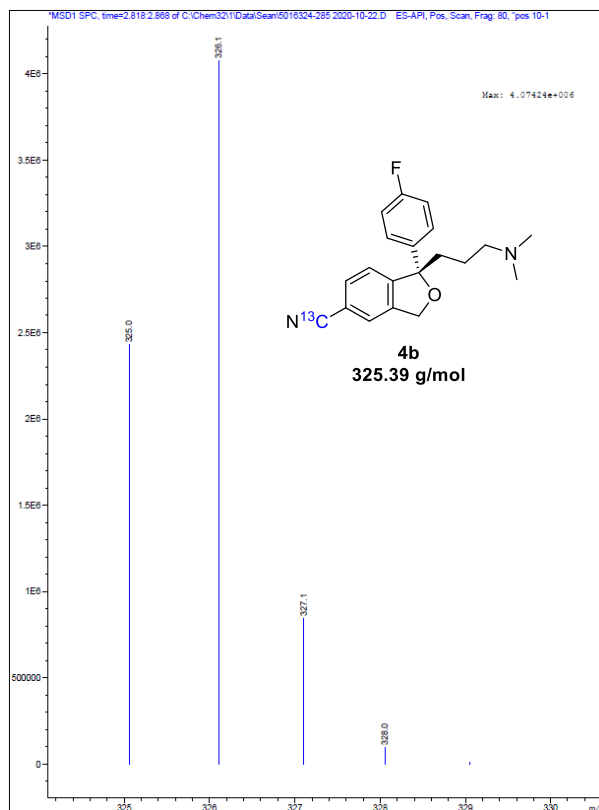

| Unlabeled compound | Abundance | Analyte | Abundance |
|--------------------|-----------|---------|-----------|
| M1+0               | 4820139   |         | 2428928   |
| M1+1               | 1184277   |         | 4074240   |
| M1+2               | 0         |         | 0         |
| M1+3               | 0         |         | 0         |
| M1+4               | 0         |         | 0         |
| M1+5               | 0         |         | 0         |
| M1+6               | 0         |         | 0         |
| M1+7               | 0         |         | 0         |
| M1+8               | 0         |         | 0         |
| M1+9               | 0         |         | 0         |
| M1+10              | 0         |         | 0         |
| M1+11              | 0         |         | 0         |
| M1+12              | 0         |         | 0         |
| M1+13              | 0         |         | 0         |
| M1+14              | 0         |         | 0         |
| M1+15              | 0         |         | 0         |
| M1+16              | 0         |         | 0         |
| M1+17              | 0         |         | 0         |
| M1+18              | 0         |         | 0         |
| M1+19              | 0         |         | 0         |

Expected derivatives: **2** (Must be <2) Labeled atoms **1**

Atom% **56.9**

Calculate

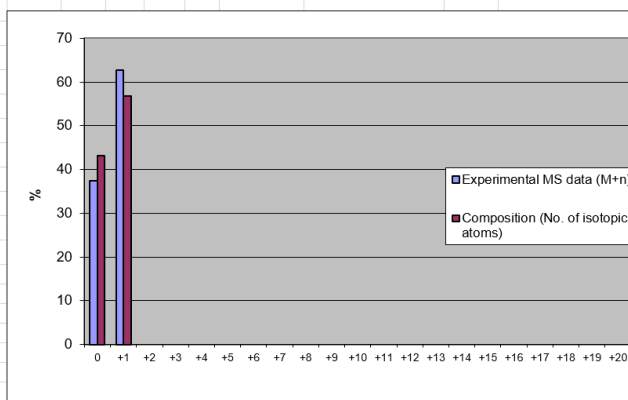

| Results              |      |
|----------------------|------|
| Relative amounts [%] |      |
| unlabeled            | 43.1 |
| 1-label              | 56.9 |
| 2-label              |      |
| 3-label              |      |
| 4-label              |      |
| 5-label              |      |
| 6-label              |      |
| ...                  |      |
| ...                  |      |

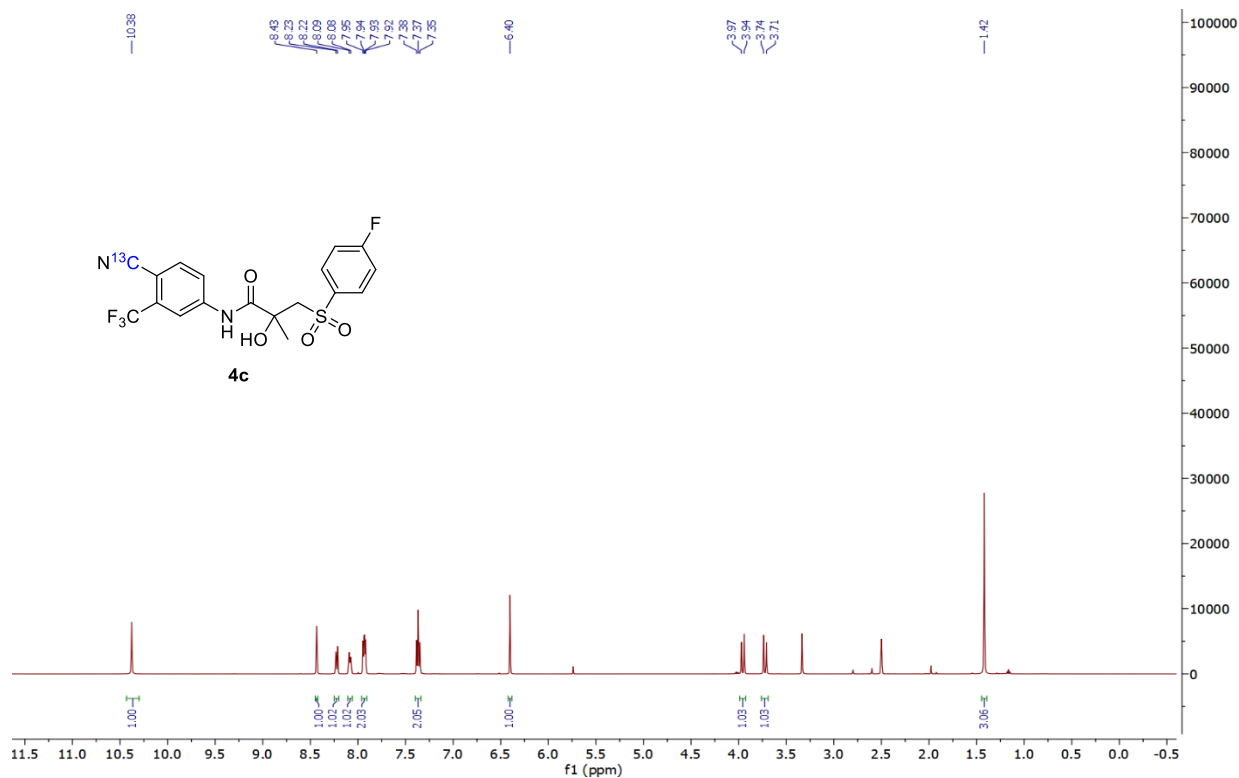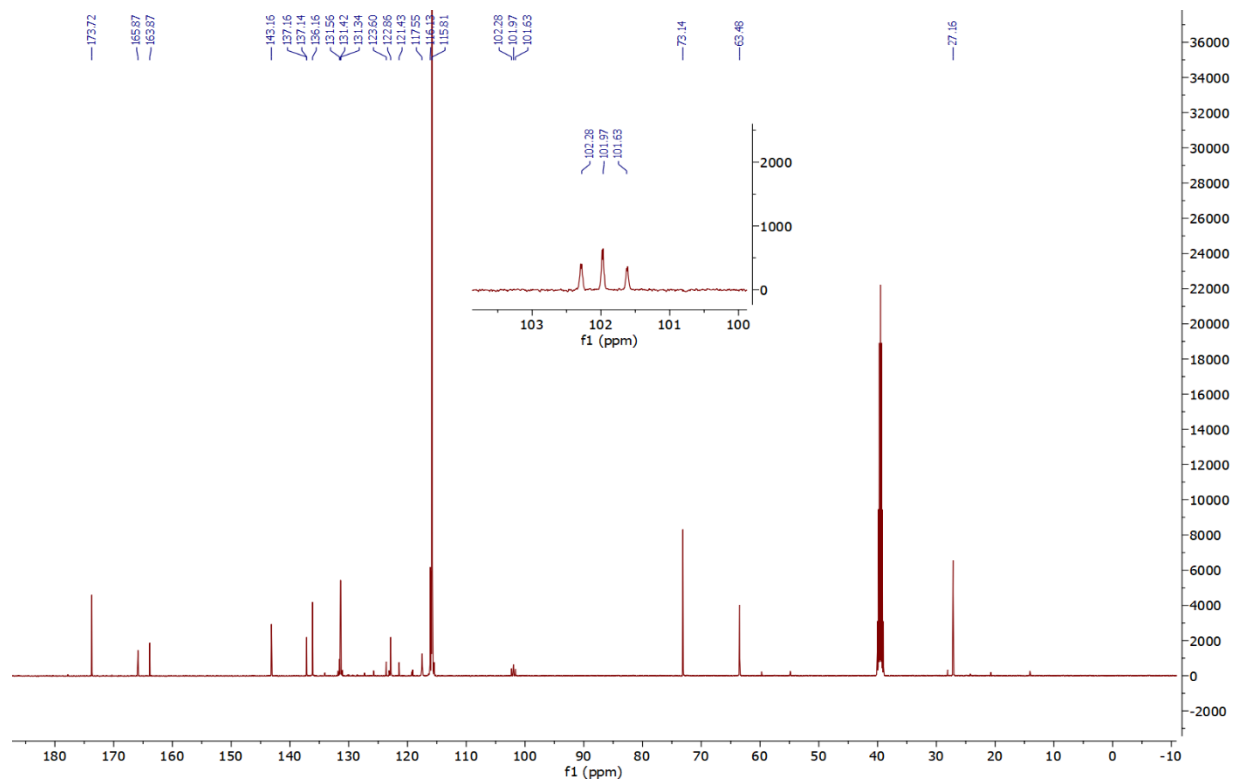

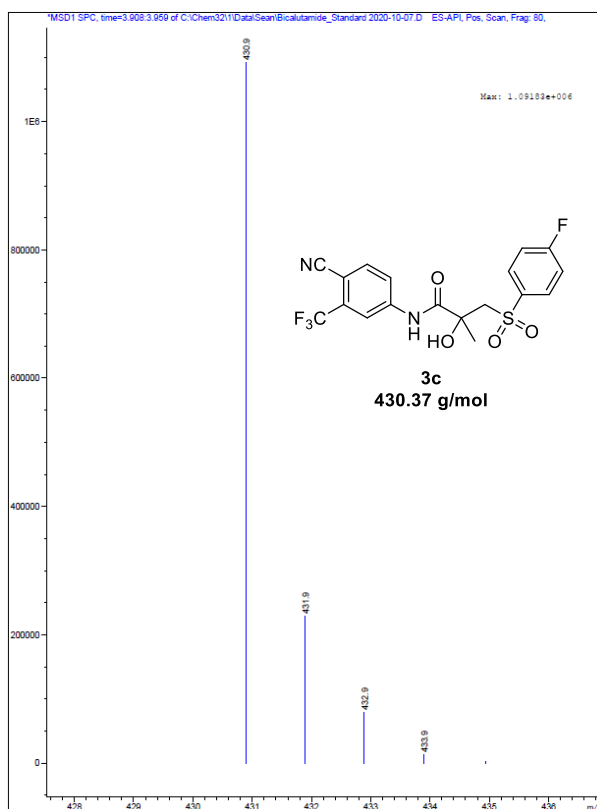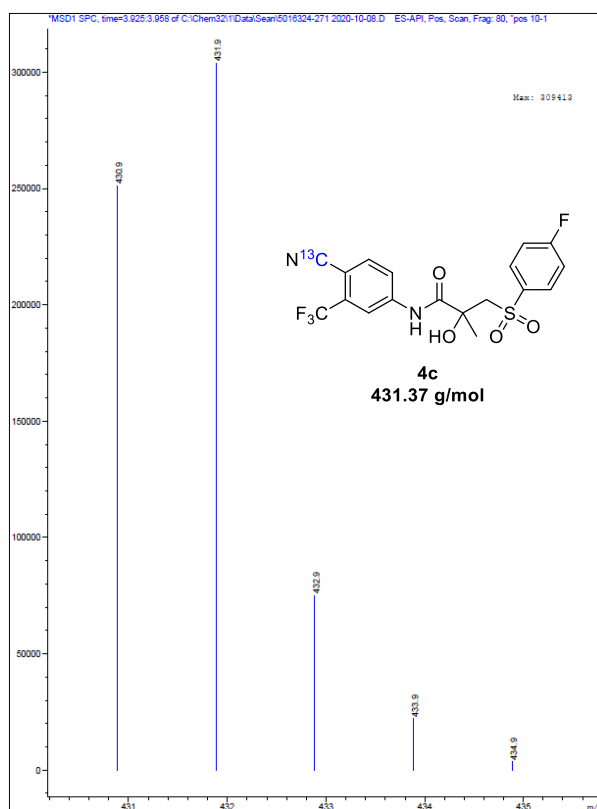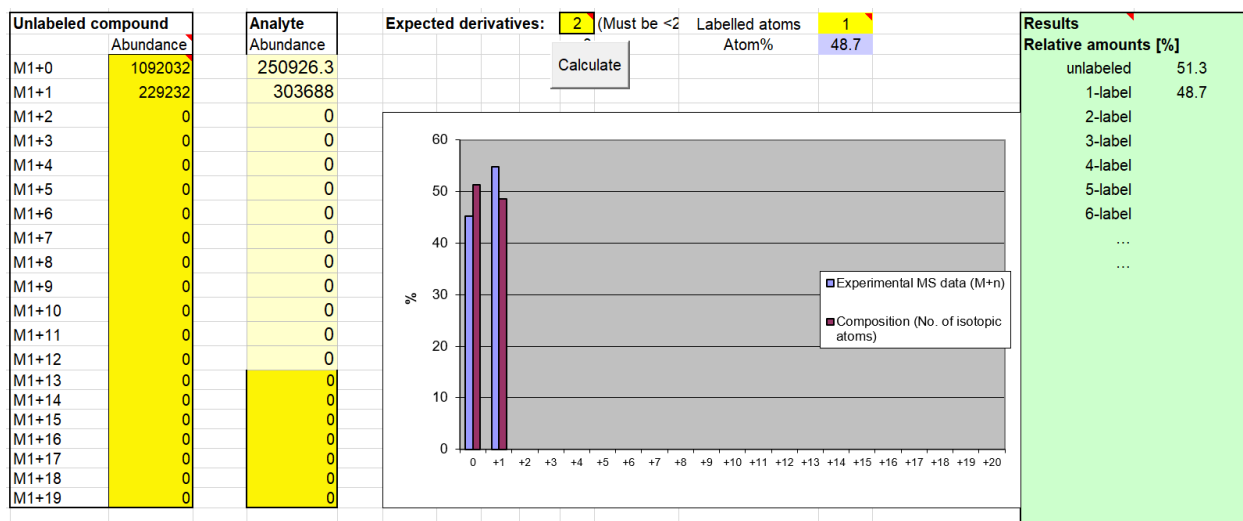

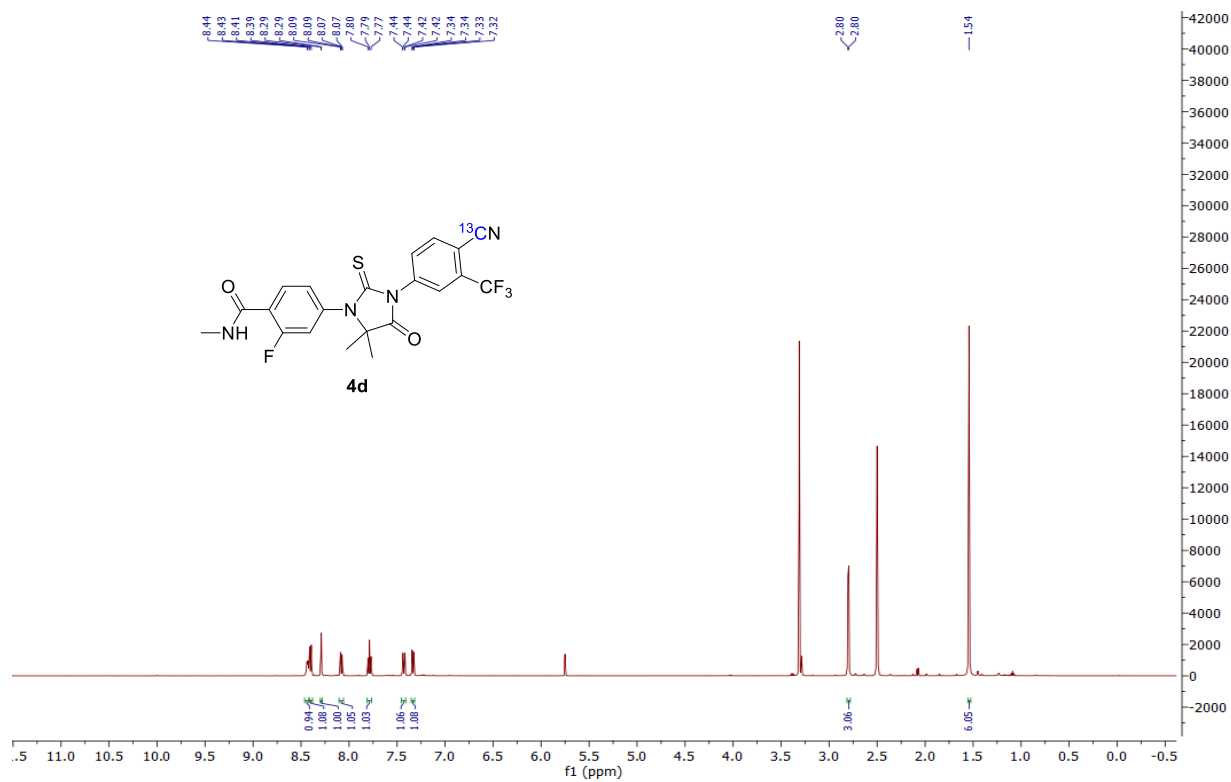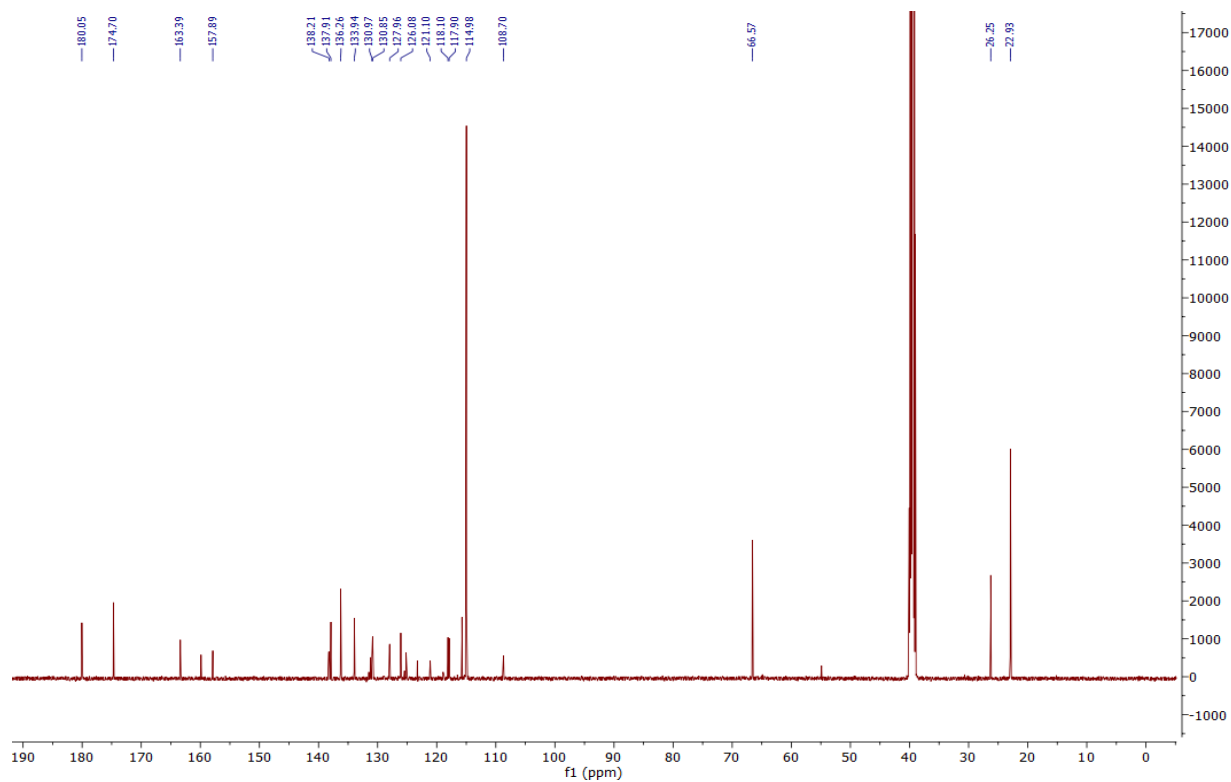

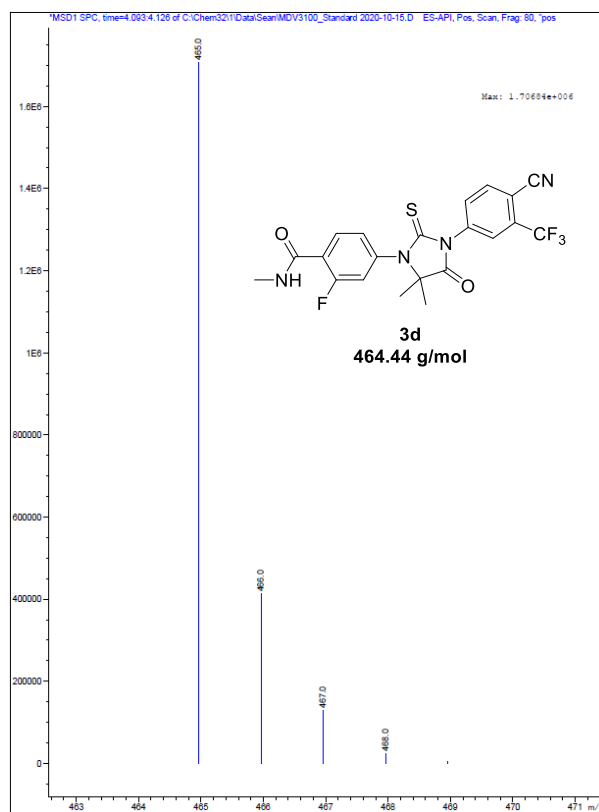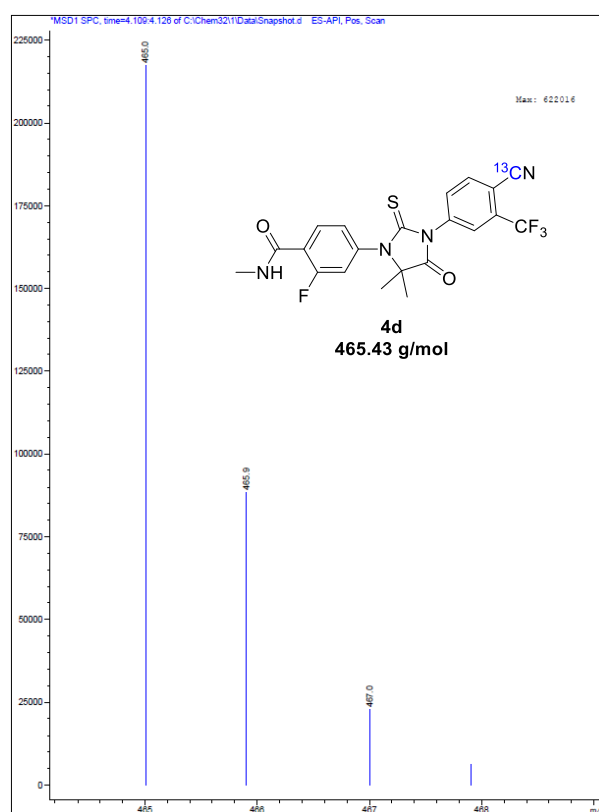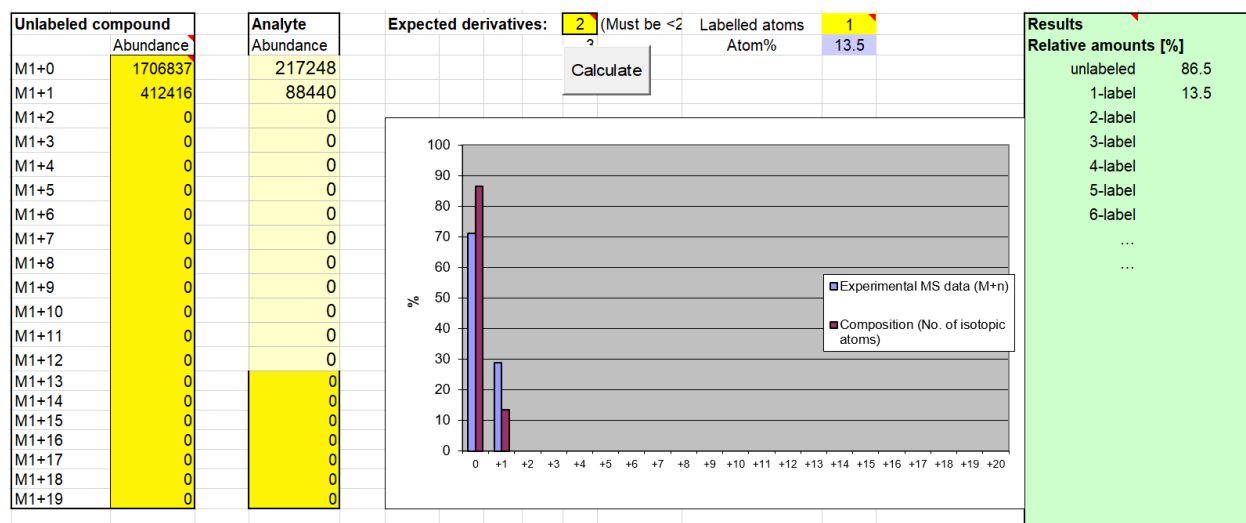

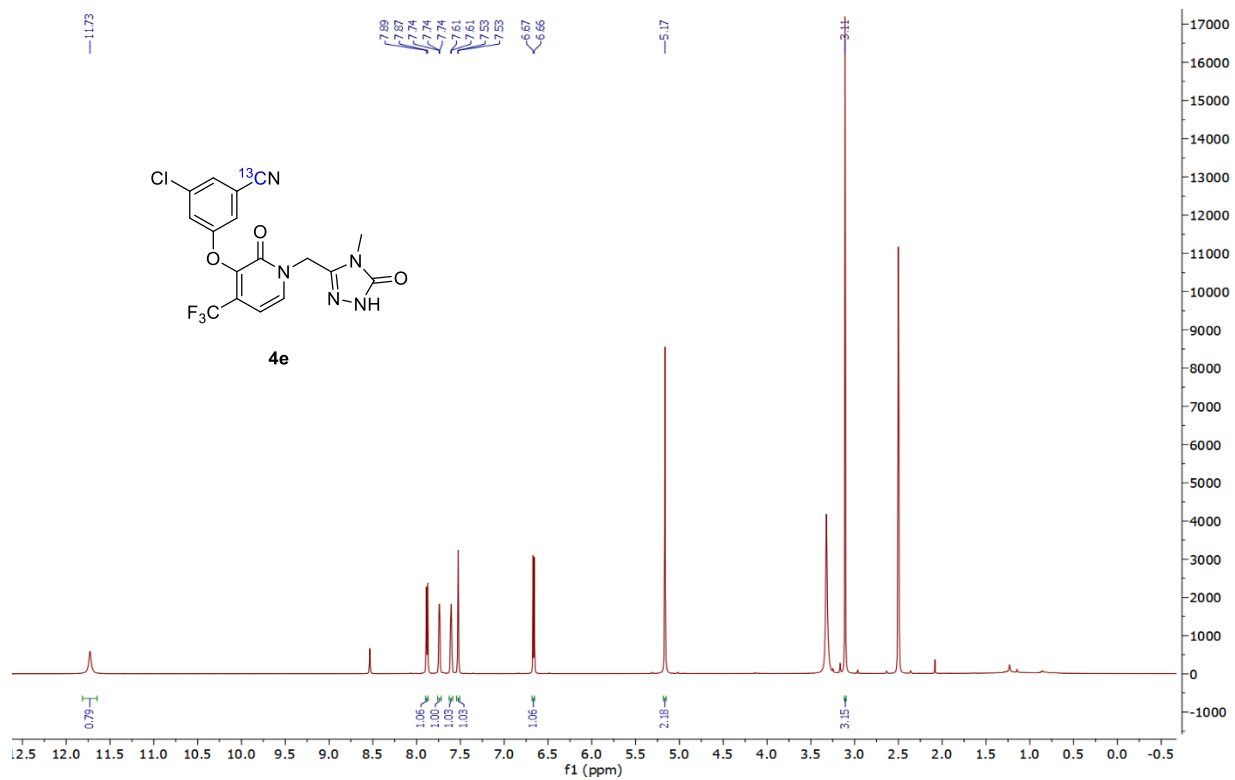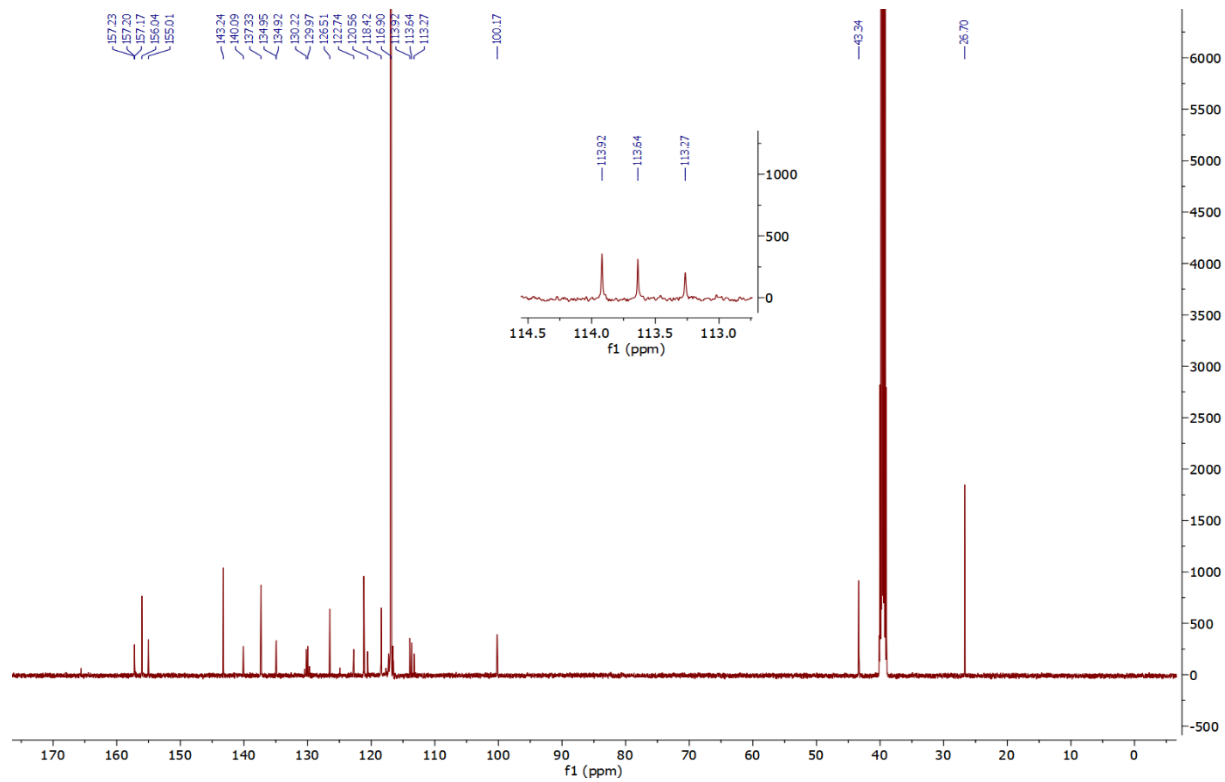



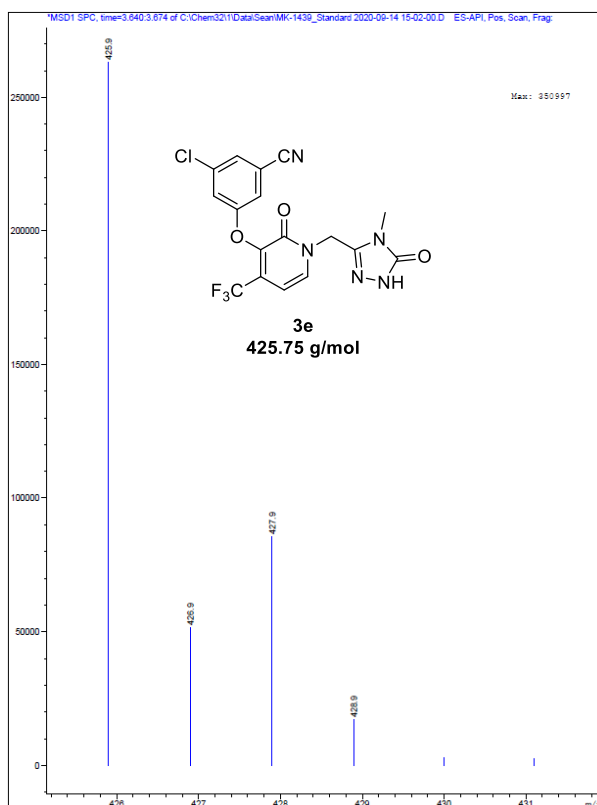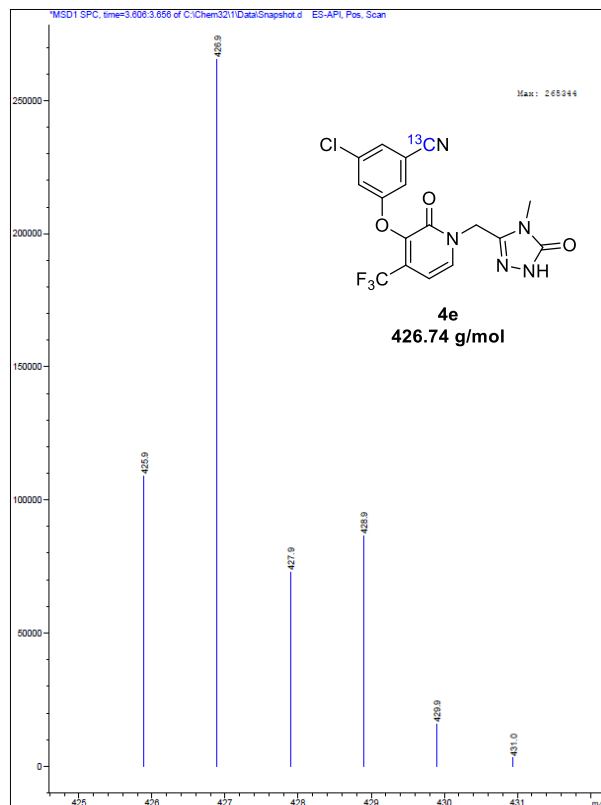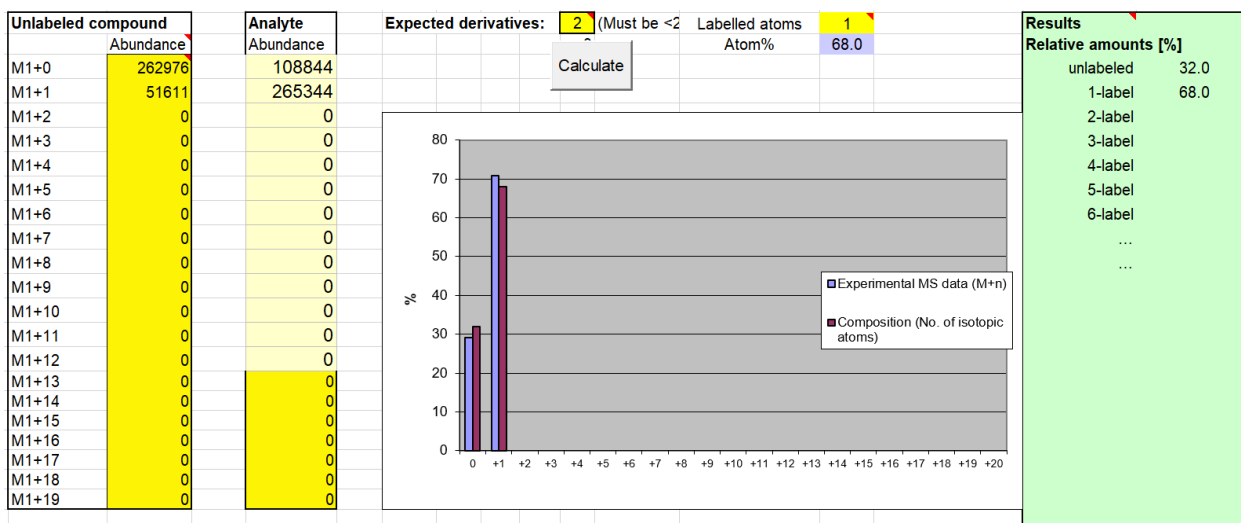

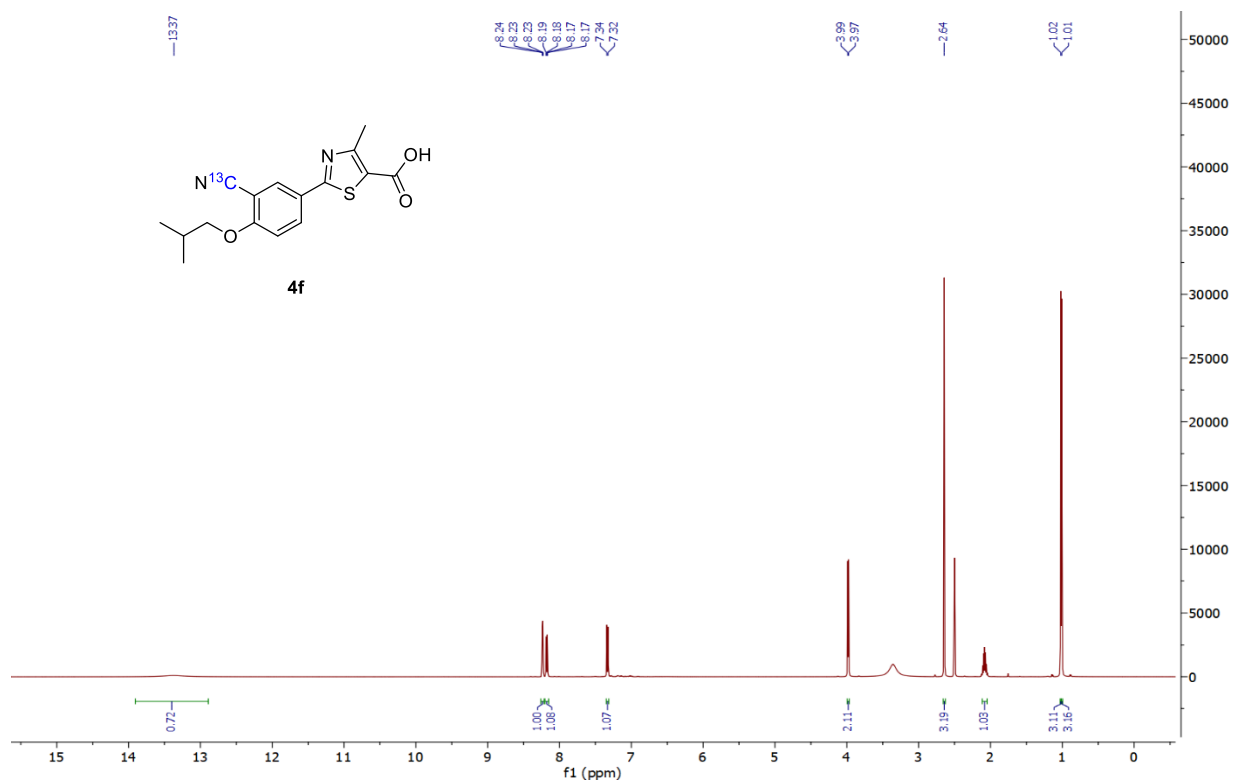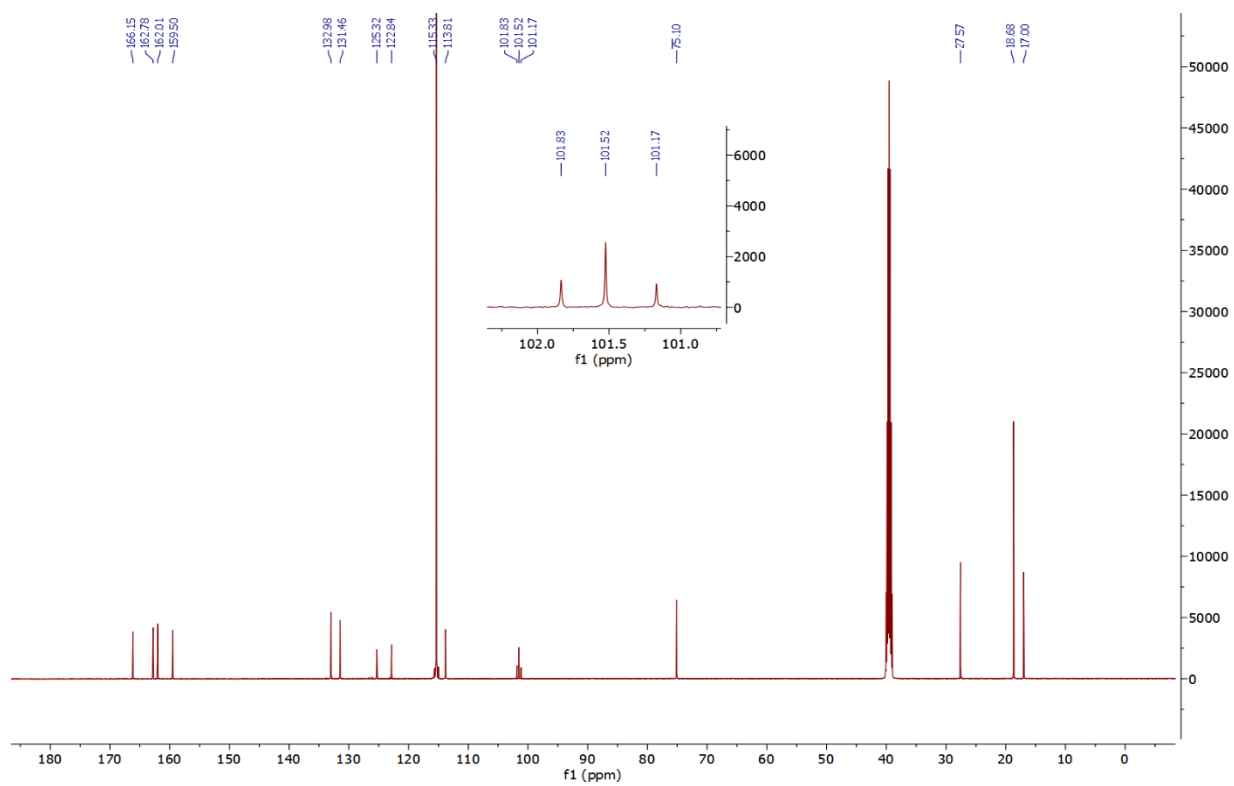

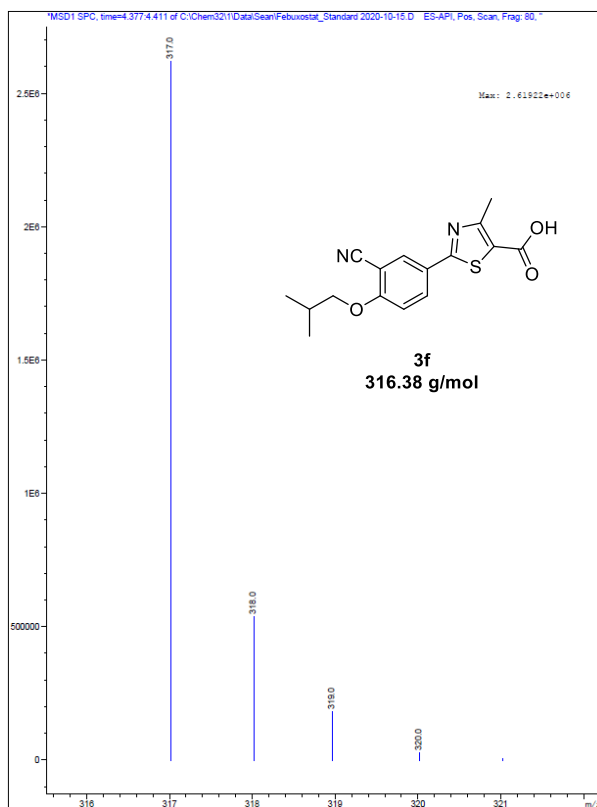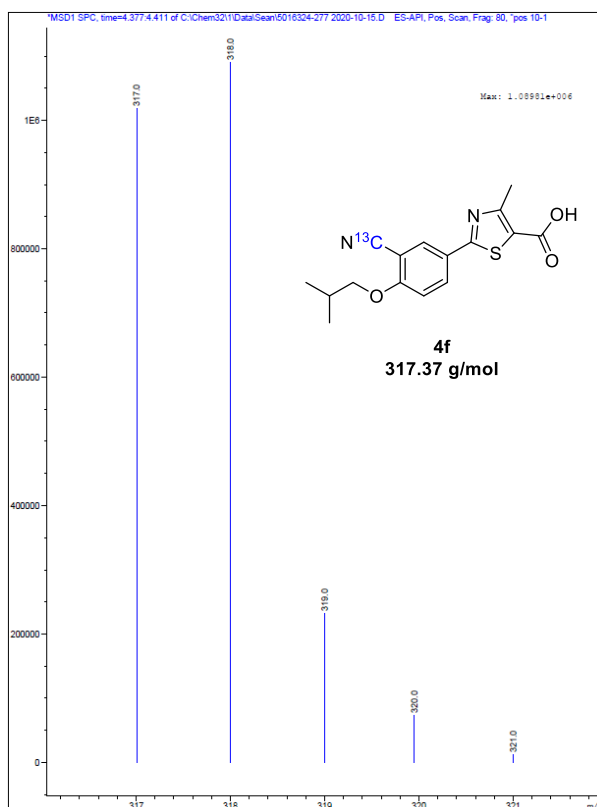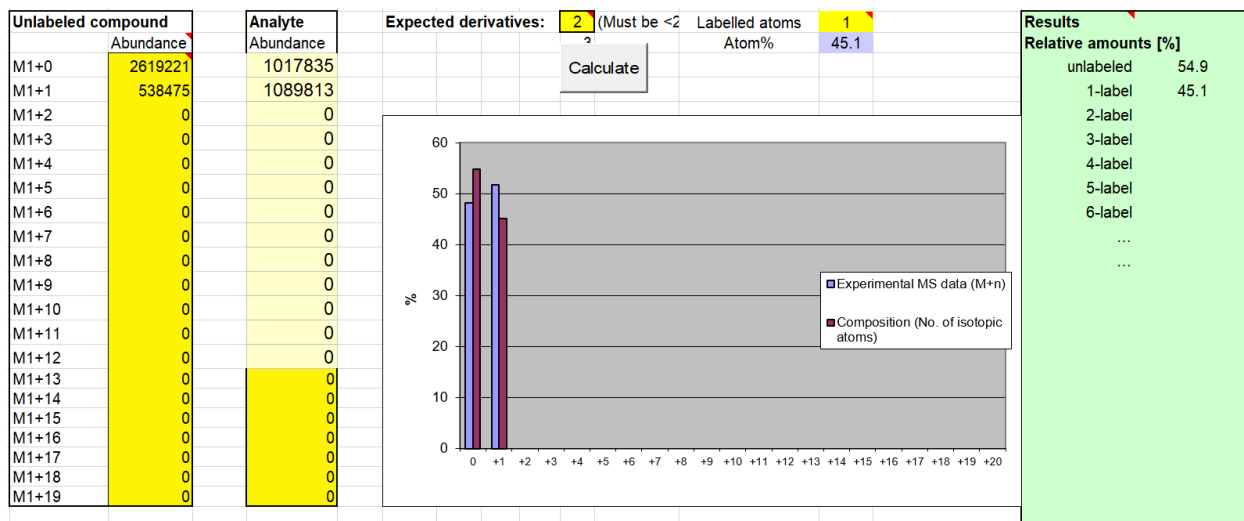

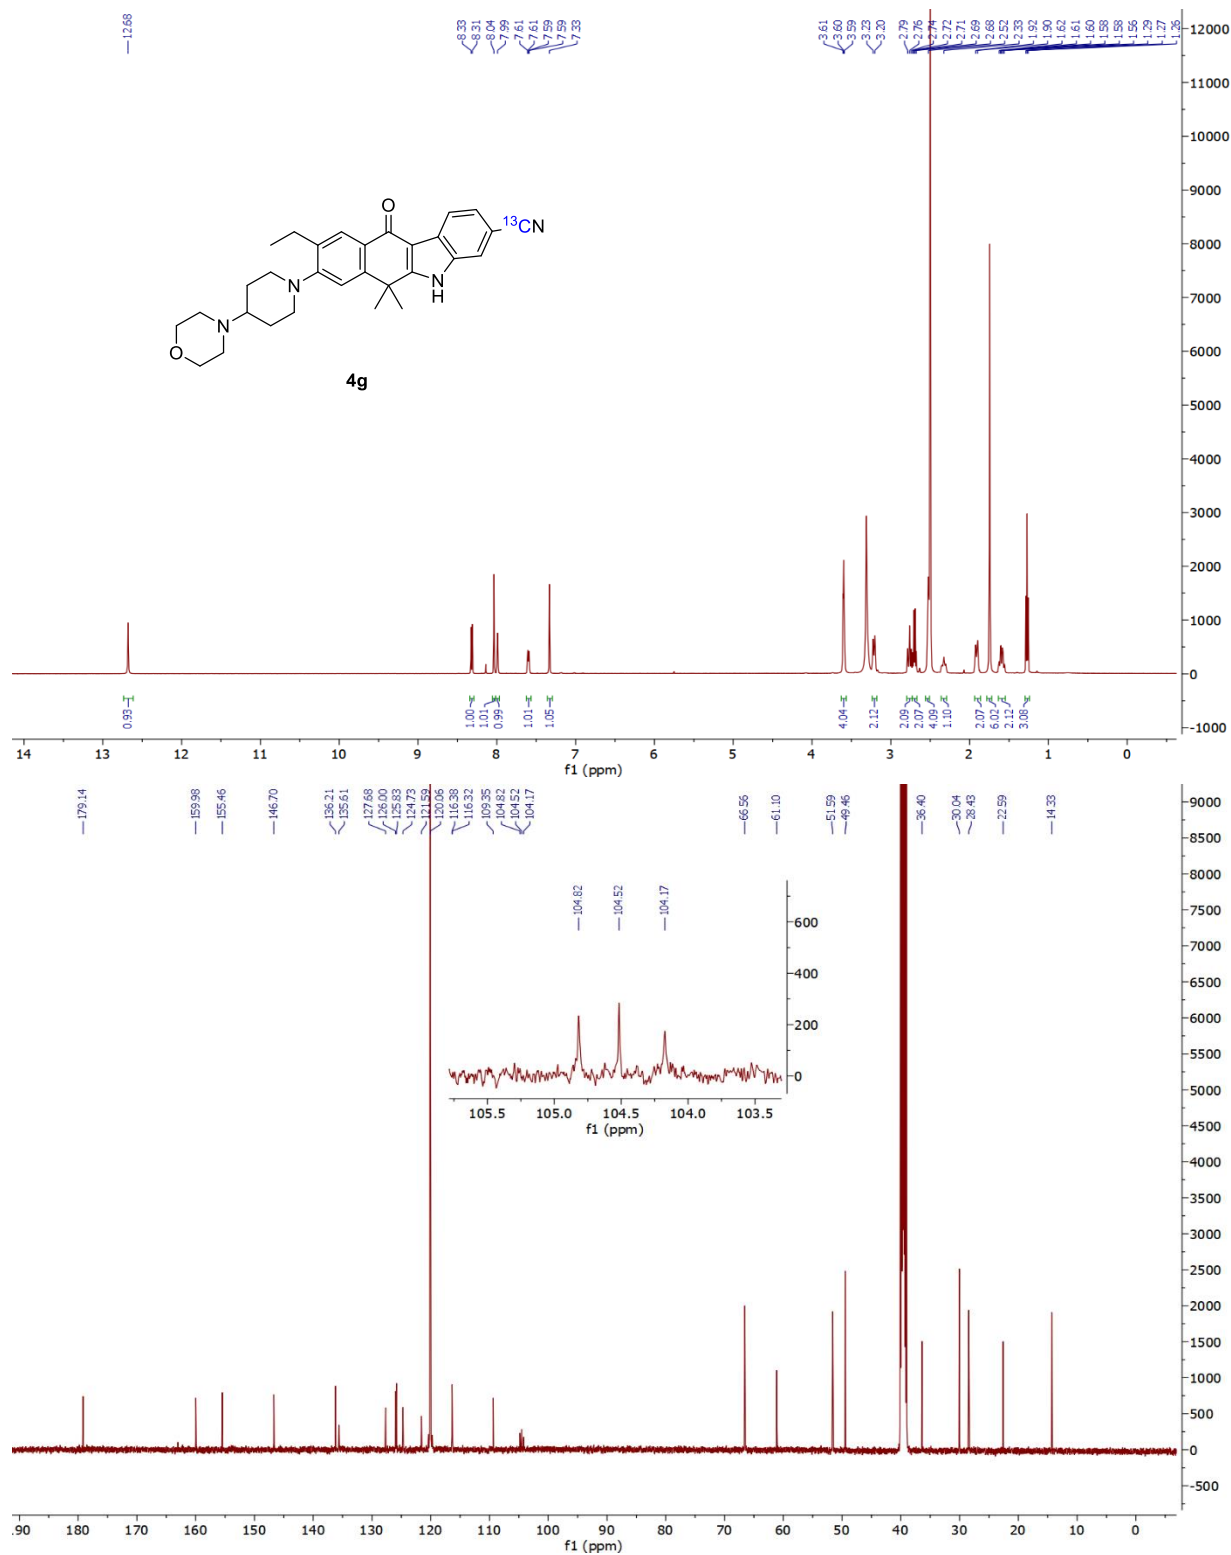

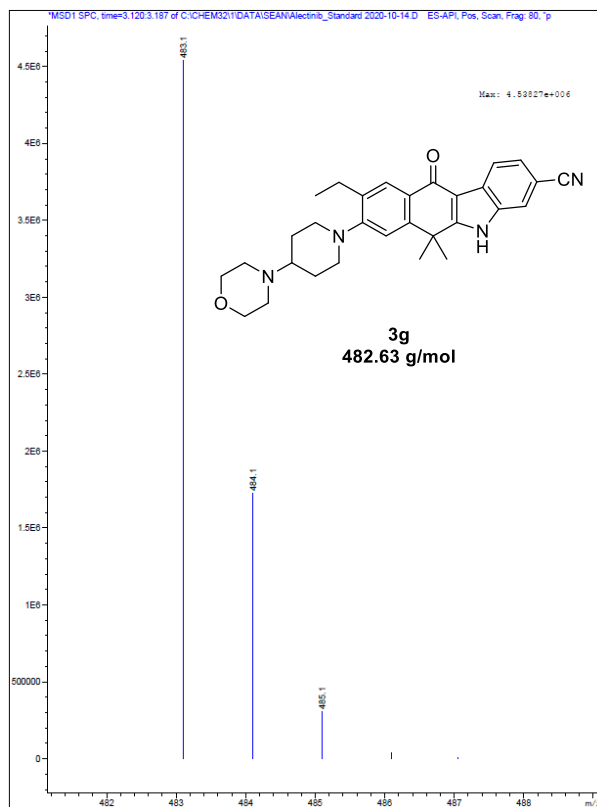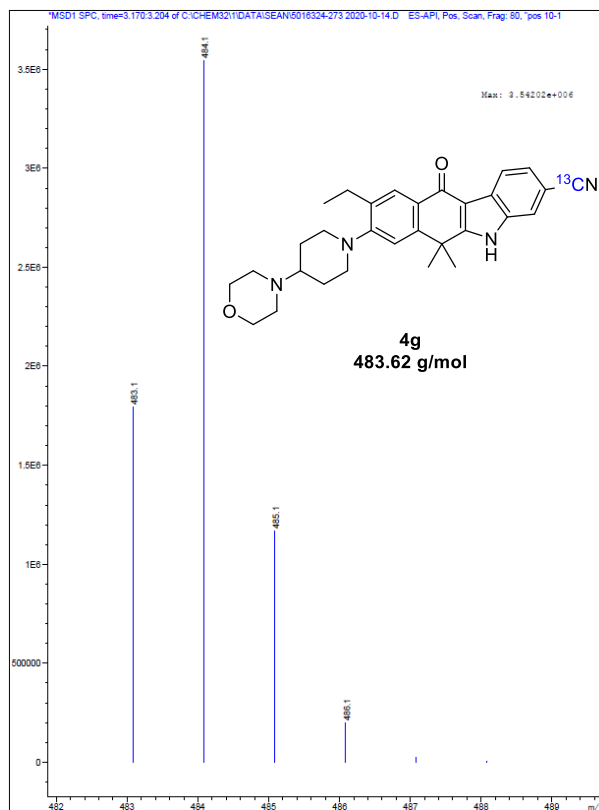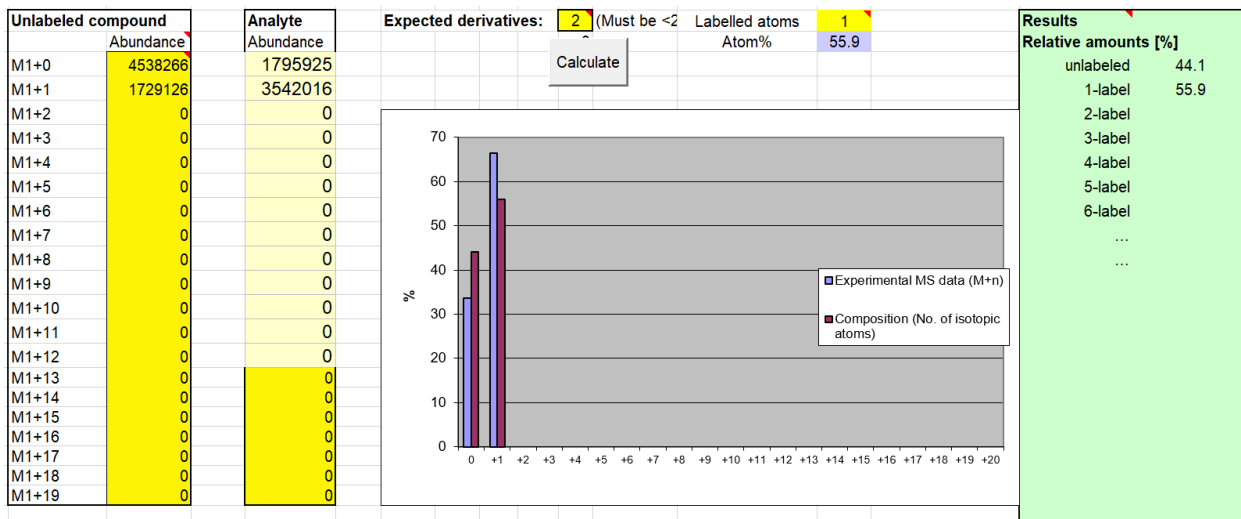

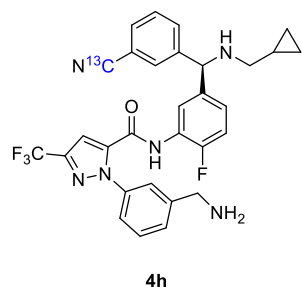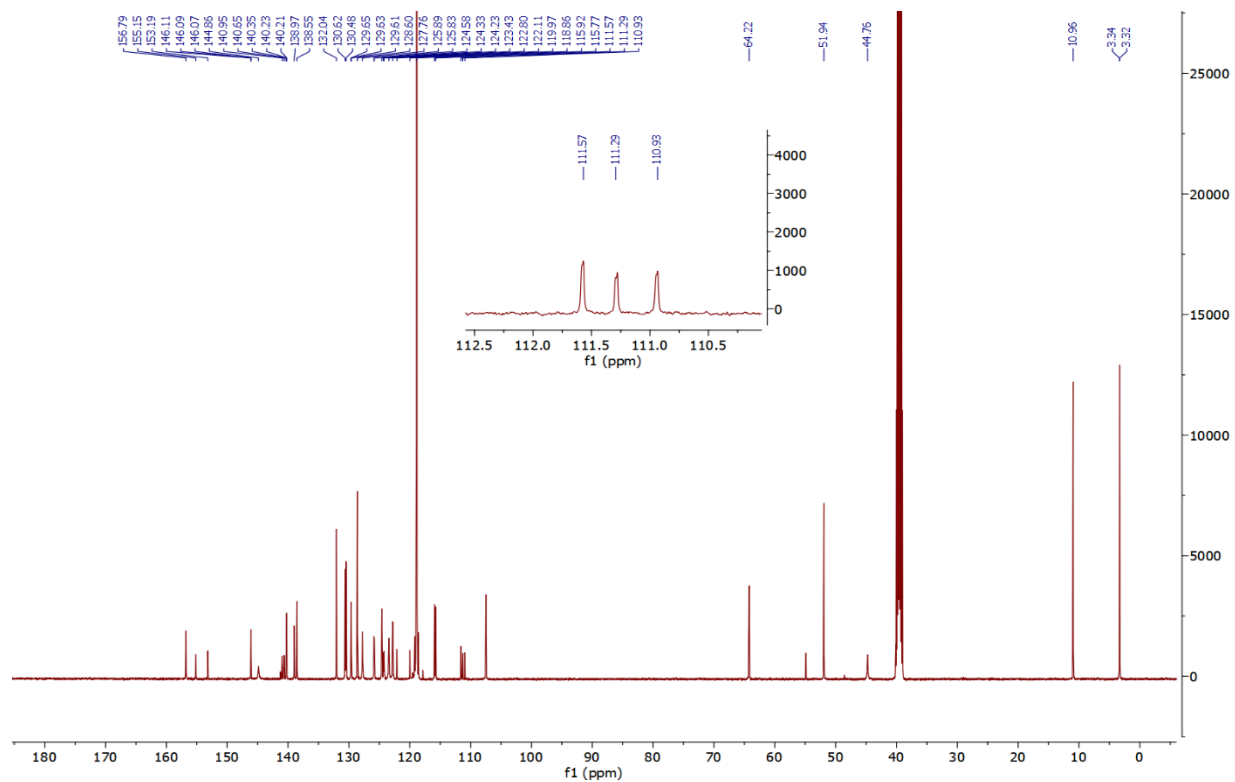

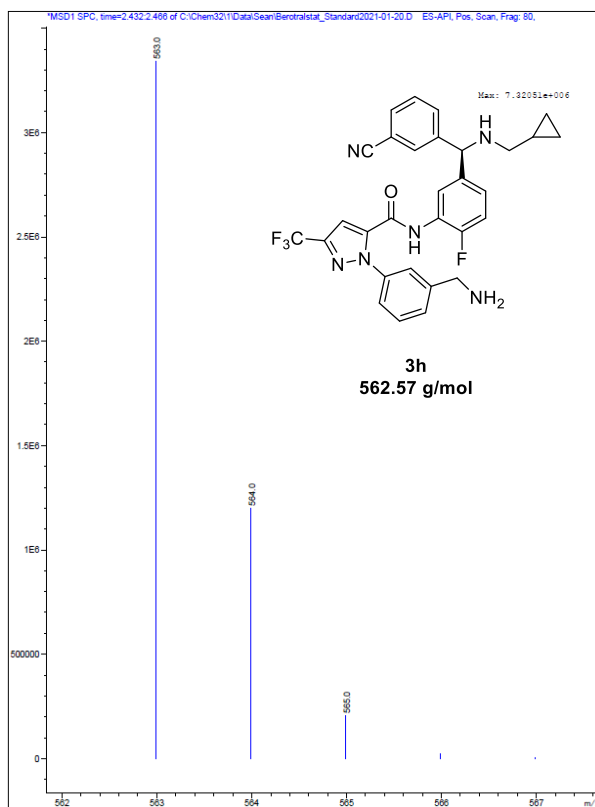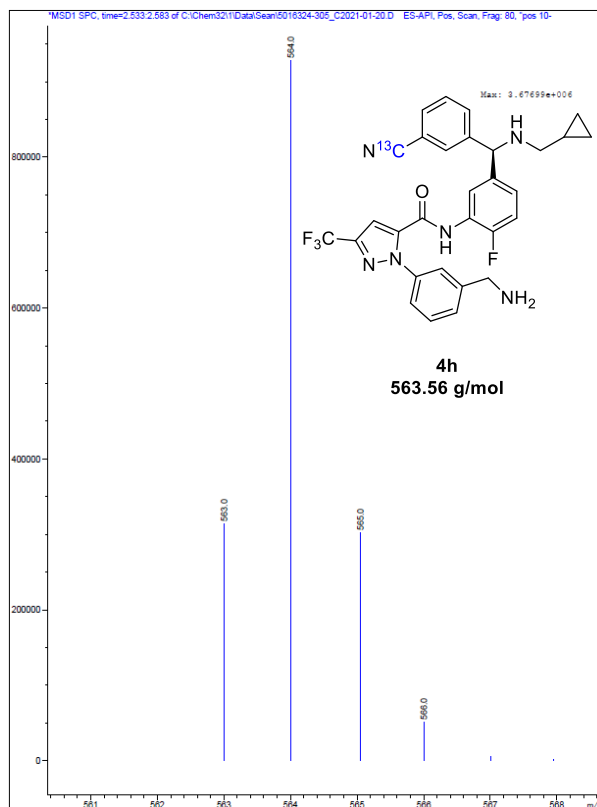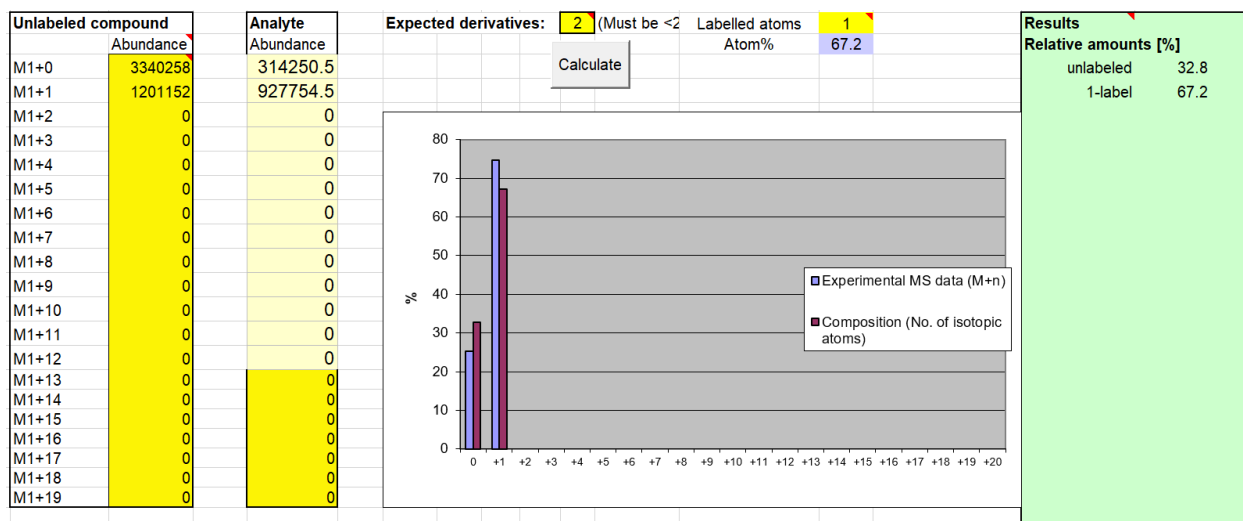

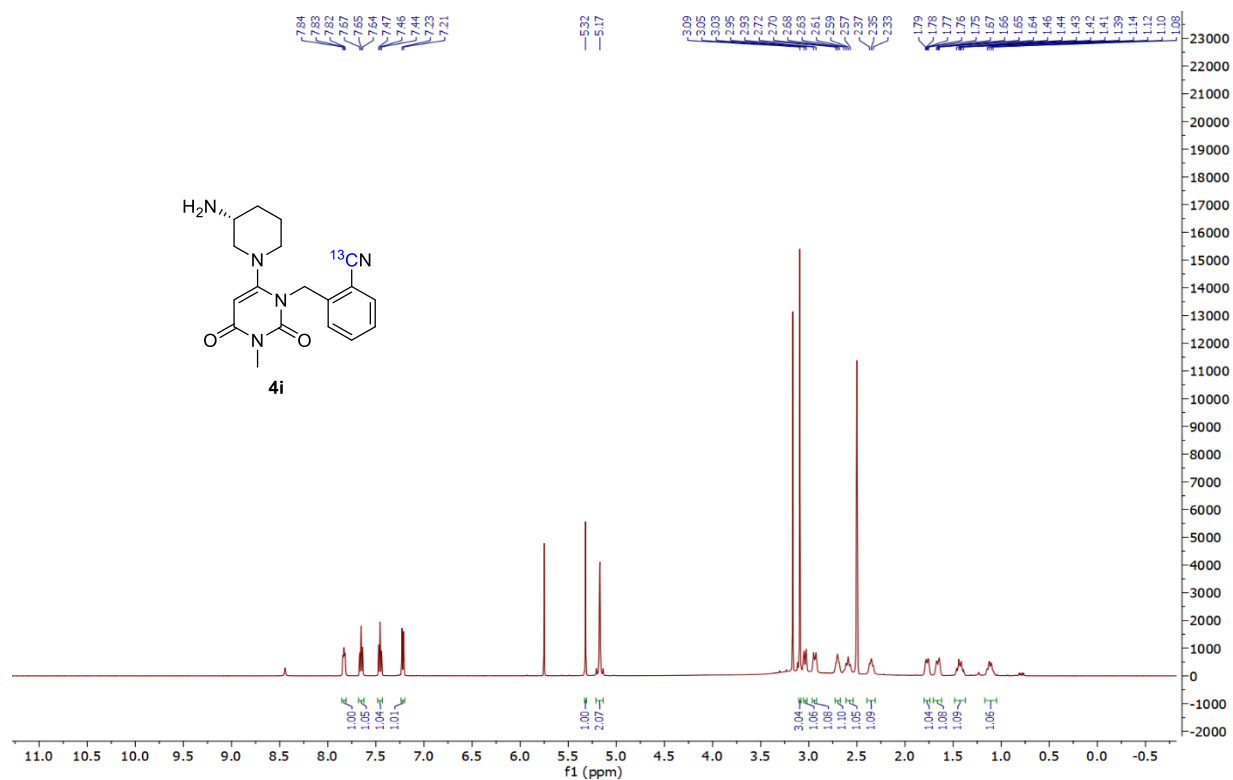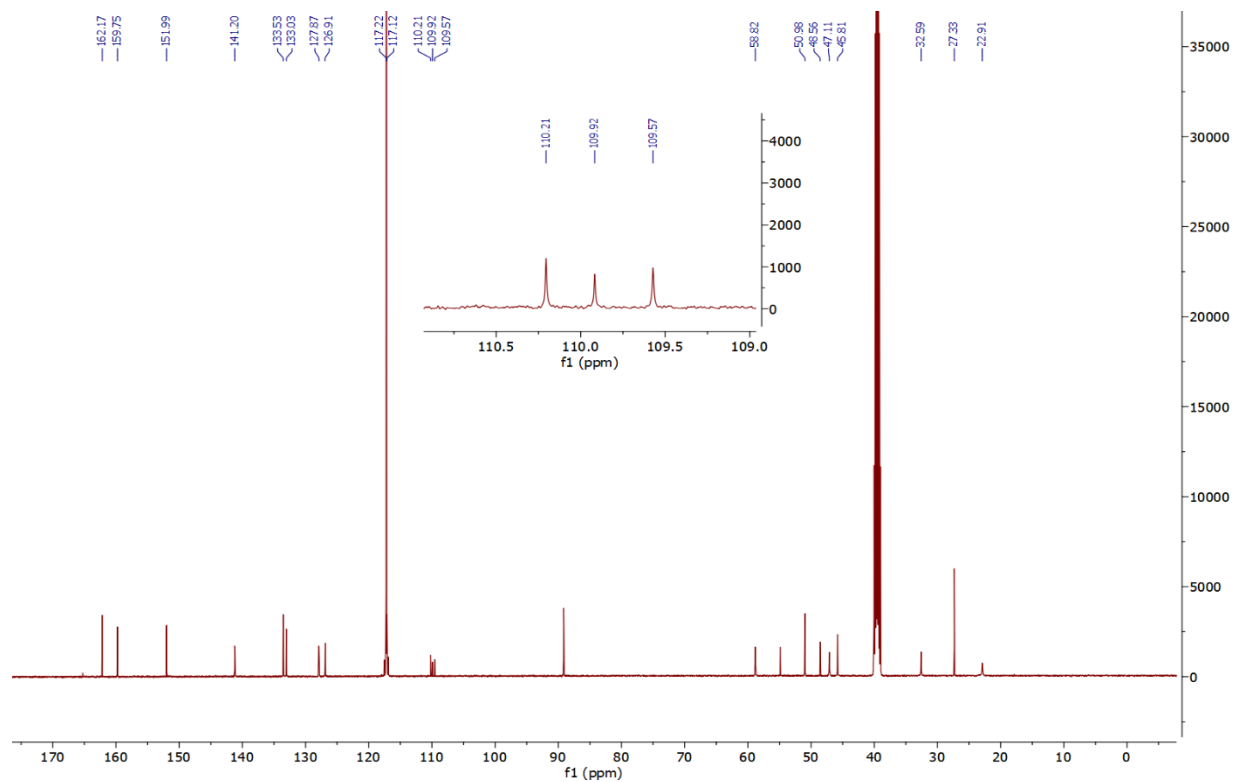



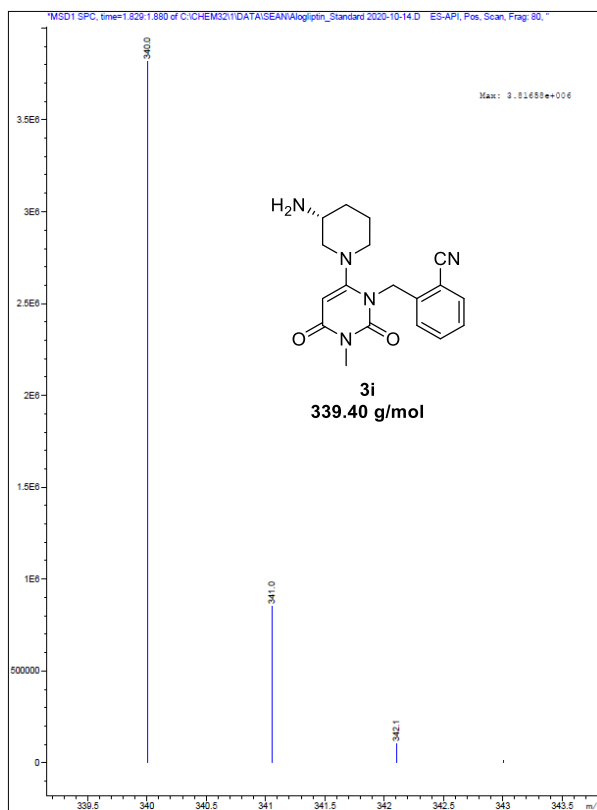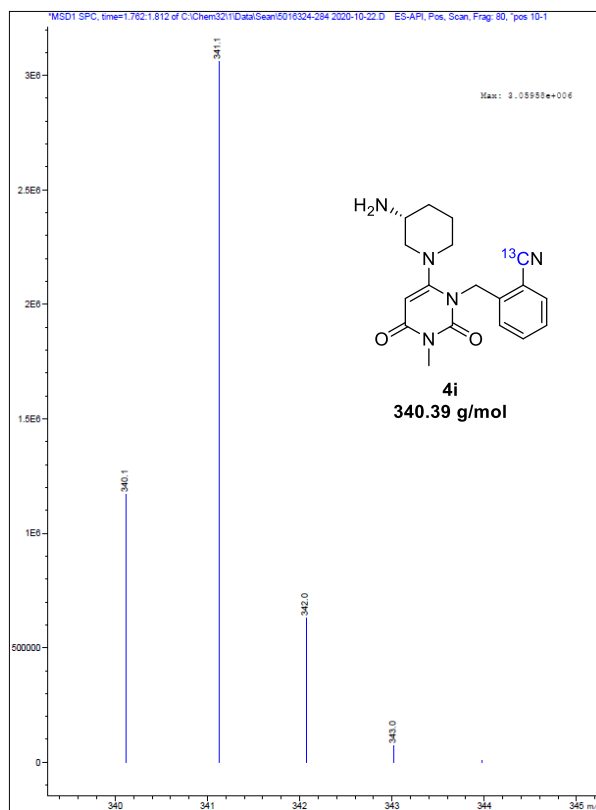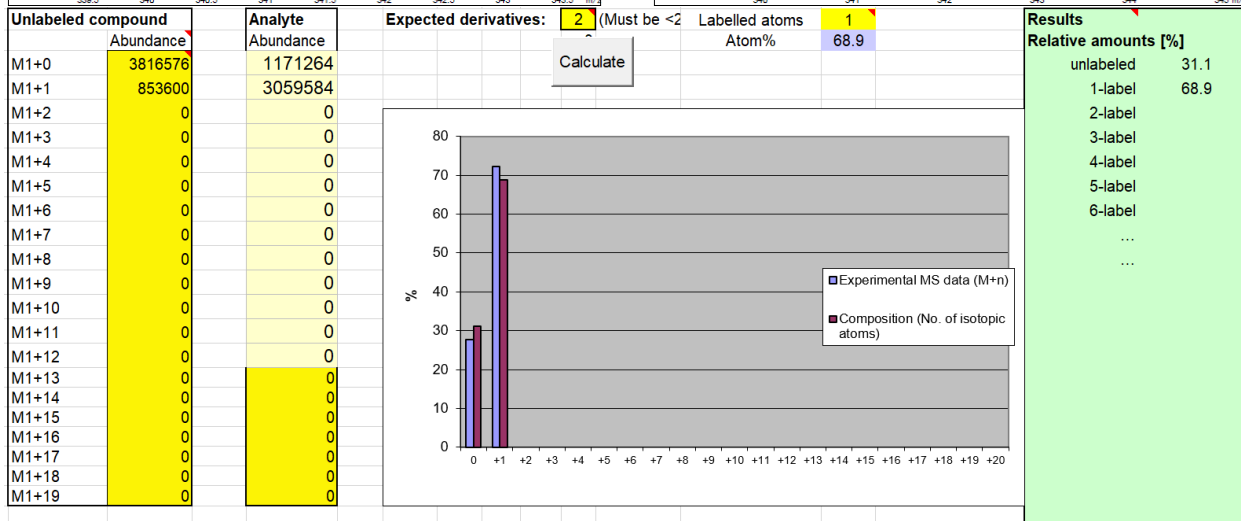

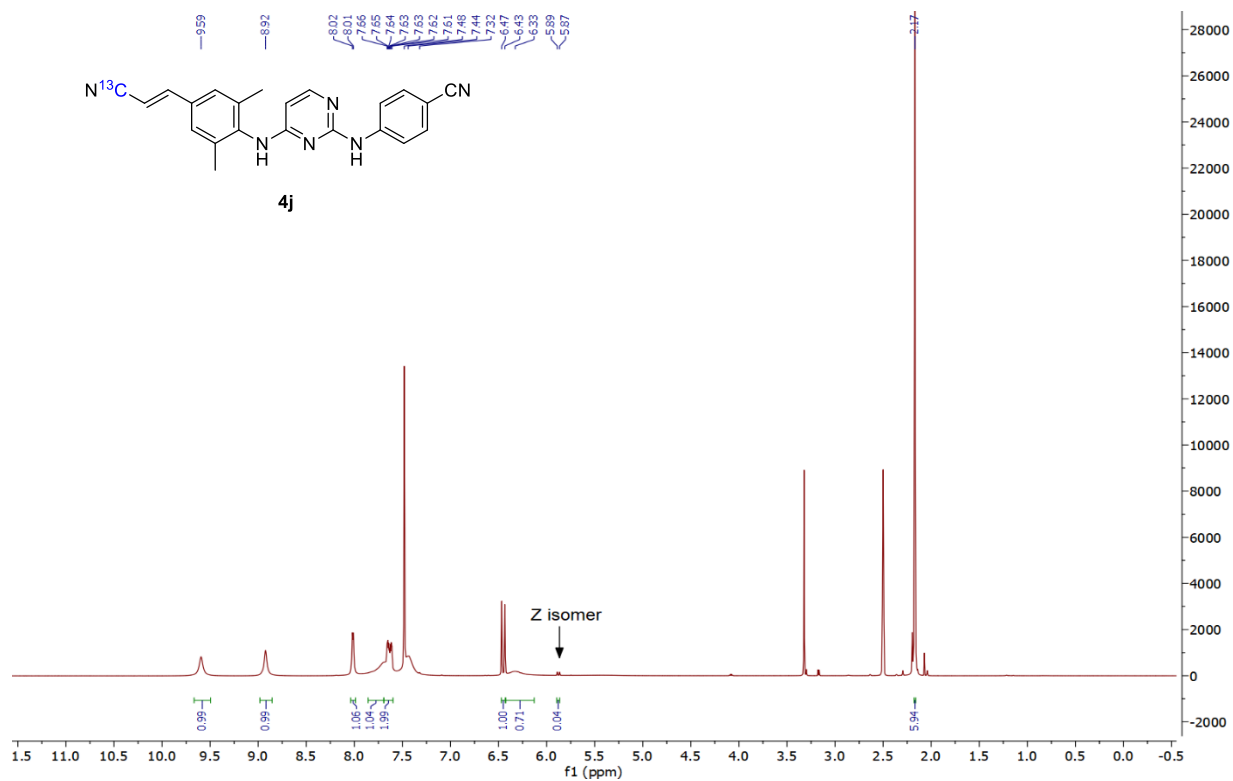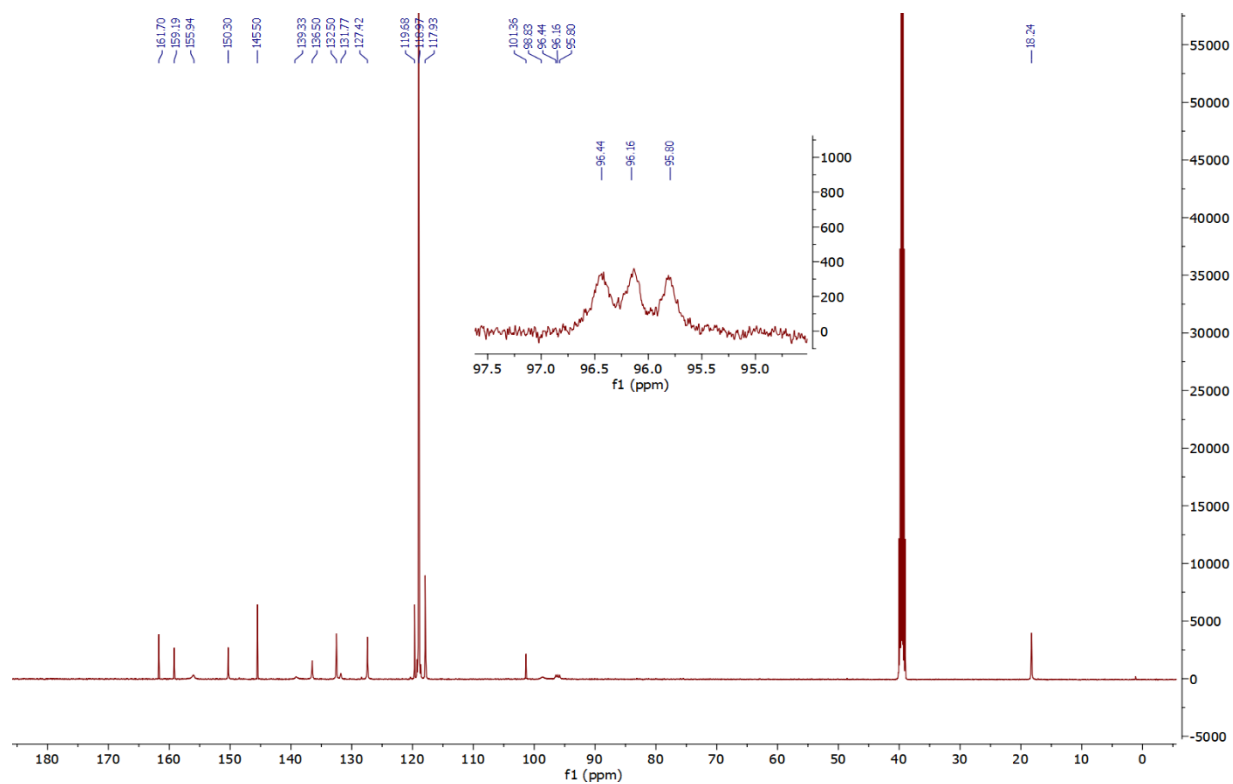

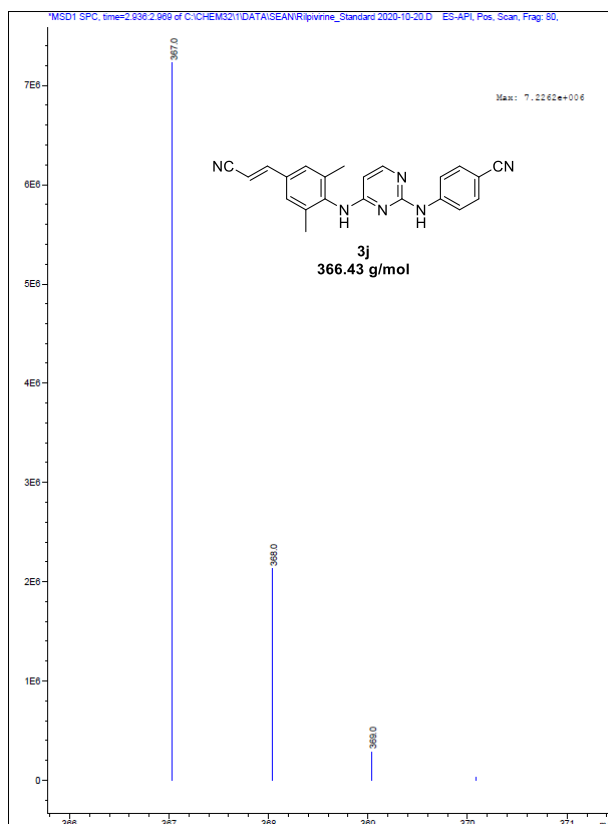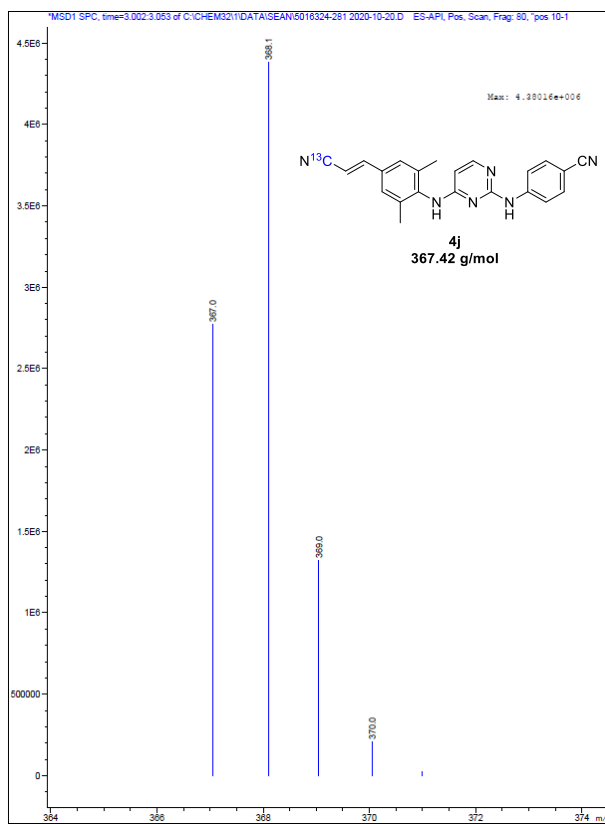

| Unlabeled compound | Abundance |
|--------------------|-----------|
| M1+0               | 7226197   |
| M1+1               | 2130091   |
| M1+2               | 0         |
| M1+3               | 0         |
| M1+4               | 0         |
| M1+5               | 0         |
| M1+6               | 0         |
| M1+7               | 0         |
| M1+8               | 0         |
| M1+9               | 0         |
| M1+10              | 0         |
| M1+11              | 0         |
| M1+12              | 0         |
| M1+13              | 0         |
| M1+14              | 0         |
| M1+15              | 0         |
| M1+16              | 0         |
| M1+17              | 0         |
| M1+18              | 0         |
| M1+19              | 0         |

| Analyte | Abundance |
|---------|-----------|
| 2770304 | 0         |
| 4380160 | 0         |
|         | 0         |
|         | 0         |
|         | 0         |
|         | 0         |
|         | 0         |
|         | 0         |
|         | 0         |
|         | 0         |
|         | 0         |
|         | 0         |
|         | 0         |
|         | 0         |
|         | 0         |
|         | 0         |
|         | 0         |
|         | 0         |
|         | 0         |
|         | 0         |
|         | 0         |

Expected derivatives: 2 (Must be <2)

Calculate

Labelled atoms Atom% 53.3

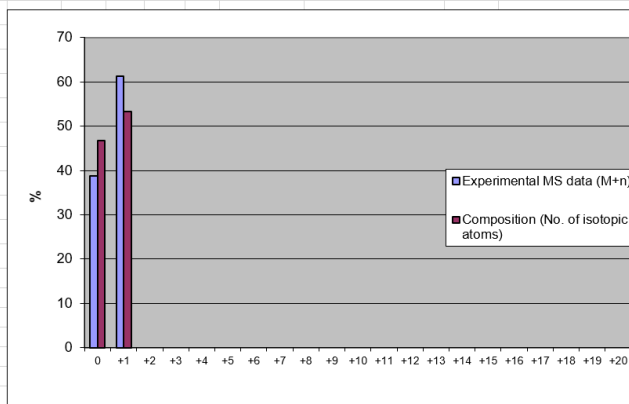

| Results              |      |
|----------------------|------|
| Relative amounts [%] |      |
| unlabeled            | 46.7 |
| 1-label              | 53.3 |
| 2-label              |      |
| 3-label              |      |
| 4-label              |      |
| 5-label              |      |
| 6-label              |      |
| ...                  |      |
| ...                  |      |

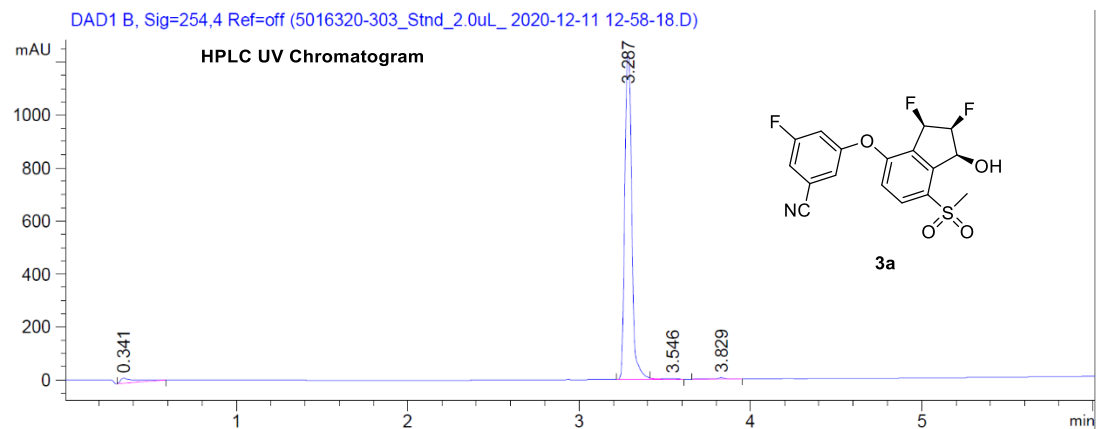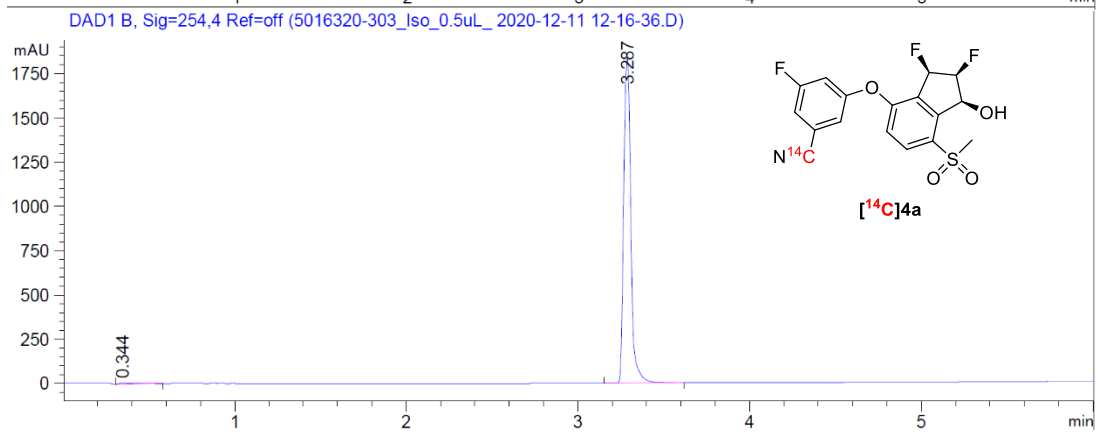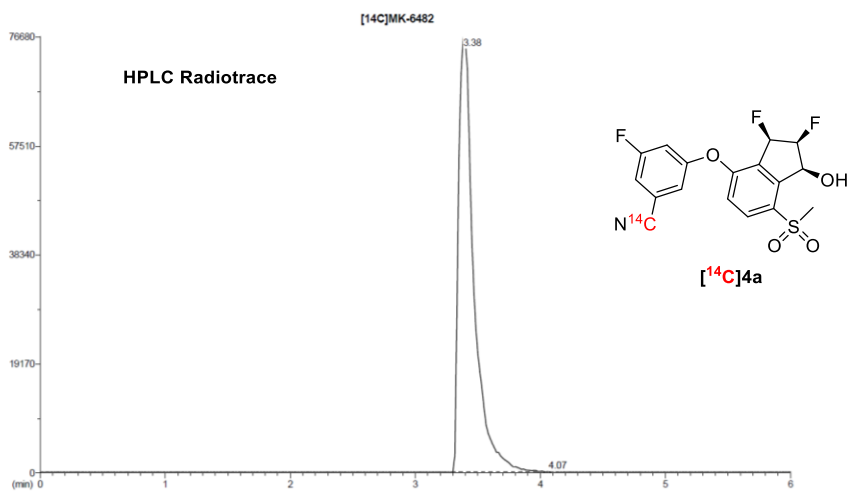

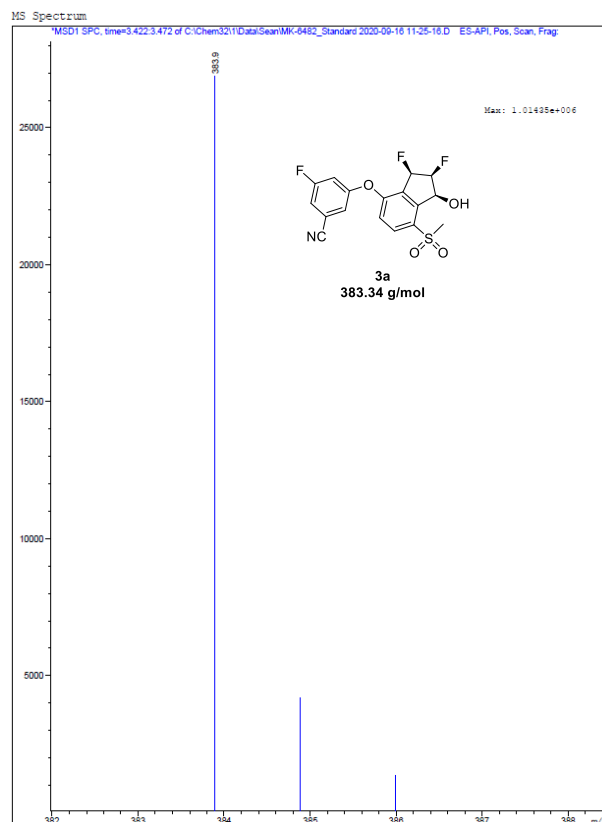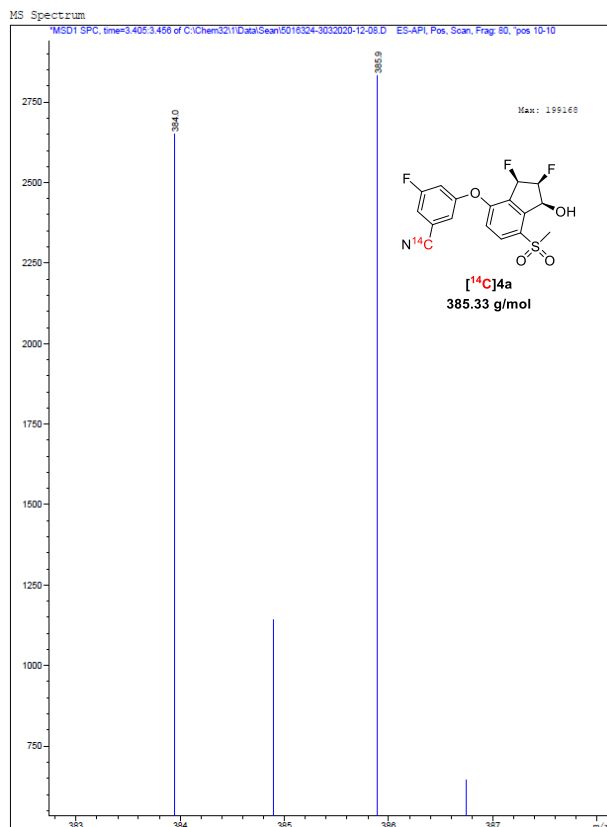

### Carbon-14 Specific Activity From Mass Spectrometry

#### SPACTCAL ver2.10

| [M-H]<br>[M+H] | Reference     | Percent<br>of Parent | Percent<br>of Total | Carbon-14<br>Labeled | Percent<br>of Parent | Percent<br>of Total |
|----------------|---------------|----------------------|---------------------|----------------------|----------------------|---------------------|
| 384            | 26.873        | 100.00%              | 82.895%             | 2.651                | 100.00%              | 36.475%             |
| 385            | 4.204         | 15.64%               | 12.968%             | 1.143                | 43.11%               | 15.724%             |
| 386            | 1.341         | 4.99%                | 4.138%              | 2.831                | 106.80%              | 38.956%             |
| 387            | 0             | 0.00%                | 0.000%              | 643                  | 24.25%               | 8.844%              |
| 388            | 0             | 0.00%                | 0.000%              | 0                    | 0.00%                | 0.000%              |
| 389            | 0             | 0.00%                | 0.000%              | 0                    | 0.00%                | 0.000%              |
| 390            | 0             | 0.00%                | 0.000%              | 0                    | 0.00%                | 0.000%              |
| 391            | 0             | 0.00%                | 0.000%              | 0                    | 0.00%                | 0.000%              |
| 392            | 0             | 0.00%                | 0.000%              | 0                    | 0.00%                | 0.000%              |
| 393            | 0             | 0.00%                | 0.000%              | 0                    | 0.00%                | 0.000%              |
| 394            | 0             | 0.00%                | 0.000%              | 0                    | 0.00%                | 0.000%              |
| 395            | 0             | 0.00%                | 0.000%              | 0                    | 0.00%                | 0.000%              |
| 396            | 0             | 0.00%                | 0.000%              | 0                    | 0.00%                | 0.000%              |
| 397            | 0             | 0.00%                | 0.000%              | 0                    | 0.00%                | 0.000%              |
| 398            | 0             | 0.00%                | 0.000%              | 0                    | 0.00%                | 0.000%              |
| 399            | 0             | 0.00%                | 0.000%              | 0                    | 0.00%                | 0.000%              |
| 400            | 0             | 0.00%                | 0.000%              | 0                    | 0.00%                | 0.000%              |
| <b>Total</b>   | <b>32.418</b> |                      |                     | <b>7.268</b>         |                      |                     |

| Molecular Weight | [M-H]<br>[M+H] | # 14C<br>Atoms | Tracer<br>Intensity | Reference<br>Ion Intensity | Net Tracer<br>Intensity | Theoretical<br>mCi/mmol | Measured<br>mCi/mmol | Mol. Wt.<br>Calculation | Tracer % of<br>Total (corr) |
|------------------|----------------|----------------|---------------------|----------------------------|-------------------------|-------------------------|----------------------|-------------------------|-----------------------------|
| 383.340          | 384            | 0              | 2,651               | 100.00%                    | 2,651                   | 0.0                     | 0.0000               | 189.95                  | 49.55%                      |
| 385.329          | 386            | 1              | 2,831               | 4.99%                      | 2,699                   | 62.4                    | 31.4798              | 194.39                  | 50.45%                      |
| 387.318          | 388            | 2              | 0                   | 0.00%                      | 0                       | 124.8                   | 0.0000               | 0.00                    | 0.00%                       |
| 389.307          | 390            | 3              | 0                   | 0.00%                      | 0                       | 187.2                   | 0.0000               | 0.00                    | 0.00%                       |
| 391.296          | 392            | 4              | 0                   | 0.00%                      | 0                       | 249.6                   | 0.0000               | 0.00                    | 0.00%                       |
| 393.285          | 394            | 5              | 0                   | 0.00%                      | 0                       | 312.0                   | 0.0000               | 0.00                    | 0.00%                       |
| 395.274          | 396            | 6              | 0                   | 0.00%                      | 0                       | 374.4                   | 0.0000               | 0.00                    | 0.00%                       |
| 397.263          | 398            | 7              | 0                   | 0.00%                      | 0                       | 436.8                   | 0.0000               | 0.00                    | 0.00%                       |
| 399.252          | 400            | 8              | 0                   | 0.00%                      | 0                       | 499.2                   | 0.0000               | 0.00                    | 0.00%                       |
| <b>Total</b>     | <b>Total</b>   |                | <b>5,482</b>        |                            | <b>5,350</b>            |                         | <b>31.4798</b>       | <b>384.343</b>          |                             |
|                  |                |                |                     |                            |                         |                         |                      | <b>mCi/mmol</b>         | <b>31.480</b>               |
|                  |                |                |                     |                            |                         |                         |                      | <b>Mol. Wt.</b>         | <b>384.343</b>              |
|                  |                |                |                     |                            |                         |                         |                      | <b>uCi/mg:</b>          | <b>81.9054</b>              |
|                  |                |                |                     |                            |                         |                         |                      | <b>mCi/mL:</b>          | <b>0.71</b>                 |
|                  |                |                |                     |                            |                         |                         |                      | <b>mg/mL:</b>           | <b>8.668535875</b>          |

## References

1. Isotope distribution was calculated based on mass spectrometry data using IsoPat2. Excel-Worksheet for deconvolution of MS-patterns (D,<sup>17</sup>O,<sup>13</sup>C,<sup>15</sup>N) © Christian C. Gruber, Wolfgang Kroutil 2006. Changes and additions to the original and excellent IsoPat2 have been made by W J S Lockley (Mod21) to facilitate its use by isotopic chemists. For details of the original spreadsheet see: Gruber, C.; Oberdorfer, G.; Voss, C.; Kremsner, J.; Kappe, C.; Kroutil, W. An Algorithm for the Deconvolution of Mass Spectroscopic Patterns in Isotope Labeling Studies. Evaluation for the Hydrogen–Deuterium Exchange Reaction in Ketones. *J. Org. Chem.* **2007**, *72*, 5778.
2. Frisch, M. J.; Trucks, G. W.; Schlegel, H. B.; Scuseria, G. E.; Robb, M. A., et al. *Gaussian 16*, Wallingford, CT, 2016.
3. Becke, A. D., Density-Functional Thermochemistry. III. The Role of Exact Exchange. *J. Chem. Phys.* **1993**, *98*, 5648-5652.
4. Lee, C.; Yang, W.; Parr, R. G., Development of the Colle-Salvetti Correlation-Energy Formula into a Functional of the Electron Density. *Phys. Rev. B* **1988**, *37*, 785-789.
5. Vosko, S. H.; Wilk, L.; Nusair, M., Accurate Spin-Dependent Electron Liquid Correlation Energies for Local Spin Density Calculations: A Critical Analysis. *Can. J. Phys.* **1980**, *58*, 1200-1211.
6. Stephens, P. J.; Devlin, F. J.; Chabalowski, C. F.; Frisch, M. J., Ab Initio Calculation of Vibrational Absorption and Circular Dichroism Spectra Using Density Functional Force Fields. *J. Phys. Chem.* **1994**, *98*, 11623-11627.
7. Grimme, S.; Antony, J.; Ehrlich, S.; Krieg, H., A Consistent and Accurate *Ab Initio* Parametrization of Density Functional Dispersion Correction (DFT-D) for the 94 Elements H-Pu. *J. Chem. Phys.* **2010**, *132*, 154104.
8. Hay, P. J.; Wadt, W. R., Ab Initio Effective Core Potentials for Molecular Calculations. Potentials for the Transition Metal Atoms Sc to Hg. *J. Chem. Phys.* **1985**, *82*, 270-283.
9. Ribeiro, R. F.; Marenich, A. V.; Cramer, C. J.; Truhlar, D. G., Use of Solution-Phase Vibrational Frequencies in Continuum Models for the Free Energy of Solvation. *J. Phys. Chem. B* **2011**, *115*, 14556-14562.
10. Zhao, Y.; Truhlar, D. G., The M06 Suite of Density Functionals for Main Group Thermochemistry, Thermochemical Kinetics, Noncovalent Interactions, Excited States, and Transition Elements: Two New Functionals and Systematic Testing of Four M06-Class Functionals and 12 Other Functionals. *Theor. Chem. Acc.* **2008**, *120*, 215-241.
11. Rappoport, D.; Furche, F., Property-Optimized Gaussian Basis Sets for Molecular Response Calculations. *J. Chem. Phys.* **2010**, *133*, 134105.
12. Pritchard, B. P.; Altarawy, D.; Didier, B.; Gibson, T. D.; Windus, T. L., New Basis Set Exchange: An Open, Up-to-Date Resource for the Molecular Sciences Community. *J. Chem. Inf. Model.* **2019**, *59*, 4814-4820.
13. Tomasi, J.; Mennucci, B.; Cammi, R., Quantum Mechanical Continuum Solvation Models. *Chem. Rev.* **2005**, *105*, 2999-3094.
